# Supplementary material
Source: PubMed Central journal article supplement (PMC7779467)
Supplement: NIHMS1655128-supplement-Supplementary_Material.pdf [file NIHMS1655128-supplement-Supplementary_Material.pdf]

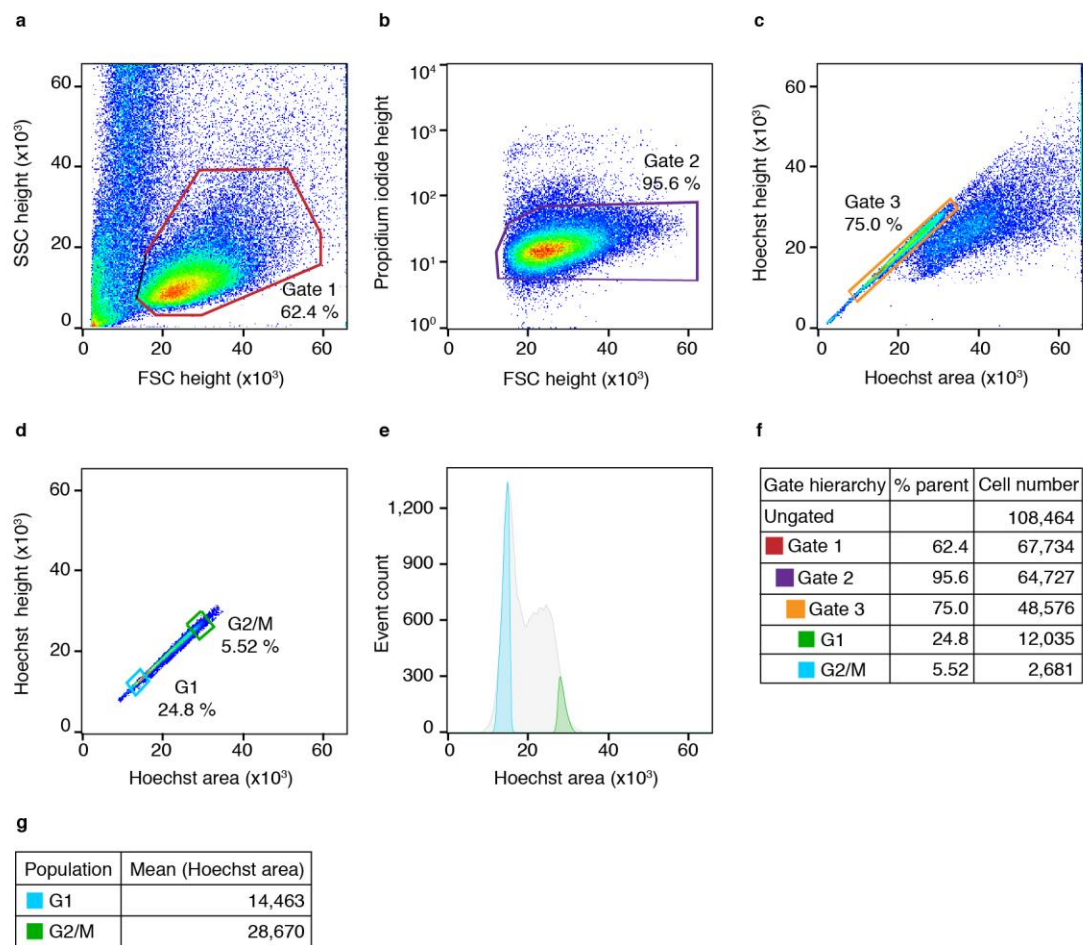

## Supplementary Figure 1

### Gating strategy for FACS

a. Dot plot of ungated mESCs showing gating strategy to exclude debris in FSC (Forward Scatter) versus SSC (Side Scatter). Percentage of events in Gate 1 is indicated.

b. Dot plot of mESCs passing Gate 1 showing gating strategy to exclude dead cells in Propidium iodide versus FSC. Percentage of events in Gate 2 is indicated.

c. Dot plot of mESCs passing Gate 2 showing gating strategy to exclude duplet cells in Hoechst versus Hoechst area. Percentage of events in Gate 3 is indicated.

d. Dot plot of mESCs passing Gate 3 were gated for DNA content in G1 and G2/M phase of the cell cycle. The gate for the G2/M population was defined by doubling the intensity value of the G1 peak maximum.

e. DNA content histogram events in Gate 3 showing counted events versus Hoechst area. Only cells passing gate G2/M were sorted.

f. Table indicating gate hierarchy, percentage of events in each gate relative to parent population and total numbers of events within each gate.

g. Table indicating the mean value for the G1 and G2/M populations.

All measurements were done on the BD FACSJazz and analyzed with the FlowJo software, version 10.1r5.

## Supplementary Methods

### scDamID2

#### Lysis plate preparation – **Timing 45 min for one plate**

**CRITICAL** It is crucial that the working area is sufficiently clean when working with single cell material. DNAzap and RNaseZAP treatment is required in steps 1-5 and 8-25. RNaseZAP treatment is sufficient for steps 26-33. Ethanol 80 % (vol/vol) treatment is sufficient for steps 34-35.

**CRITICAL** We recommend preparing lysis plates, adapter plates and master mixes before single-cell material amplification by IVT in a PCR workstation.

1. Pipet 5  $\mu$ l of mineral oil in each well of a 384-well plate and seal the plate with an aluminium seal.
2. Prepare the lysis mix according to the table below. Keep the mix on ice at all times.

| Reagent                 | Amount for 1 well (nl) | Amount for 1 plate ( $\mu$ l) | Final concentration in mix |
|-------------------------|------------------------|-------------------------------|----------------------------|
| Lysis buffer 1.03 x     | 290                    | 162.5                         | 1 x                        |
| Proteinase K (20 mg/ml) | 10                     | 5.6                           | 0.67 mg/ml                 |
| Total volume            | 300                    |                               |                            |

3. In an 8-well PCR strip, aliquot 20.7  $\mu$ l of mix per well of the strip. Spin for 3-5 sec on tabletop spinner. Keep on ice at all times.
4. Dispense 300 nl per well with the Nanodrop II robot (Box 2). The cumulative reaction volume is 300 nl.
5. Seal the plate and centrifuge at 2,000 g for 1 min at 4 °C.

**PAUSE POINT** The lysis plates can be kept at 4 °C until sort on the same day or maximum overnight.

#### Dam-POI induction – **Timing 45 min performed in a cell culture hood**

6. Induce cells as stated in **scDam&T Procedure** steps 4-6.

#### Prepare cells for FACS sorting by Hoechst staining – **Timing 1 hr 30 min**

7. Prepare cells for FACS sorting as stated in **scDam&T Procedure** steps 7-31.

**PAUSE POINT** Proceed with lysis after FACS sorting or store the sorted plates at -20 °C for several months.

**Lysis – Timing 8 hr 20 min**

8. Thaw the plates on ice if stored at -20 °C.

9. Put the plate in a thermocycler at 50 °C for 8 hr, then 80 °C for 20 min with the thermocycler lid at 100 °C and let the machine go to 4 °C at the end of the program.

**PAUSE POINT** The lysed plates can be kept at -20 °C for several months.

**DpnI digestion – Timing 8 hr 35 min**

10. Thaw the plates on ice if stored at -20 °C.

11. Thaw the 10x CutSmart buffer at room temperature and keep on ice. Keep the DpnI enzyme on an ice block at all times.

12. Prepare the DpnI mix according to the table below. Keep the mix on ice at all times.

| Reagent             | Amount for 1 well (nl) | Amount for 1 plate (µl) | Final concentration in mix |
|---------------------|------------------------|-------------------------|----------------------------|
| Nuclease-free water | 590                    | 272.8                   |                            |
| 10x CutSmart buffer | 100                    | 46.2                    | 1.6 x                      |
| DpnI (20 U/µl)      | 10                     | 4.6                     | 0.33 U/µl                  |
| Total volume        | 700                    |                         |                            |

13. In an 8-well PCR strip, aliquot 39.9 µl of mix per well of the strip. Spin for 3-5 sec on tabletop spinner. Keep on ice at all times.

14. Dispense 700 nl per well with the Nanodrop II robot (Box 2). The cumulative reaction volume is 1000 nl.

15. Seal the plate and centrifuge at 2,000 g for 1 min at 4 °C

16. Put the plate in a thermocycler at 37 °C for 8 hr, then at 80 °C for 20 min with the lid at 100 °C and then place on ice for 1-2 min to cool down.

17. Centrifuge at 2,000 g for 1 min at 4 °C

**Adapter dispensation – Timing 45 min for 1 plate**

18. Dispense adapters as stated in **scDam&T Procedure** steps 67-71 but dispense 400 nl of adapter instead of 50 nl. The cumulative reaction volume is 1400 nl.

**Adapter ligation – Timing 12 h 45 min overnight reaction**

19. Thaw the 10x Ligase buffer on ice. Keep the T4 ligase on an ice block at all times.  
20. Prepare the ligation mix according to the table below. Keep the mix on ice at all times.

| Reagent             | Amount for 1 well (nl) | Amount for 1 plate (µl) | Final concentration in mix |
|---------------------|------------------------|-------------------------|----------------------------|
| Nuclease-free water | 375                    | 178.0                   |                            |
| 10x Ligase buffer   | 200                    | 94.9                    | 3.33 x                     |
| T4 Ligase (5 U/µl)  | 25                     | 11.8                    | 0.20 U/µl                  |
| Total volume        | 600                    |                         |                            |

21. In an 8-well PCR strip, aliquot 35.1 µl of mix per well of the strip. Spin for 3-5 sec on tabletop spinner. Keep on ice at all times.  
22. Dispense 600 nl per well with the Nanodrop II robot (Box 2). The cumulative reaction volume is 2000 nl.  
23. Seal the plate and centrifuge at 2,000 g for 1 min at 4 °C  
24. Put the plate in a thermocycler at 16 °C for 12 hr, then 65 °C for 10 min with the lid at 100 °C. Let the thermocycler go to 4 °C at the end of the program.  
25. Centrifuge at 2,000 g for 1 min at 4 °C

**PAUSE POINT** The processed plate can be kept at -20 °C up to a month.

**Pool cells – Timing 1 hr for one plate**

26. Pool cells as stated in **Procedure** steps 79-82.

**Purification of barcoded material – Timing 1 hr**

27. Purify the barcoded material as stated in **scDam&T Procedure** steps 83-91 but use a lower dilution of AMPure XP beads (Reagent setup) and 1.0 volume diluted AMPure XP beads to purify material instead of 0.8 volume.

**Amplification by *in vitro* transcription – Timing 14 hr 15 min**

28. Amplify the barcoded material as stated in **scDam&T Procedure** steps 92-96.

**Purification of aRNA – Timing 1 hr**

29. Purify the aRNA as stated in **scDam&T Procedure** steps 97-108.

**aRNA fragmentation – Timing 5 min**

30. Fragment the aRNA as stated in **scDam&T Procedure** steps 109-113.

**Purification and quantification of fragmented aRNA – Timing 1 hr 45 min**

31. Purify the aRNA as stated in **scDam&T Procedure** steps 114-125.

**Reverse transcription – Timing 1 hr 30 min**

32. Reverse transcribe the aRNA for library preparation as stated in **scDam&T Procedure** steps 126-127.

**PCR indexing – Timing 30 min**

33. Index PCR the reverse transcribed material as stated in **scDam&T Procedure** step 128.

**Library purification – Timing 1 hr 30 min**

34. Purify the libraries as stated in **scDam&T Procedure** steps 129-141.

**Library quantification and sequencing – Timing 19 hr**

35. Prepare the libraries for sequencing submission as stated in **scDam&T Procedure** steps 142-145.

**PAUSE POINT** The finished libraries can be kept at -20 °C indefinitely.

## DamID2 in bulk

### Dam-POI induction – **Timing** 45 min performed in a cell culture hood

1. Induce cells as stated in **scDam&T Procedure** steps 4-6.

### Genomic DNA isolation – **Timing** 3 hr

2. Harvest cells  $\chi$  hr after induction and extract gDNA following a standard gDNA extraction protocol. We use the Wizard Genomic DNA Purification Kit by Promega.

### DpnI digestion – **Timing** 12 hr 30 min

3. Prepare the following mix.

| Reagent               | Amount per reaction ( $\mu$ l) | Final concentration in reaction |
|-----------------------|--------------------------------|---------------------------------|
| gDNA (50 ng/ $\mu$ l) | 5                              | 25 ng/ $\mu$ l                  |
| 10x CutSmart buffer   | 1                              | 1 x                             |
| DpnI (20 U/ $\mu$ l)  | 0.25                           | 0.5 (U/ $\mu$ l)                |
| Nuclease-free water   | 3.75                           |                                 |
| Total volume          | 10                             |                                 |

4. Digest the gDNA at 37 °C for 12 hr, then 80 °C for 20 min with the lid at 100 °C. Let the thermocycler go to 4 °C at the end of the program.

### Adapter ligation – **Timing** 16 hr 30 min overnight reaction

5. Prepare the following mix.

**CRITICAL** In case of more than one sample, use a uniquely barcoded DamID adapter per sample.

| Reagent                    | Amount per reaction ( $\mu$ l) | Final concentration |
|----------------------------|--------------------------------|---------------------|
| Digested gDNA (step 4)     | 10                             |                     |
| DamID adapter (50 $\mu$ M) | 0.5                            | 2 $\mu$ M           |
| 10x Ligase buffer          | 1.25                           | 1 x                 |
| Ligase (5 U/ $\mu$ l)      | 0.25                           | 0.1 U/ $\mu$ l      |
| Nuclease-free water        | 0.5                            |                     |

|              |      |  |
|--------------|------|--|
| Total volume | 12.5 |  |
|--------------|------|--|

- Ligate the adapters by incubating reaction at 16 °C for 16 hr, then 65 °C for 10 min with the lid at 100 °C. Let the thermocycler go to 4 °C at the end of the program.

**Pool samples – Timing 10 min**

**CRITICAL** The pooling weight of each sample depends on the yield estimated from a methyl-PCR, and can vary between 0.5 and 10 µl per sample.

**CRITICAL** Work on a clean bench free from RNAses. RNaseZAP treatment is sufficient for steps 7-25. Ethanol 80 % (vol/vol) treatment is sufficient for steps 26-28.

- Pool samples to a maximum total of 2 µg with non-overlapping barcodes in a clean tube.

**Purification of barcoded material – Timing 1 hr**

- Purify the barcoded material as stated in **scDam&T Procedure** steps 83-91 but use undiluted instead of diluted AMPure XP beads, 1.0 volume AMPure XP beads to purify material instead of 0.8 volume and elute in 50 µl nuclease-free water instead of 7 µl.
- Repeat step 8, but use 0.8 volume AMPure XP beads to purify material instead of 1.0 volume and elute in 25 µl nuclease-free water instead of 50 µl.

**Amplification by *in vitro* transcription – Timing 2 hr 15 min**

- Thaw the Megascript T7 10x buffer at room temperature. Vortex thoroughly to dissolve precipitates and keep at room temperature.
- Thaw the Megascript T7 NTPs on ice and keep on ice. Keep the enzyme mix on an ice block at all times.
- Prepare the Megascript T7 mix as indicated in the table below

| Reagent                   | Amount (µl) | Final concentration in reaction |
|---------------------------|-------------|---------------------------------|
| Cleaned material (step 9) | 4           |                                 |
| Nuclease-free water       | 4           |                                 |
| 10x T7 buffer             | 2           | 1 x                             |
| ATP (75 mM)               | 2           | 7.5 mM                          |
| UTP (75 mM)               | 2           | 7.5 mM                          |
| GTP (75 mM)               | 2           | 7.5 mM                          |

|               |    |        |
|---------------|----|--------|
| CTP (75 mM)   | 2  | 7.5 mM |
| T7 enzyme mix | 2  |        |
| Total volume  | 20 |        |

13. Incubate the mix in a thermocycler at 37 °C for 2 hr with the lid heated to 70 °C. Let the thermocycler go to 4 °C at the end of the program.

**Purification of aRNA – Timing 1 hr**

14. Add 40 µl nuclease-free water to the aRNA (step 13).
15. Purify the aRNA as stated in **scDam&T Procedure** steps 97-108 but elute in 50 µl instead of 23 µl.
16. Quantify the aRNA by measurement on a Nanodrop spectrophotometer machine and dilute aRNA to 50 ng/µl.

**aRNA fragmentation – Timing 5 min**

17. Take 20 µl of diluted aRNA (step 16) and fragment as stated in **scDam&T Procedure** steps 109-113.

**Purification and quantification of fragmented aRNA – Timing 1 hr 45 min**

18. Purify the aRNA as stated in **scDam&T Procedure** steps 114-125 but elute in 15 µl instead of 13 µl.
19. Quantify the aRNA by measurement on a Nanodrop spectrophotometer machine and dilute to a concentration between 2 and 15 ng/µl for subsequent quantification on a Bioanalyzer RNA pico chip. Run chip according to the instructions of the kit.

**Reverse transcription – Timing 1 hr 30 min**

20. Prepare the randomhexRT mix as indicated in the table below.

| Reagent                    | Amount (µl) | Final concentration in reaction |
|----------------------------|-------------|---------------------------------|
| aRNA (step 19)             | 4           |                                 |
| randomhexRT primer (20 µM) | 1           | 3.33 µM                         |
| dNTP mix (10 mM)           | 1           | 1.66 mM                         |
| Total volume               | 6           |                                 |



21. Heat mix in thermocycler at 65 °C for 5 min with lid at 100 °C. Immediately put on ice.
22. Prepare the RT mix as indicated in the table below. Keep mix on ice and enzymes on ice block at all times.

| Reagent                       | Amount (µl) | Final concentration in reaction |
|-------------------------------|-------------|---------------------------------|
| hexRT mix with aRNA (step 21) | 6           |                                 |
| 5x First strand buffer        | 2           | 1 x                             |
| DTT (0.1 M)                   | 1           | 10 mM                           |
| RNase OUT (40 U/µl)           | 0.5         | 2 U/µl                          |
| Superscript II (200 U/µl)     | 0.5         | 10 U/µl                         |
| Total volume                  | 10          |                                 |

23. Heat mix in thermocycler at 25 °C for 10 min, then 42 °C for 1 hr with the cycler lid at 50 °C. Let the thermocycler go to 4 °C at the end of the program.

#### PCR indexing – **Timing 30 min**

**CRITICAL** PCR amplification must be kept to a minimum to avoid over-amplification. We recommend 6-8 PCR cycles.

24. Prepare the indexing mix as indicated in the table below. Keep mix on ice. Index each sample with a unique RPi primer for multiplexing.

| Reagent                                 | Amount (µl) | Final concentration in reaction |
|-----------------------------------------|-------------|---------------------------------|
| Reverse transcribed material (step 23)  | 10          |                                 |
| Nuclease-free water                     | 11          |                                 |
| 2x NEBNext High-Fidelity PCR Master Mix | 25          | 1x                              |
| RNA PCR primer RP1 (10 µM)              | 2           | 0.4 µM                          |
| RNA PCR index primer RPi (10 µM)        | 2           | 0.4 µM                          |
| Total volume                            | 50          |                                 |

25. Put mix in thermocycler and run PCR program with the lid heated at 105 °C as indicated in the table below.

| Cycle number | Denature | Anneal | Extend |
|--------------|----------|--------|--------|
|--------------|----------|--------|--------|

|      |            |            |              |
|------|------------|------------|--------------|
| 1    | 98°C, 30 s |            |              |
| 2-11 | 98°C, 10 s | 60°C, 30 s | 72°C, 30 s   |
| 12   |            |            | 72°C, 10 min |

**Library purification – Timing 1 hr 30 min**

26. Purify the libraries as stated in **scDam&T Procedure** steps 129-141.
27. Quantify the aRNA by measurement on a Nanodrop spectrophotometer machine and dilute aRNA to 2 ng/μl for quantification on a Bioanalyzer HS DNA chip. Run chip according to the kit manual.

**Library quantification and sequencing – Timing 19 hr**

28. Prepare the libraries for sequencing submission as stated in **scDam&T Procedure** steps 142-145.

**PAUSE POINT** The finished libraries can be kept at -20 °C indefinitely.

## Supplementary Manual

### Molecule after each protocol step – DamID

After ligation of ds DamID adapters (example adapter with barcode 1) 5' → 3'

Fork T7 promoter TSS Illumina P5 sequence UMI barcode UMI barcode  
GGTGATCCGGTAATACGACTCACTATAGGGGTTTCAGAGTTCTACAGTCCGACGATCNNNTGCANNNTATGGA-DNA sequence  
TTCGAGGCCATTATGCTGAGTGATATCCCAAGTCTCAAGATGTCAGGCTGCTAGNNNACGTNNNATACCT-DNA sequence

After IVT 5' → 3'

TSS Illumina P5 sequence UMI barcode UMI barcode  
GGGUUCAGAGUUCUACAGUCCGACGAUCNNNUGCANNNUAUGGA-DNA sequence

After hexRT-mediated RT (library prep) 5' → 3'

By using the random hexRT primer, containing a sequence used as in the RA3 sequence (Illumina Truseq Small RNA) and serving as the P7

TSS Illumina P5 sequence UMI barcode UMI barcode hexRT  
containing P7  
GGGUUCAGAGUUCUACAGUCCGACGAUCNNNUGCANNNUAUGGA-DNA sequence-  
CCCAAGTCTCAAGATGTCAGGCTGCTAGNNNACGTNNNATACCT-DNA sequence-  
NNNNNTGGAATTCTCGGGTGCCAAGGC

After PCR (library prep; example RPi index primer 1) 5' → 3'

By using the universal RPi primer, containing an overlapping sequence with the Illumina P5 sequence in the adapter (Illumina Truseq Small RNA)

By using the indexed RPi primer, containing an overlapping sequence with the P7 sequence of the hexRT, an index, and a sequence to anneal to the flow cell

universal RPi primer Illumina P5 sequence UMI barcode UMI barcode hexRT containing P7  
universal RPi overlapping with P7 sequence (index underlined)  
ATGATACGGCGACCACCGAGATCTACAGTTCAGAGTTCTACAGTCCGATCNNNUGCANNNUAUGGA-DNA sequence-  
NNNNNACCTTAAGAGCCACGGTTCCTTGAGGTCAGTGTAGTGCTAGAGCATAACGGCAGAAGACGAAC  
TACTATGCCGCTGGTGGCTCTAGATGTGCAAGTCTCAAGATGTCAGGCTAGNNNACGTNNNATACCT-DNA sequence-  
NNNNNTGGAATTCTCGGGTGCCAAGGAATCCAGTCACATCAGATCTCGTATGCCGTCTTCTGCTTG

All Illumina Truseq Small RNA sequences can be found at:

[www.nature.com/protocolexchange/system/uploads/6661/original/SupplementaryDocument2-illumina-adapter-sequences-Feb2018.pdf?1530635414](http://www.nature.com/protocolexchange/system/uploads/6661/original/SupplementaryDocument2-illumina-adapter-sequences-Feb2018.pdf?1530635414)

**Molecule after each protocol step – CEL-Seq (as in CEL-Seq2 protocol)**

After annealing of CEL-Seq primer to the mRNA molecule (example primer with barcode 1)  
5' → 3'

polyT barcode UMI barcode UMI Illumina P5 sequence TSS T7 promoter  
mRNA sequence-AAAAAAAAAAAAAAAAAAAAAAAAA  
VTTTTTTTTTTTTTTTTTTTTTTTTTACTNNNGTAGNNNCTAGCAGCCTGACATCTTGAGGATATCACTCAGCATAATGGCCG

After RT with the CEL-Seq primer 5' → 3'

polyT barcode UMI barcode UMI Illumina P5 sequence TSS T7 promoter  
mRNA sequence-AAAAAAAAAAAAAAAAAAAAAAAAA  
mRNA sequence-TTTTTTTTTTTTTTTTTTTTTTTTTTACTNNNGTAGNNNCTAGCAGCCTGACATCTTGAGGATATCACTCAGCATAATGGCCG

After second strand synthesis 5' → 3'

polyT barcode UMI barcode UMI Illumina P5 sequence TSS T7 promoter  
mRNA sequence-AAAAAAAAAAAAAAAAAAAAAAAAAATGANNNCATCNNNGATCGTCGGACTGTAGAACTCCCTATAGTGAGTCGTATTACCGGC  
mRNA sequence-TTTTTTTTTTTTTTTTTTTTTTTTTTACTNNNGTAGNNNCTAGCAGCCTGACATCTTGAGGATATCACTCAGCATAATGGCCG

After IVT 5' → 3'

TSS Illumina P5 sequence UMI barcode UMI barcode  
GGGAGUUCUACAGUCCGACGAUCNNNGAUGNNNUCAU-UUUUUUUUUUUUUUUUUUUUUUUU-mRNA sequence

After hexRT-mediated RT (library prep) 5' → 3'

By using the random hexRT primer, containing a sequence used as in the RA3 sequence (Illumina Truseq Small RNA) and serving as the P7

TSS Illumina P5 sequence UMI barcode UMI barcode  
hexRT containing P7  
GGGAGUUCUACAGUCCGACGAUCNNNGAUGNNNUCAU-UUUUUUUUUUUUUUUUUUUUUUUU  
CCCTCAAGATGTCAGGCTGCTAGNNNCTACNNNAGTA-AAAAAAAAAAAAAAAAAAAAAAAAA-mRNA sequence-  
NNNNNTGGAATTCFCGGGTGCCAAGGC

After PCR (library prep; example RPi index primer 1) 5' → 3'

By using the universal RPi primer, containing an overlapping sequence with the Illumina P5 sequence in the adapter (Illumina Truseq Small RNA)  
By using the indexed RPi primer, containing an overlapping sequence with the P7 sequence of the hexRT, an index, and a sequence to anneal to the flow cell

RPi primer Illumina P5 sequence UMI barcode UMI barcode hexRT containing  
P7 universal RPi overlapping with P7 sequence (index underlined)  
ATGATACGGCGACCACCGAGATCTACACGTTTCAGAGTCTACAGTCCGACGATCNNNGATGNNNTCAT-TTTTTTTTTTTTTTTTTTTTTT-mRNA sequence-  
NNNNNNACCTTAAGAGCCCACGGTTCCTTGAGGTCAGTGTAGTGCCTAGAGCATAACGGCAGAAGACGAAC  
TACTATGCCGCTGGTGGCTCTAGATGTGCAAGTCTCAAGATGTCAGGCTGCTAGNNNCTACNNNAGTA-AAAAAAAAAAAAAAAAAAAAAAAAA-mRNA sequence-  
NNNNNTGGAATTCFCGGGTGCCAAGGAACCTCCAGTCACATCCGATCTCGTATGCCGCTTCTGCTTC

## Supplementary Table 1

1 GCCGGTAATACGACTCACTATAGGGAGTTCTACAGTCCGACGATCANNNGATGNNNTCATTTTTTTTTTTTTTTTTTTTTTTTTV  
2 GCCGGTAATACGACTCACTATAGGGAGTTCTACAGTCCGACGATCANNNTCTCANNCGAGTTTTTTTTTTTTTTTTTTTTTTTTV  
3 GCCGGTAATACGACTCACTATAGGGAGTTCTACAGTCCGACGATCANNNGCCANNNGACATTTTTTTTTTTTTTTTTTTTTTTTTV  
4 GCCGGTAATACGACTCACTATAGGGAGTTCTACAGTCCGACGATCANNNTACGNNNCGGATTTTTTTTTTTTTTTTTTTTTTTTTV  
5 GCCGGTAATACGACTCACTATAGGGAGTTCTACAGTCCGACGATCANNNGCAGNNNTCGTTTTTTTTTTTTTTTTTTTTTTTTV  
6 GCCGGTAATACGACTCACTATAGGGAGTTCTACAGTCCGACGATCANNNAGCANNNAGTTTTTTTTTTTTTTTTTTTTTTTTV  
7 GCCGGTAATACGACTCACTATAGGGAGTTCTACAGTCCGACGATCANNNTCTCANNNGATGTTTTTTTTTTTTTTTTTTTTTTTTV  
8 GCCGGTAATACGACTCACTATAGGGAGTTCTACAGTCCGACGATCANNNTCACNNNATGATTTTTTTTTTTTTTTTTTTTTTTTTV  
9 GCCGGTAATACGACTCACTATAGGGAGTTCTACAGTCCGACGATCANNNCTCANNNGCGTTTTTTTTTTTTTTTTTTTTTTTTV  
10 GCCGGTAATACGACTCACTATAGGGAGTTCTACAGTCCGACGATCANNNCACANNNGCGTTTTTTTTTTTTTTTTTTTTTTTTV  
11 GCCGGTAATACGACTCACTATAGGGAGTTCTACAGTCCGACGATCANNNATCANNNGAACTTTTTTTTTTTTTTTTTTTTTTTTV  
12 GCCGGTAATACGACTCACTATAGGGAGTTCTACAGTCCGACGATCANNNGCTNNNCTCTTTTTTTTTTTTTTTTTTTTTTTTTV  
13 GCCGGTAATACGACTCACTATAGGGAGTTCTACAGTCCGACGATCANNNGTANNNAGTCTTTTTTTTTTTTTTTTTTTTTTTTTV  
14 GCCGGTAATACGACTCACTATAGGGAGTTCTACAGTCCGACGATCANNNTGGANNNTACATTTTTTTTTTTTTTTTTTTTTTTTTV  
15 GCCGGTAATACGACTCACTATAGGGAGTTCTACAGTCCGACGATCANNNGTTCNNNCTGTTTTTTTTTTTTTTTTTTTTTTTTV  
16 GCCGGTAATACGACTCACTATAGGGAGTTCTACAGTCCGACGATCANNNGTCANNNGCTTTTTTTTTTTTTTTTTTTTTTTTTV  
17 GCCGGTAATACGACTCACTATAGGGAGTTCTACAGTCCGACGATCANNNCTACNNNATCTTTTTTTTTTTTTTTTTTTTTTTTTV  
18 GCCGGTAATACGACTCACTATAGGGAGTTCTACAGTCCGACGATCANNNGACTNNNTACTTTTTTTTTTTTTTTTTTTTTTTTTV  
19 GCCGGTAATACGACTCACTATAGGGAGTTCTACAGTCCGACGATCANNNCTATNNNGCGCTTTTTTTTTTTTTTTTTTTTTTTTTV  
20 GCCGGTAATACGACTCACTATAGGGAGTTCTACAGTCCGACGATCANNNTCGANNNCTAGTTTTTTTTTTTTTTTTTTTTTTTTV  
21 GCCGGTAATACGACTCACTATAGGGAGTTCTACAGTCCGACGATCANNNCACTNNNACCTTTTTTTTTTTTTTTTTTTTTTTTTV  
22 GCCGGTAATACGACTCACTATAGGGAGTTCTACAGTCCGACGATCANNNTCATNNNGTGTTTTTTTTTTTTTTTTTTTTTTTTTV  
23 GCCGGTAATACGACTCACTATAGGGAGTTCTACAGTCCGACGATCANNNCTGANNNAGAGTTTTTTTTTTTTTTTTTTTTTTTTV  
24 GCCGGTAATACGACTCACTATAGGGAGTTCTACAGTCCGACGATCANNNCTGTNNNTAGTTTTTTTTTTTTTTTTTTTTTTTTV  
25 GCCGGTAATACGACTCACTATAGGGAGTTCTACAGTCCGACGATCANNNGCAGNNNGTCTTTTTTTTTTTTTTTTTTTTTTTTTV  
26 GCCGGTAATACGACTCACTATAGGGAGTTCTACAGTCCGACGATCANNNTACTNNNCTCTTTTTTTTTTTTTTTTTTTTTTTTTV  
27 GCCGGTAATACGACTCACTATAGGGAGTTCTACAGTCCGACGATCANNNTACANNNCTCTTTTTTTTTTTTTTTTTTTTTTTTTV  
28 GCCGGTAATACGACTCACTATAGGGAGTTCTACAGTCCGACGATCANNNGCATNNNGCTGTTTTTTTTTTTTTTTTTTTTTTTTV  
29 GCCGGTAATACGACTCACTATAGGGAGTTCTACAGTCCGACGATCANNNCACGNNNATAGTTTTTTTTTTTTTTTTTTTTTTTTV  
30 GCCGGTAATACGACTCACTATAGGGAGTTCTACAGTCCGACGATCANNNATCGNNNGCTGTTTTTTTTTTTTTTTTTTTTTTTTV  
31 GCCGGTAATACGACTCACTATAGGGAGTTCTACAGTCCGACGATCANNNGTGANNNTGGATTTTTTTTTTTTTTTTTTTTTTTTTV  
32 GCCGGTAATACGACTCACTATAGGGAGTTCTACAGTCCGACGATCANNNATCTNNNGTAGTTTTTTTTTTTTTTTTTTTTTTTTV  
33 GCCGGTAATACGACTCACTATAGGGAGTTCTACAGTCCGACGATCANNNGCCANNNCAACTTTTTTTTTTTTTTTTTTTTTTTTTV  
34 GCCGGTAATACGACTCACTATAGGGAGTTCTACAGTCCGACGATCANNNAGACNNNCAACTTTTTTTTTTTTTTTTTTTTTTTTTV  
35 GCCGGTAATACGACTCACTATAGGGAGTTCTACAGTCCGACGATCANNNAGCANNNGAGATTTTTTTTTTTTTTTTTTTTTTTTTV  
36 GCCGGTAATACGACTCACTATAGGGAGTTCTACAGTCCGACGATCANNNGCAGNNNAGCTTTTTTTTTTTTTTTTTTTTTTTTTV  
37 GCCGGTAATACGACTCACTATAGGGAGTTCTACAGTCCGACGATCANNNCAGTNNNCATGTTTTTTTTTTTTTTTTTTTTTTTTV  
38 GCCGGTAATACGACTCACTATAGGGAGTTCTACAGTCCGACGATCANNNCATCANNCTGCTTTTTTTTTTTTTTTTTTTTTTTTTV  
39 GCCGGTAATACGACTCACTATAGGGAGTTCTACAGTCCGACGATCANNNAGTGNNNTAGATTTTTTTTTTTTTTTTTTTTTTTTTV  
40 GCCGGTAATACGACTCACTATAGGGAGTTCTACAGTCCGACGATCANNNTGATNNNTCTCTTTTTTTTTTTTTTTTTTTTTTTTTV  
41 GCCGGTAATACGACTCACTATAGGGAGTTCTACAGTCCGACGATCANNNGCCTNNNTGCATTTTTTTTTTTTTTTTTTTTTTTTTV  
42 GCCGGTAATACGACTCACTATAGGGAGTTCTACAGTCCGACGATCANNNAGCGNNNCAAGTTTTTTTTTTTTTTTTTTTTTTTTV  
43 GCCGGTAATACGACTCACTATAGGGAGTTCTACAGTCCGACGATCANNNAGCGNNNACCATTTTTTTTTTTTTTTTTTTTTTTTTV  
44 GCCGGTAATACGACTCACTATAGGGAGTTCTACAGTCCGACGATCANNNAGACNNNCTGATTTTTTTTTTTTTTTTTTTTTTTTTV  
45 GCCGGTAATACGACTCACTATAGGGAGTTCTACAGTCCGACGATCANNNAGGANNNGATGTTTTTTTTTTTTTTTTTTTTTTTTV  
46 GCCGGTAATACGACTCACTATAGGGAGTTCTACAGTCCGACGATCANNNGCGNNNCTTATTTTTTTTTTTTTTTTTTTTTTTTTV

47 GCCGGTAATACGACTCACTATAGGGAGTTCTACAGTCCGACGATCNNNGCGANNNATGCTTTTTTTTTTTTTTTTTTTTTTTTTV  
48 GCCGGTAATACGACTCACTATAGGGAGTTCTACAGTCCGACGATCNNNATAGNNNTAGCTTTTTTTTTTTTTTTTTTTTTTTTTV  
49 GCCGGTAATACGACTCACTATAGGGAGTTCTACAGTCCGACGATCNNNCTGANNNGATTTTTTTTTTTTTTTTTTTTTTTTTV  
50 GCCGGTAATACGACTCACTATAGGGAGTTCTACAGTCCGACGATCNNNGAACNNNCTATTTTTTTTTTTTTTTTTTTTTTTTTV  
51 GCCGGTAATACGACTCACTATAGGGAGTTCTACAGTCCGACGATCNNNTAAGNNNGCGTTTTTTTTTTTTTTTTTTTTTTTTV  
52 GCCGGTAATACGACTCACTATAGGGAGTTCTACAGTCCGACGATCNNNGAATNNNCTCATTTTTTTTTTTTTTTTTTTTTTTTTV  
53 GCCGGTAATACGACTCACTATAGGGAGTTCTACAGTCCGACGATCNNNGCGTNNNGTGATTTTTTTTTTTTTTTTTTTTTTTTTV  
54 GCCGGTAATACGACTCACTATAGGGAGTTCTACAGTCCGACGATCNNNCACANNNTAACTTTTTTTTTTTTTTTTTTTTTTTTV  
55 GCCGGTAATACGACTCACTATAGGGAGTTCTACAGTCCGACGATCNNNTATGNNNGCCATTTTTTTTTTTTTTTTTTTTTTTTTV  
56 GCCGGTAATACGACTCACTATAGGGAGTTCTACAGTCCGACGATCNNNTCCTNNNGCGTTTTTTTTTTTTTTTTTTTTTTTTV  
57 GCCGGTAATACGACTCACTATAGGGAGTTCTACAGTCCGACGATCNNNGCTGNNNGTCATTTTTTTTTTTTTTTTTTTTTTTTTV  
58 GCCGGTAATACGACTCACTATAGGGAGTTCTACAGTCCGACGATCNNNGCTCNNNCTAATTTTTTTTTTTTTTTTTTTTTTTTTV  
59 GCCGGTAATACGACTCACTATAGGGAGTTCTACAGTCCGACGATCNNNTCTGNNNTCTATTTTTTTTTTTTTTTTTTTTTTTTTV  
60 GCCGGTAATACGACTCACTATAGGGAGTTCTACAGTCCGACGATCNNNTACTNNNAGGTTTTTTTTTTTTTTTTTTTTTTTTV  
61 GCCGGTAATACGACTCACTATAGGGAGTTCTACAGTCCGACGATCNNNACAGNNNCATTTTTTTTTTTTTTTTTTTTTTTTTV  
62 GCCGGTAATACGACTCACTATAGGGAGTTCTACAGTCCGACGATCNNNTAGCNNNCAATTTTTTTTTTTTTTTTTTTTTTTTTV  
63 GCCGGTAATACGACTCACTATAGGGAGTTCTACAGTCCGACGATCNNNGAATNNNTGGATTTTTTTTTTTTTTTTTTTTTTTTTV  
64 GCCGGTAATACGACTCACTATAGGGAGTTCTACAGTCCGACGATCNNNTATANNNGCAGTTTTTTTTTTTTTTTTTTTTTTTTV  
65 GCCGGTAATACGACTCACTATAGGGAGTTCTACAGTCCGACGATCNNNTATCNNNACGTTTTTTTTTTTTTTTTTTTTTTTTV  
66 GCCGGTAATACGACTCACTATAGGGAGTTCTACAGTCCGACGATCNNNGCATNNNATAGTTTTTTTTTTTTTTTTTTTTTTTTV  
67 GCCGGTAATACGACTCACTATAGGGAGTTCTACAGTCCGACGATCNNNCAGANNNGTAGTTTTTTTTTTTTTTTTTTTTTTTTV  
68 GCCGGTAATACGACTCACTATAGGGAGTTCTACAGTCCGACGATCNNNGCGCTNNNTGTGTTTTTTTTTTTTTTTTTTTTTTTTV  
69 GCCGGTAATACGACTCACTATAGGGAGTTCTACAGTCCGACGATCNNNGAATNNNCAGTTTTTTTTTTTTTTTTTTTTTTTTV  
70 GCCGGTAATACGACTCACTATAGGGAGTTCTACAGTCCGACGATCNNNGGACNNNAGAGTTTTTTTTTTTTTTTTTTTTTTTTV  
71 GCCGGTAATACGACTCACTATAGGGAGTTCTACAGTCCGACGATCNNNCACANNNAGATTTTTTTTTTTTTTTTTTTTTTTTTV  
72 GCCGGTAATACGACTCACTATAGGGAGTTCTACAGTCCGACGATCNNNCTTGNNNTCTTTTTTTTTTTTTTTTTTTTTTTTTV  
73 GCCGGTAATACGACTCACTATAGGGAGTTCTACAGTCCGACGATCNNNAGGTNNNCGTGTTTTTTTTTTTTTTTTTTTTTTTTV  
74 GCCGGTAATACGACTCACTATAGGGAGTTCTACAGTCCGACGATCNNNCAACNNNCTTATTTTTTTTTTTTTTTTTTTTTTTTTV  
75 GCCGGTAATACGACTCACTATAGGGAGTTCTACAGTCCGACGATCNNNAGCTNNNTGCTTTTTTTTTTTTTTTTTTTTTTTTTV  
76 GCCGGTAATACGACTCACTATAGGGAGTTCTACAGTCCGACGATCNNNTACGNNNGAGCTTTTTTTTTTTTTTTTTTTTTTTTTV  
77 GCCGGTAATACGACTCACTATAGGGAGTTCTACAGTCCGACGATCNNNAGCANNNCACCTTTTTTTTTTTTTTTTTTTTTTTTTV  
78 GCCGGTAATACGACTCACTATAGGGAGTTCTACAGTCCGACGATCNNNTCCGNNNTAACTTTTTTTTTTTTTTTTTTTTTTTTV  
79 GCCGGTAATACGACTCACTATAGGGAGTTCTACAGTCCGACGATCNNNTCGTNNNCGTATTTTTTTTTTTTTTTTTTTTTTTTTV  
80 GCCGGTAATACGACTCACTATAGGGAGTTCTACAGTCCGACGATCNNNGATCNNNTGCGTTTTTTTTTTTTTTTTTTTTTTTTV  
81 GCCGGTAATACGACTCACTATAGGGAGTTCTACAGTCCGACGATCNNNCACGNNNGATTTTTTTTTTTTTTTTTTTTTTTTTV  
82 GCCGGTAATACGACTCACTATAGGGAGTTCTACAGTCCGACGATCNNNTGGCNNNCTCATTTTTTTTTTTTTTTTTTTTTTTTTV  
83 GCCGGTAATACGACTCACTATAGGGAGTTCTACAGTCCGACGATCNNNACTCNNNTCCTTTTTTTTTTTTTTTTTTTTTTTTTV  
84 GCCGGTAATACGACTCACTATAGGGAGTTCTACAGTCCGACGATCNNNGTCGNNNTGGTTTTTTTTTTTTTTTTTTTTTTTTV  
85 GCCGGTAATACGACTCACTATAGGGAGTTCTACAGTCCGACGATCNNNATAGNNNGCATTTTTTTTTTTTTTTTTTTTTTTTTV  
86 GCCGGTAATACGACTCACTATAGGGAGTTCTACAGTCCGACGATCNNNTGGANNNGTCTTTTTTTTTTTTTTTTTTTTTTTTTV  
87 GCCGGTAATACGACTCACTATAGGGAGTTCTACAGTCCGACGATCNNNCGGTNNNACAGTTTTTTTTTTTTTTTTTTTTTTTTV  
88 GCCGGTAATACGACTCACTATAGGGAGTTCTACAGTCCGACGATCNNNGCACNNNACATTTTTTTTTTTTTTTTTTTTTTTTTV  
89 GCCGGTAATACGACTCACTATAGGGAGTTCTACAGTCCGACGATCNNNCTCANNNTCAATTTTTTTTTTTTTTTTTTTTTTTTTV  
90 GCCGGTAATACGACTCACTATAGGGAGTTCTACAGTCCGACGATCNNNTCTCANNNTCTTTTTTTTTTTTTTTTTTTTTTTTTV  
91 GCCGGTAATACGACTCACTATAGGGAGTTCTACAGTCCGACGATCNNNCTGANNNGTGCTTTTTTTTTTTTTTTTTTTTTTTTTV  
92 GCCGGTAATACGACTCACTATAGGGAGTTCTACAGTCCGACGATCNNNGCGTNNNCTATTTTTTTTTTTTTTTTTTTTTTTTTV  
93 GCCGGTAATACGACTCACTATAGGGAGTTCTACAGTCCGACGATCNNNTCCANNNACTATTTTTTTTTTTTTTTTTTTTTTTTTV  
94 GCCGGTAATACGACTCACTATAGGGAGTTCTACAGTCCGACGATCNNNTACTNNNTGAGTTTTTTTTTTTTTTTTTTTTTTTTV

95 GCCGGTAATACGACTCACTATAGGGAGTTCTACAGTCCGACGATCNNNACGTNNNGTTGTTTTTTTTTTTTTTTTTTTTTTTTV  
96 GCCGGTAATACGACTCACTATAGGGAGTTCTACAGTCCGACGATCNNNGACTNNNAGCGTTTTTTTTTTTTTTTTTTTTTTTTV  
97 GCCGGTAATACGACTCACTATAGGGAGTTCTACAGTCCGACGATCNNNCATANNNGTCATTTTTTTTTTTTTTTTTTTTTTTTTV  
98 GCCGGTAATACGACTCACTATAGGGAGTTCTACAGTCCGACGATCNNNCAGTNNNGTTATTTTTTTTTTTTTTTTTTTTTTTTTV  
99 GCCGGTAATACGACTCACTATAGGGAGTTCTACAGTCCGACGATCNNNATGANNNGTCGTTTTTTTTTTTTTTTTTTTTTTTTV  
100 GCCGGTAATACGACTCACTATAGGGAGTTCTACAGTCCGACGATCNNNACGTNNNACCTTTTTTTTTTTTTTTTTTTTTTTTTV  
101 GCCGGTAATACGACTCACTATAGGGAGTTCTACAGTCCGACGATCNNNAGTGNNNGTTATTTTTTTTTTTTTTTTTTTTTTTTTV  
102 GCCGGTAATACGACTCACTATAGGGAGTTCTACAGTCCGACGATCNNNACCTNNNGTCTTTTTTTTTTTTTTTTTTTTTTTTTV  
103 GCCGGTAATACGACTCACTATAGGGAGTTCTACAGTCCGACGATCNNNCGGANNNGTGATTTTTTTTTTTTTTTTTTTTTTTTTV  
104 GCCGGTAATACGACTCACTATAGGGAGTTCTACAGTCCGACGATCNNNGTTCNNNTATCTTTTTTTTTTTTTTTTTTTTTTTTTV  
105 GCCGGTAATACGACTCACTATAGGGAGTTCTACAGTCCGACGATCNNNGTCANNNTACCTTTTTTTTTTTTTTTTTTTTTTTTTV  
106 GCCGGTAATACGACTCACTATAGGGAGTTCTACAGTCCGACGATCNNNGTAGNNNCTACTTTTTTTTTTTTTTTTTTTTTTTTTV  
107 GCCGGTAATACGACTCACTATAGGGAGTTCTACAGTCCGACGATCNNNGCCTNNNACGTTTTTTTTTTTTTTTTTTTTTTTTV  
108 GCCGGTAATACGACTCACTATAGGGAGTTCTACAGTCCGACGATCNNNCTTANNNGCCGTTTTTTTTTTTTTTTTTTTTTTTTV  
109 GCCGGTAATACGACTCACTATAGGGAGTTCTACAGTCCGACGATCNNNATCGNNNATCGTTTTTTTTTTTTTTTTTTTTTTTTV  
110 GCCGGTAATACGACTCACTATAGGGAGTTCTACAGTCCGACGATCNNNCGTANNNTAGCTTTTTTTTTTTTTTTTTTTTTTTTTV  
111 GCCGGTAATACGACTCACTATAGGGAGTTCTACAGTCCGACGATCNNNGTCTNNNCGAGTTTTTTTTTTTTTTTTTTTTTTTTV  
112 GCCGGTAATACGACTCACTATAGGGAGTTCTACAGTCCGACGATCNNNATCANNNTCTTTTTTTTTTTTTTTTTTTTTTTTTV  
113 GCCGGTAATACGACTCACTATAGGGAGTTCTACAGTCCGACGATCNNNGCTANNNAGATTTTTTTTTTTTTTTTTTTTTTTTTV  
114 GCCGGTAATACGACTCACTATAGGGAGTTCTACAGTCCGACGATCNNNGAACNNNTCTTTTTTTTTTTTTTTTTTTTTTTTTV  
115 GCCGGTAATACGACTCACTATAGGGAGTTCTACAGTCCGACGATCNNNGTATNNNTCACTTTTTTTTTTTTTTTTTTTTTTTTV  
116 GCCGGTAATACGACTCACTATAGGGAGTTCTACAGTCCGACGATCNNNCTTGNNNTGGCTTTTTTTTTTTTTTTTTTTTTTTTTV  
117 GCCGGTAATACGACTCACTATAGGGAGTTCTACAGTCCGACGATCNNNCGTANNNACATTTTTTTTTTTTTTTTTTTTTTTTTV  
118 GCCGGTAATACGACTCACTATAGGGAGTTCTACAGTCCGACGATCNNNTGCGNNNACGTTTTTTTTTTTTTTTTTTTTTTTTV  
119 GCCGGTAATACGACTCACTATAGGGAGTTCTACAGTCCGACGATCNNNGATGNNNGATGTTTTTTTTTTTTTTTTTTTTTTTTV  
120 GCCGGTAATACGACTCACTATAGGGAGTTCTACAGTCCGACGATCNNNCGCGNNNTATCTTTTTTTTTTTTTTTTTTTTTTTTTV  
121 GCCGGTAATACGACTCACTATAGGGAGTTCTACAGTCCGACGATCNNNTCGANNNAGACTTTTTTTTTTTTTTTTTTTTTTTTTV  
122 GCCGGTAATACGACTCACTATAGGGAGTTCTACAGTCCGACGATCNNNAGGCNNNCTAGTTTTTTTTTTTTTTTTTTTTTTTTV  
123 GCCGGTAATACGACTCACTATAGGGAGTTCTACAGTCCGACGATCNNNGAGCNNNCGAATTTTTTTTTTTTTTTTTTTTTTTTTV  
124 GCCGGTAATACGACTCACTATAGGGAGTTCTACAGTCCGACGATCNNNTGTGNNNGAAGTTTTTTTTTTTTTTTTTTTTTTTTV  
125 GCCGGTAATACGACTCACTATAGGGAGTTCTACAGTCCGACGATCNNNGTAGNNNTCCGTTTTTTTTTTTTTTTTTTTTTTTTV  
126 GCCGGTAATACGACTCACTATAGGGAGTTCTACAGTCCGACGATCNNNGTATNNNGTCTTTTTTTTTTTTTTTTTTTTTTTTTV  
127 GCCGGTAATACGACTCACTATAGGGAGTTCTACAGTCCGACGATCNNNACGTNNNCACATTTTTTTTTTTTTTTTTTTTTTTTTV  
128 GCCGGTAATACGACTCACTATAGGGAGTTCTACAGTCCGACGATCNNNGTGCNNNATAATTTTTTTTTTTTTTTTTTTTTTTTTV  
129 GCCGGTAATACGACTCACTATAGGGAGTTCTACAGTCCGACGATCNNNCTCANNNCAGATTTTTTTTTTTTTTTTTTTTTTTTTV  
130 GCCGGTAATACGACTCACTATAGGGAGTTCTACAGTCCGACGATCNNNCACTNNNGTATTTTTTTTTTTTTTTTTTTTTTTTTV  
131 GCCGGTAATACGACTCACTATAGGGAGTTCTACAGTCCGACGATCNNNACCTNNNTACGTTTTTTTTTTTTTTTTTTTTTTTTV  
132 GCCGGTAATACGACTCACTATAGGGAGTTCTACAGTCCGACGATCNNNCAGTNNNTCACTTTTTTTTTTTTTTTTTTTTTTTTV  
133 GCCGGTAATACGACTCACTATAGGGAGTTCTACAGTCCGACGATCNNNATCTNNNTCGATTTTTTTTTTTTTTTTTTTTTTTTTV  
134 GCCGGTAATACGACTCACTATAGGGAGTTCTACAGTCCGACGATCNNNGTGTNNNATCTTTTTTTTTTTTTTTTTTTTTTTTTV  
135 GCCGGTAATACGACTCACTATAGGGAGTTCTACAGTCCGACGATCNNNGTGTNNNGTAGTTTTTTTTTTTTTTTTTTTTTTTTV  
136 GCCGGTAATACGACTCACTATAGGGAGTTCTACAGTCCGACGATCNNNCTGANNNACCATTTTTTTTTTTTTTTTTTTTTTTTTV  
137 GCCGGTAATACGACTCACTATAGGGAGTTCTACAGTCCGACGATCNNNGTCGNNNACCTTTTTTTTTTTTTTTTTTTTTTTTTV  
138 GCCGGTAATACGACTCACTATAGGGAGTTCTACAGTCCGACGATCNNNGTGTNNNATGATTTTTTTTTTTTTTTTTTTTTTTTTV  
139 GCCGGTAATACGACTCACTATAGGGAGTTCTACAGTCCGACGATCNNNCTATNNNTCCTTTTTTTTTTTTTTTTTTTTTTTTTV  
140 GCCGGTAATACGACTCACTATAGGGAGTTCTACAGTCCGACGATCNNNCTTANNNCATTTTTTTTTTTTTTTTTTTTTTTTTV  
141 GCCGGTAATACGACTCACTATAGGGAGTTCTACAGTCCGACGATCNNNAGACNNNTCCATTTTTTTTTTTTTTTTTTTTTTTTTV  
142 GCCGGTAATACGACTCACTATAGGGAGTTCTACAGTCCGACGATCNNNAGTCNNNGCAGTTTTTTTTTTTTTTTTTTTTTTTTV

143 GCCGGTAATACGACTCACTATAGGGAGTTCTACAGTCCGACGATCENNNTAGCENNNTGCTTTTTTTTTTTTTTTTTTTTTTTTTV  
144 GCCGGTAATACGACTCACTATAGGGAGTTCTACAGTCCGACGATCENNNTATANNNGACCTTTTTTTTTTTTTTTTTTTTTTTTTV  
145 GCCGGTAATACGACTCACTATAGGGAGTTCTACAGTCCGACGATCENNAGGTNNNTCTTTTTTTTTTTTTTTTTTTTTTTTTV  
146 GCCGGTAATACGACTCACTATAGGGAGTTCTACAGTCCGACGATCENNNTGATNNNAGGATTTTTTTTTTTTTTTTTTTTTTTTTV  
147 GCCGGTAATACGACTCACTATAGGGAGTTCTACAGTCCGACGATCENNATCGNNNGAGTTTTTTTTTTTTTTTTTTTTTTTTV  
148 GCCGGTAATACGACTCACTATAGGGAGTTCTACAGTCCGACGATCENNNTGTCNNNATAGTTTTTTTTTTTTTTTTTTTTTTTTV  
149 GCCGGTAATACGACTCACTATAGGGAGTTCTACAGTCCGACGATCENNNTCGCENNNACTCTTTTTTTTTTTTTTTTTTTTTTTTTV  
150 GCCGGTAATACGACTCACTATAGGGAGTTCTACAGTCCGACGATCENNNGACNNNATCTTTTTTTTTTTTTTTTTTTTTTTTTV  
151 GCCGGTAATACGACTCACTATAGGGAGTTCTACAGTCCGACGATCENNNGAATNNNGCATTTTTTTTTTTTTTTTTTTTTTTTTV  
152 GCCGGTAATACGACTCACTATAGGGAGTTCTACAGTCCGACGATCENNNTATGNNNTGGTTTTTTTTTTTTTTTTTTTTTTTTV  
153 GCCGGTAATACGACTCACTATAGGGAGTTCTACAGTCCGACGATCENNNGTCGNNNCATCTTTTTTTTTTTTTTTTTTTTTTTTTV  
154 GCCGGTAATACGACTCACTATAGGGAGTTCTACAGTCCGACGATCENNNGTGNNNAGCATTTTTTTTTTTTTTTTTTTTTTTTTV  
155 GCCGGTAATACGACTCACTATAGGGAGTTCTACAGTCCGACGATCENNNTCAGNNNGATTTTTTTTTTTTTTTTTTTTTTTTTV  
156 GCCGGTAATACGACTCACTATAGGGAGTTCTACAGTCCGACGATCENNACACNNNGTAATTTTTTTTTTTTTTTTTTTTTTTTTV  
157 GCCGGTAATACGACTCACTATAGGGAGTTCTACAGTCCGACGATCENNNGACGNNNTCCATTTTTTTTTTTTTTTTTTTTTTTTTV  
158 GCCGGTAATACGACTCACTATAGGGAGTTCTACAGTCCGACGATCENNNGTAGNNNTGAATTTTTTTTTTTTTTTTTTTTTTTTTV  
159 GCCGGTAATACGACTCACTATAGGGAGTTCTACAGTCCGACGATCENNNGCGANNNTCAATTTTTTTTTTTTTTTTTTTTTTTTTV  
160 GCCGGTAATACGACTCACTATAGGGAGTTCTACAGTCCGACGATCENNAGGTNNNCAATTTTTTTTTTTTTTTTTTTTTTTTTV  
161 GCCGGTAATACGACTCACTATAGGGAGTTCTACAGTCCGACGATCENNNTGTANNNGTCTTTTTTTTTTTTTTTTTTTTTTTTTV  
162 GCCGGTAATACGACTCACTATAGGGAGTTCTACAGTCCGACGATCENNNGCAGNNNTAAGTTTTTTTTTTTTTTTTTTTTTTTTV  
163 GCCGGTAATACGACTCACTATAGGGAGTTCTACAGTCCGACGATCENNNGAGANNNTATGTTTTTTTTTTTTTTTTTTTTTTTTV  
164 GCCGGTAATACGACTCACTATAGGGAGTTCTACAGTCCGACGATCENNNTGAGNNNTACCTTTTTTTTTTTTTTTTTTTTTTTTTV  
165 GCCGGTAATACGACTCACTATAGGGAGTTCTACAGTCCGACGATCENNATAGNNNACTCTTTTTTTTTTTTTTTTTTTTTTTTTV  
166 GCCGGTAATACGACTCACTATAGGGAGTTCTACAGTCCGACGATCENNNTGGTNNNCACGTTTTTTTTTTTTTTTTTTTTTTTTV  
167 GCCGGTAATACGACTCACTATAGGGAGTTCTACAGTCCGACGATCENNNGCTCENNNGCAATTTTTTTTTTTTTTTTTTTTTTTTTV  
168 GCCGGTAATACGACTCACTATAGGGAGTTCTACAGTCCGACGATCENNNCACGNNNTCGTTTTTTTTTTTTTTTTTTTTTTTTV  
169 GCCGGTAATACGACTCACTATAGGGAGTTCTACAGTCCGACGATCENNATTCNNNACCGTTTTTTTTTTTTTTTTTTTTTTTTV  
170 GCCGGTAATACGACTCACTATAGGGAGTTCTACAGTCCGACGATCENNNTTCNNNGTTATTTTTTTTTTTTTTTTTTTTTTTTTV  
171 GCCGGTAATACGACTCACTATAGGGAGTTCTACAGTCCGACGATCENNNGTCTNNNTCTTTTTTTTTTTTTTTTTTTTTTTTTV  
172 GCCGGTAATACGACTCACTATAGGGAGTTCTACAGTCCGACGATCENNNTCATNNNGCAATTTTTTTTTTTTTTTTTTTTTTTTTV  
173 GCCGGTAATACGACTCACTATAGGGAGTTCTACAGTCCGACGATCENNNTCTGNNNTACATTTTTTTTTTTTTTTTTTTTTTTTTV  
174 GCCGGTAATACGACTCACTATAGGGAGTTCTACAGTCCGACGATCENNNGTTGNNNACACTTTTTTTTTTTTTTTTTTTTTTTTTV  
175 GCCGGTAATACGACTCACTATAGGGAGTTCTACAGTCCGACGATCENNAGACNNNGCTTTTTTTTTTTTTTTTTTTTTTTTTV  
176 GCCGGTAATACGACTCACTATAGGGAGTTCTACAGTCCGACGATCENNNTCATNNNCGGCTTTTTTTTTTTTTTTTTTTTTTTTTV  
177 GCCGGTAATACGACTCACTATAGGGAGTTCTACAGTCCGACGATCENNNGCATNNNCATATTTTTTTTTTTTTTTTTTTTTTTTTV  
178 GCCGGTAATACGACTCACTATAGGGAGTTCTACAGTCCGACGATCENNACCGNNNGTATTTTTTTTTTTTTTTTTTTTTTTTTV  
179 GCCGGTAATACGACTCACTATAGGGAGTTCTACAGTCCGACGATCENNCGGCNNNTAAGTTTTTTTTTTTTTTTTTTTTTTTTV  
180 GCCGGTAATACGACTCACTATAGGGAGTTCTACAGTCCGACGATCENNNTCANNNNTGTATTTTTTTTTTTTTTTTTTTTTTTTTV  
181 GCCGGTAATACGACTCACTATAGGGAGTTCTACAGTCCGACGATCENNNCATGNNNCACGTTTTTTTTTTTTTTTTTTTTTTTTV  
182 GCCGGTAATACGACTCACTATAGGGAGTTCTACAGTCCGACGATCENNNGTGANNNAGCCTTTTTTTTTTTTTTTTTTTTTTTTTV  
183 GCCGGTAATACGACTCACTATAGGGAGTTCTACAGTCCGACGATCENNNGCCTNNNCATGTTTTTTTTTTTTTTTTTTTTTTTTV  
184 GCCGGTAATACGACTCACTATAGGGAGTTCTACAGTCCGACGATCENNNCATCENNNTGGATTTTTTTTTTTTTTTTTTTTTTTTTV  
185 GCCGGTAATACGACTCACTATAGGGAGTTCTACAGTCCGACGATCENNNGCCGNNNCTAATTTTTTTTTTTTTTTTTTTTTTTTTV  
186 GCCGGTAATACGACTCACTATAGGGAGTTCTACAGTCCGACGATCENNAGGCNNNATATTTTTTTTTTTTTTTTTTTTTTTTTV  
187 GCCGGTAATACGACTCACTATAGGGAGTTCTACAGTCCGACGATCENNNGTGANNNGTATTTTTTTTTTTTTTTTTTTTTTTTTV  
188 GCCGGTAATACGACTCACTATAGGGAGTTCTACAGTCCGACGATCENNNTTCNNNCTCGTTTTTTTTTTTTTTTTTTTTTTTTV  
189 GCCGGTAATACGACTCACTATAGGGAGTTCTACAGTCCGACGATCENNNCAGCNNNTATATTTTTTTTTTTTTTTTTTTTTTTTTV  
190 GCCGGTAATACGACTCACTATAGGGAGTTCTACAGTCCGACGATCENNNGGANNNCAACTTTTTTTTTTTTTTTTTTTTTTTTTV



191 GCCGGTAATACGACTCACTATAGGGAGTTCTACAGTCCGACGATCNNNCATANNNTCTGTTTTTTTTTTTTTTTTTTTTTTTTV  
192 GCCGGTAATACGACTCACTATAGGGAGTTCTACAGTCCGACGATCNNNCAGCNNNATCCTTTTTTTTTTTTTTTTTTTTTTTTTV  
193 GCCGGTAATACGACTCACTATAGGGAGTTCTACAGTCCGACGATCNNNAGATNNNGAAGTTTTTTTTTTTTTTTTTTTTTTTTV  
194 GCCGGTAATACGACTCACTATAGGGAGTTCTACAGTCCGACGATCNNNTAATNNNGTCGTTTTTTTTTTTTTTTTTTTTTTTTV  
195 GCCGGTAATACGACTCACTATAGGGAGTTCTACAGTCCGACGATCNNNCGCTNNNATGATTTTTTTTTTTTTTTTTTTTTTTTTV  
196 GCCGGTAATACGACTCACTATAGGGAGTTCTACAGTCCGACGATCNNNGAATNNNGTCTTTTTTTTTTTTTTTTTTTTTTTTTV  
197 GCCGGTAATACGACTCACTATAGGGAGTTCTACAGTCCGACGATCNNNACATNNNGAGATTTTTTTTTTTTTTTTTTTTTTTTTV  
198 GCCGGTAATACGACTCACTATAGGGAGTTCTACAGTCCGACGATCNNNTACGNNNTATGTTTTTTTTTTTTTTTTTTTTTTTTV  
199 GCCGGTAATACGACTCACTATAGGGAGTTCTACAGTCCGACGATCNNNGATCNNNCAACTTTTTTTTTTTTTTTTTTTTTTTTTV  
200 GCCGGTAATACGACTCACTATAGGGAGTTCTACAGTCCGACGATCNNNGTGCNNNGTGTTTTTTTTTTTTTTTTTTTTTTTTTV  
201 GCCGGTAATACGACTCACTATAGGGAGTTCTACAGTCCGACGATCNNNTGGTNNNAGATTTTTTTTTTTTTTTTTTTTTTTTTV  
202 GCCGGTAATACGACTCACTATAGGGAGTTCTACAGTCCGACGATCNNNCGAGNNNCTAGTTTTTTTTTTTTTTTTTTTTTTTTV  
203 GCCGGTAATACGACTCACTATAGGGAGTTCTACAGTCCGACGATCNNNTGAGNNNACTGTTTTTTTTTTTTTTTTTTTTTTTTV  
204 GCCGGTAATACGACTCACTATAGGGAGTTCTACAGTCCGACGATCNNNCAACNNNGAGTTTTTTTTTTTTTTTTTTTTTTTTV  
205 GCCGGTAATACGACTCACTATAGGGAGTTCTACAGTCCGACGATCNNNAGCTNNNCGGATTTTTTTTTTTTTTTTTTTTTTTTTV  
206 GCCGGTAATACGACTCACTATAGGGAGTTCTACAGTCCGACGATCNNNGACANNNGCACTTTTTTTTTTTTTTTTTTTTTTTTTV  
207 GCCGGTAATACGACTCACTATAGGGAGTTCTACAGTCCGACGATCNNNACGANNNCATCTTTTTTTTTTTTTTTTTTTTTTTTTV  
208 GCCGGTAATACGACTCACTATAGGGAGTTCTACAGTCCGACGATCNNNGACTNNNTCGCTTTTTTTTTTTTTTTTTTTTTTTTTV  
209 GCCGGTAATACGACTCACTATAGGGAGTTCTACAGTCCGACGATCNNNTCAGNNNCTCGTTTTTTTTTTTTTTTTTTTTTTTTV  
210 GCCGGTAATACGACTCACTATAGGGAGTTCTACAGTCCGACGATCNNNTGTCNNNACATTTTTTTTTTTTTTTTTTTTTTTTTV  
211 GCCGGTAATACGACTCACTATAGGGAGTTCTACAGTCCGACGATCNNNGAGCNNNTCAGTTTTTTTTTTTTTTTTTTTTTTTTV  
212 GCCGGTAATACGACTCACTATAGGGAGTTCTACAGTCCGACGATCNNNGCCGNNNTATATTTTTTTTTTTTTTTTTTTTTTTTTV  
213 GCCGGTAATACGACTCACTATAGGGAGTTCTACAGTCCGACGATCNNNTGTANNNCATGTTTTTTTTTTTTTTTTTTTTTTTTV  
214 GCCGGTAATACGACTCACTATAGGGAGTTCTACAGTCCGACGATCNNNCTGTNNNTCTGTTTTTTTTTTTTTTTTTTTTTTTTV  
215 GCCGGTAATACGACTCACTATAGGGAGTTCTACAGTCCGACGATCNNNAGGTNNNGAGCTTTTTTTTTTTTTTTTTTTTTTTTTV  
216 GCCGGTAATACGACTCACTATAGGGAGTTCTACAGTCCGACGATCNNNTGCGNNNGACTTTTTTTTTTTTTTTTTTTTTTTTTV  
217 GCCGGTAATACGACTCACTATAGGGAGTTCTACAGTCCGACGATCNNNAGATNNNTGGCTTTTTTTTTTTTTTTTTTTTTTTTTV  
218 GCCGGTAATACGACTCACTATAGGGAGTTCTACAGTCCGACGATCNNNTAGTNNNCTGATTTTTTTTTTTTTTTTTTTTTTTTTV  
219 GCCGGTAATACGACTCACTATAGGGAGTTCTACAGTCCGACGATCNNNACTGNNNACAGTTTTTTTTTTTTTTTTTTTTTTTTV  
220 GCCGGTAATACGACTCACTATAGGGAGTTCTACAGTCCGACGATCNNNTAACNNNGAAGTTTTTTTTTTTTTTTTTTTTTTTTV  
221 GCCGGTAATACGACTCACTATAGGGAGTTCTACAGTCCGACGATCNNNAGAGNNNCGCATTTTTTTTTTTTTTTTTTTTTTTTTV  
222 GCCGGTAATACGACTCACTATAGGGAGTTCTACAGTCCGACGATCNNNACTCNNNCAGTTTTTTTTTTTTTTTTTTTTTTTTV  
223 GCCGGTAATACGACTCACTATAGGGAGTTCTACAGTCCGACGATCNNNGAAGNNNTGTCTTTTTTTTTTTTTTTTTTTTTTTTTV  
224 GCCGGTAATACGACTCACTATAGGGAGTTCTACAGTCCGACGATCNNNAGTCNNNCATATTTTTTTTTTTTTTTTTTTTTTTTTV  
225 GCCGGTAATACGACTCACTATAGGGAGTTCTACAGTCCGACGATCNNNTGAGNNNCTTCTTTTTTTTTTTTTTTTTTTTTTTTTV  
226 GCCGGTAATACGACTCACTATAGGGAGTTCTACAGTCCGACGATCNNNCGTCNNNGATCTTTTTTTTTTTTTTTTTTTTTTTTTV  
227 GCCGGTAATACGACTCACTATAGGGAGTTCTACAGTCCGACGATCNNNTCCANNNTGGATTTTTTTTTTTTTTTTTTTTTTTTTV  
228 GCCGGTAATACGACTCACTATAGGGAGTTCTACAGTCCGACGATCNNNACAGNNNGACGTTTTTTTTTTTTTTTTTTTTTTTTV  
229 GCCGGTAATACGACTCACTATAGGGAGTTCTACAGTCCGACGATCNNNGTCGNNNGTTATTTTTTTTTTTTTTTTTTTTTTTTTV  
230 GCCGGTAATACGACTCACTATAGGGAGTTCTACAGTCCGACGATCNNNACGCNNNCGATTTTTTTTTTTTTTTTTTTTTTTTTV  
231 GCCGGTAATACGACTCACTATAGGGAGTTCTACAGTCCGACGATCNNNATCGNNNCACATTTTTTTTTTTTTTTTTTTTTTTTTV  
232 GCCGGTAATACGACTCACTATAGGGAGTTCTACAGTCCGACGATCNNNCTGCNNNCACATTTTTTTTTTTTTTTTTTTTTTTTTV  
233 GCCGGTAATACGACTCACTATAGGGAGTTCTACAGTCCGACGATCNNNAGGCNNNGACTTTTTTTTTTTTTTTTTTTTTTTTTV  
234 GCCGGTAATACGACTCACTATAGGGAGTTCTACAGTCCGACGATCNNNATCANNNCGCGTTTTTTTTTTTTTTTTTTTTTTTTV  
235 GCCGGTAATACGACTCACTATAGGGAGTTCTACAGTCCGACGATCNNNACCTNNNCTGCTTTTTTTTTTTTTTTTTTTTTTTTTV  
236 GCCGGTAATACGACTCACTATAGGGAGTTCTACAGTCCGACGATCNNNCACTNNNTAGATTTTTTTTTTTTTTTTTTTTTTTTTV  
237 GCCGGTAATACGACTCACTATAGGGAGTTCTACAGTCCGACGATCNNNTGTCNNNCGTTTTTTTTTTTTTTTTTTTTTTTTV  
238 GCCGGTAATACGACTCACTATAGGGAGTTCTACAGTCCGACGATCNNNCAAGNNNTGATTTTTTTTTTTTTTTTTTTTTTTTTV

239 GCCGGTAATACGACTCACTATAGGGAGTTCTACAGTCCGACGATCNNNGTACNNNCACGTTTTTTTTTTTTTTTTTTTTTTTTV  
240 GCCGGTAATACGACTCACTATAGGGAGTTCTACAGTCCGACGATCNNNCGTANNNGTACTTTTTTTTTTTTTTTTTTTTTTTTTV  
241 GCCGGTAATACGACTCACTATAGGGAGTTCTACAGTCCGACGATCNNNCGAGNNNAGTTTTTTTTTTTTTTTTTTTTTTTTV  
242 GCCGGTAATACGACTCACTATAGGGAGTTCTACAGTCCGACGATCNNNCTAGNNNTATGTTTTTTTTTTTTTTTTTTTTTTTTV  
243 GCCGGTAATACGACTCACTATAGGGAGTTCTACAGTCCGACGATCNNNCGGTNNNGTGTTTTTTTTTTTTTTTTTTTTTTTTV  
244 GCCGGTAATACGACTCACTATAGGGAGTTCTACAGTCCGACGATCNNNCTTGNNNATCTTTTTTTTTTTTTTTTTTTTTTTTTV  
245 GCCGGTAATACGACTCACTATAGGGAGTTCTACAGTCCGACGATCNNNCTANNNCTCTTTTTTTTTTTTTTTTTTTTTTTTTV  
246 GCCGGTAATACGACTCACTATAGGGAGTTCTACAGTCCGACGATCNNNATGTNNNGCGTTTTTTTTTTTTTTTTTTTTTTTTV  
247 GCCGGTAATACGACTCACTATAGGGAGTTCTACAGTCCGACGATCNNNACAGNNNAGGCTTTTTTTTTTTTTTTTTTTTTTTTTV  
248 GCCGGTAATACGACTCACTATAGGGAGTTCTACAGTCCGACGATCNNNGTCTNNNGCCATTTTTTTTTTTTTTTTTTTTTTTTTV  
249 GCCGGTAATACGACTCACTATAGGGAGTTCTACAGTCCGACGATCNNNACACNNNCGTCTTTTTTTTTTTTTTTTTTTTTTTTTV  
250 GCCGGTAATACGACTCACTATAGGGAGTTCTACAGTCCGACGATCNNNACATNNNTCAGTTTTTTTTTTTTTTTTTTTTTTTTV  
251 GCCGGTAATACGACTCACTATAGGGAGTTCTACAGTCCGACGATCNNNGCTGNNNCACTTTTTTTTTTTTTTTTTTTTTTTTTV  
252 GCCGGTAATACGACTCACTATAGGGAGTTCTACAGTCCGACGATCNNNCAACNNNGCTCTTTTTTTTTTTTTTTTTTTTTTTTTV  
253 GCCGGTAATACGACTCACTATAGGGAGTTCTACAGTCCGACGATCNNNAGAGNNNGTACTTTTTTTTTTTTTTTTTTTTTTTTTV  
254 GCCGGTAATACGACTCACTATAGGGAGTTCTACAGTCCGACGATCNNNCAATNNNTACGTTTTTTTTTTTTTTTTTTTTTTTTV  
255 GCCGGTAATACGACTCACTATAGGGAGTTCTACAGTCCGACGATCNNNGAACNNNGCCATTTTTTTTTTTTTTTTTTTTTTTTTV  
256 GCCGGTAATACGACTCACTATAGGGAGTTCTACAGTCCGACGATCNNNCTATNNNGTGTTTTTTTTTTTTTTTTTTTTTTTTTV  
257 GCCGGTAATACGACTCACTATAGGGAGTTCTACAGTCCGACGATCNNNCTCTNNNACTCTTTTTTTTTTTTTTTTTTTTTTTTTV  
258 GCCGGTAATACGACTCACTATAGGGAGTTCTACAGTCCGACGATCNNNGATCNNNACTATTTTTTTTTTTTTTTTTTTTTTTTTV  
259 GCCGGTAATACGACTCACTATAGGGAGTTCTACAGTCCGACGATCNNNGTCCANNNTCAGTTTTTTTTTTTTTTTTTTTTTTTTV  
260 GCCGGTAATACGACTCACTATAGGGAGTTCTACAGTCCGACGATCNNNGCTCNNNATCTTTTTTTTTTTTTTTTTTTTTTTTTV  
261 GCCGGTAATACGACTCACTATAGGGAGTTCTACAGTCCGACGATCNNNAGTGNNNGACCTTTTTTTTTTTTTTTTTTTTTTTTTV  
262 GCCGGTAATACGACTCACTATAGGGAGTTCTACAGTCCGACGATCNNNGCATNNNCACCTTTTTTTTTTTTTTTTTTTTTTTTTV  
263 GCCGGTAATACGACTCACTATAGGGAGTTCTACAGTCCGACGATCNNNCTGNNNTACGTTTTTTTTTTTTTTTTTTTTTTTTV  
264 GCCGGTAATACGACTCACTATAGGGAGTTCTACAGTCCGACGATCNNNGATGNNNATCGTTTTTTTTTTTTTTTTTTTTTTTTV  
265 GCCGGTAATACGACTCACTATAGGGAGTTCTACAGTCCGACGATCNNNGACANNNTGAATTTTTTTTTTTTTTTTTTTTTTTTTV  
266 GCCGGTAATACGACTCACTATAGGGAGTTCTACAGTCCGACGATCNNNTCCANNNGTCGTTTTTTTTTTTTTTTTTTTTTTTTV  
267 GCCGGTAATACGACTCACTATAGGGAGTTCTACAGTCCGACGATCNNNCGCANNNTGGTTTTTTTTTTTTTTTTTTTTTTTTV  
268 GCCGGTAATACGACTCACTATAGGGAGTTCTACAGTCCGACGATCNNNTATGNNNGTCTTTTTTTTTTTTTTTTTTTTTTTTTV  
269 GCCGGTAATACGACTCACTATAGGGAGTTCTACAGTCCGACGATCNNNACTCNNNTGGCTTTTTTTTTTTTTTTTTTTTTTTTTV  
270 GCCGGTAATACGACTCACTATAGGGAGTTCTACAGTCCGACGATCNNNGTAGNNNGATTTTTTTTTTTTTTTTTTTTTTTTTV  
271 GCCGGTAATACGACTCACTATAGGGAGTTCTACAGTCCGACGATCNNNACTANNNGCTATTTTTTTTTTTTTTTTTTTTTTTTTV  
272 GCCGGTAATACGACTCACTATAGGGAGTTCTACAGTCCGACGATCNNNAGGANNNTACTTTTTTTTTTTTTTTTTTTTTTTTTV  
273 GCCGGTAATACGACTCACTATAGGGAGTTCTACAGTCCGACGATCNNNTGACNNNCACTTTTTTTTTTTTTTTTTTTTTTTTTV  
274 GCCGGTAATACGACTCACTATAGGGAGTTCTACAGTCCGACGATCNNNGACGNNNACTCTTTTTTTTTTTTTTTTTTTTTTTTTV  
275 GCCGGTAATACGACTCACTATAGGGAGTTCTACAGTCCGACGATCNNNTAGTNNNTGTCTTTTTTTTTTTTTTTTTTTTTTTTV  
276 GCCGGTAATACGACTCACTATAGGGAGTTCTACAGTCCGACGATCNNNAGTGNNNCGGTTTTTTTTTTTTTTTTTTTTTTTTV  
277 GCCGGTAATACGACTCACTATAGGGAGTTCTACAGTCCGACGATCNNNGTGCNNNTCCATTTTTTTTTTTTTTTTTTTTTTTTTV  
278 GCCGGTAATACGACTCACTATAGGGAGTTCTACAGTCCGACGATCNNNGCCTNNNGTACTTTTTTTTTTTTTTTTTTTTTTTTTV  
279 GCCGGTAATACGACTCACTATAGGGAGTTCTACAGTCCGACGATCNNNCTGCNNNCTATTTTTTTTTTTTTTTTTTTTTTTTTV  
280 GCCGGTAATACGACTCACTATAGGGAGTTCTACAGTCCGACGATCNNNCTGNNNGCACTTTTTTTTTTTTTTTTTTTTTTTTTV  
281 GCCGGTAATACGACTCACTATAGGGAGTTCTACAGTCCGACGATCNNNATCTNNNCGTCTTTTTTTTTTTTTTTTTTTTTTTTTV  
282 GCCGGTAATACGACTCACTATAGGGAGTTCTACAGTCCGACGATCNNNGTGANNNGCTCTTTTTTTTTTTTTTTTTTTTTTTTTV  
283 GCCGGTAATACGACTCACTATAGGGAGTTCTACAGTCCGACGATCNNNTGTCNNNGAGATTTTTTTTTTTTTTTTTTTTTTTTTV  
284 GCCGGTAATACGACTCACTATAGGGAGTTCTACAGTCCGACGATCNNNCAGANNNAGGATTTTTTTTTTTTTTTTTTTTTTTTTV  
285 GCCGGTAATACGACTCACTATAGGGAGTTCTACAGTCCGACGATCNNNTGGCNNNGAACTTTTTTTTTTTTTTTTTTTTTTTTTV  
286 GCCGGTAATACGACTCACTATAGGGAGTTCTACAGTCCGACGATCNNNATGCNNNCTCCTTTTTTTTTTTTTTTTTTTTTTTTTV

287 GCCGGTAATACGACTCACTATAGGGAGTTCTACAGTCCGACGATCENNAGGTNNNGCCATTTTTTTTTTTTTTTTTTTTTTTTTV  
288 GCCGGTAATACGACTCACTATAGGGAGTTCTACAGTCCGACGATCENNNGCGCENNNGATATTTTTTTTTTTTTTTTTTTTTTTTTV  
289 GCCGGTAATACGACTCACTATAGGGAGTTCTACAGTCCGACGATCENNACCANNNTCCATTTTTTTTTTTTTTTTTTTTTTTTTV  
290 GCCGGTAATACGACTCACTATAGGGAGTTCTACAGTCCGACGATCENNACGANNNCGGATTTTTTTTTTTTTTTTTTTTTTTTTV  
291 GCCGGTAATACGACTCACTATAGGGAGTTCTACAGTCCGACGATCENNNTGCGNNNGCAATTTTTTTTTTTTTTTTTTTTTTTTTV  
292 GCCGGTAATACGACTCACTATAGGGAGTTCTACAGTCCGACGATCENNATGANNNNGCAATTTTTTTTTTTTTTTTTTTTTTTTTV  
293 GCCGGTAATACGACTCACTATAGGGAGTTCTACAGTCCGACGATCENNNGCTANNNGTGTTTTTTTTTTTTTTTTTTTTTTTTV  
294 GCCGGTAATACGACTCACTATAGGGAGTTCTACAGTCCGACGATCENNCTCTNNNGTCCTTTTTTTTTTTTTTTTTTTTTTTTTV  
295 GCCGGTAATACGACTCACTATAGGGAGTTCTACAGTCCGACGATCENNNTCCTNNNAGAAATTTTTTTTTTTTTTTTTTTTTTTTTV  
296 GCCGGTAATACGACTCACTATAGGGAGTTCTACAGTCCGACGATCENNATGTNNNCGAATTTTTTTTTTTTTTTTTTTTTTTTTV  
297 GCCGGTAATACGACTCACTATAGGGAGTTCTACAGTCCGACGATCENNCTGANNNCGTCTTTTTTTTTTTTTTTTTTTTTTTTTV  
298 GCCGGTAATACGACTCACTATAGGGAGTTCTACAGTCCGACGATCENNACGCNNNTAACTTTTTTTTTTTTTTTTTTTTTTTTTV  
299 GCCGGTAATACGACTCACTATAGGGAGTTCTACAGTCCGACGATCENNACCANNNATACTTTTTTTTTTTTTTTTTTTTTTTTTV  
300 GCCGGTAATACGACTCACTATAGGGAGTTCTACAGTCCGACGATCENNAGGCNNNAGGTTTTTTTTTTTTTTTTTTTTTTTTV  
301 GCCGGTAATACGACTCACTATAGGGAGTTCTACAGTCCGACGATCENNATATNNNCGCTTTTTTTTTTTTTTTTTTTTTTTTTV  
302 GCCGGTAATACGACTCACTATAGGGAGTTCTACAGTCCGACGATCENNNGCTANNNGAAGTTTTTTTTTTTTTTTTTTTTTTTTV  
303 GCCGGTAATACGACTCACTATAGGGAGTTCTACAGTCCGACGATCENNNTGCTNNNGTGCTTTTTTTTTTTTTTTTTTTTTTTTTV  
304 GCCGGTAATACGACTCACTATAGGGAGTTCTACAGTCCGACGATCENNATGANNNACGCTTTTTTTTTTTTTTTTTTTTTTTTTV  
305 GCCGGTAATACGACTCACTATAGGGAGTTCTACAGTCCGACGATCENNATCGNNNAGATTTTTTTTTTTTTTTTTTTTTTTTTV  
306 GCCGGTAATACGACTCACTATAGGGAGTTCTACAGTCCGACGATCENNNTCGANNNTGCGTTTTTTTTTTTTTTTTTTTTTTTTV  
307 GCCGGTAATACGACTCACTATAGGGAGTTCTACAGTCCGACGATCENNNGCTANNNTCGCTTTTTTTTTTTTTTTTTTTTTTTTTV  
308 GCCGGTAATACGACTCACTATAGGGAGTTCTACAGTCCGACGATCENNNGTGTNNNCGGTTTTTTTTTTTTTTTTTTTTTTTTV  
309 GCCGGTAATACGACTCACTATAGGGAGTTCTACAGTCCGACGATCENNAGATNNNACCGTTTTTTTTTTTTTTTTTTTTTTTTV  
310 GCCGGTAATACGACTCACTATAGGGAGTTCTACAGTCCGACGATCENNACCNNNTGAGTTTTTTTTTTTTTTTTTTTTTTTTV  
311 GCCGGTAATACGACTCACTATAGGGAGTTCTACAGTCCGACGATCENNNGAGCNNNATGTTTTTTTTTTTTTTTTTTTTTTTTV  
312 GCCGGTAATACGACTCACTATAGGGAGTTCTACAGTCCGACGATCENNNTCGCNNNCAGATTTTTTTTTTTTTTTTTTTTTTTTTV  
313 GCCGGTAATACGACTCACTATAGGGAGTTCTACAGTCCGACGATCENNNTAGCNNNGTAATTTTTTTTTTTTTTTTTTTTTTTTTV  
314 GCCGGTAATACGACTCACTATAGGGAGTTCTACAGTCCGACGATCENNAGCANNNGCCTTTTTTTTTTTTTTTTTTTTTTTTTV  
315 GCCGGTAATACGACTCACTATAGGGAGTTCTACAGTCCGACGATCENNNGAACNNNTACCTTTTTTTTTTTTTTTTTTTTTTTTTV  
316 GCCGGTAATACGACTCACTATAGGGAGTTCTACAGTCCGACGATCENNNTGACNNNTATGTTTTTTTTTTTTTTTTTTTTTTTTV  
317 GCCGGTAATACGACTCACTATAGGGAGTTCTACAGTCCGACGATCENNATGCNNNTACGTTTTTTTTTTTTTTTTTTTTTTTTV  
318 GCCGGTAATACGACTCACTATAGGGAGTTCTACAGTCCGACGATCENNNTCACNNNGAGCTTTTTTTTTTTTTTTTTTTTTTTTTV  
319 GCCGGTAATACGACTCACTATAGGGAGTTCTACAGTCCGACGATCENNNGTTANNNTGTTTTTTTTTTTTTTTTTTTTTTTTV  
320 GCCGGTAATACGACTCACTATAGGGAGTTCTACAGTCCGACGATCENNNTCCTNNNGATCTTTTTTTTTTTTTTTTTTTTTTTTTV  
321 GCCGGTAATACGACTCACTATAGGGAGTTCTACAGTCCGACGATCENNNTCGTNNNTAAGTTTTTTTTTTTTTTTTTTTTTTTTV  
322 GCCGGTAATACGACTCACTATAGGGAGTTCTACAGTCCGACGATCENNNGTACNNNACTGTTTTTTTTTTTTTTTTTTTTTTTTV  
323 GCCGGTAATACGACTCACTATAGGGAGTTCTACAGTCCGACGATCENNNTACNNNCGGATTTTTTTTTTTTTTTTTTTTTTTTTV  
324 GCCGGTAATACGACTCACTATAGGGAGTTCTACAGTCCGACGATCENNNTGAGNNNTGTATTTTTTTTTTTTTTTTTTTTTTTTTV  
325 GCCGGTAATACGACTCACTATAGGGAGTTCTACAGTCCGACGATCENNNTCTGNNNATTGTTTTTTTTTTTTTTTTTTTTTTTTV  
326 GCCGGTAATACGACTCACTATAGGGAGTTCTACAGTCCGACGATCENNCTCTNNNCTAATTTTTTTTTTTTTTTTTTTTTTTTTV  
327 GCCGGTAATACGACTCACTATAGGGAGTTCTACAGTCCGACGATCENNNGCTCENNNTGTTTTTTTTTTTTTTTTTTTTTTTTV  
328 GCCGGTAATACGACTCACTATAGGGAGTTCTACAGTCCGACGATCENNCTTANNNAGGTTTTTTTTTTTTTTTTTTTTTTTTV  
329 GCCGGTAATACGACTCACTATAGGGAGTTCTACAGTCCGACGATCENNACCNNNGTCTTTTTTTTTTTTTTTTTTTTTTTTTV  
330 GCCGGTAATACGACTCACTATAGGGAGTTCTACAGTCCGACGATCENNNTGTANNNCGGATTTTTTTTTTTTTTTTTTTTTTTTTV  
331 GCCGGTAATACGACTCACTATAGGGAGTTCTACAGTCCGACGATCENNNTACANNNTGCCTTTTTTTTTTTTTTTTTTTTTTTTTV  
332 GCCGGTAATACGACTCACTATAGGGAGTTCTACAGTCCGACGATCENNNGCCTNNNATTATTTTTTTTTTTTTTTTTTTTTTTTTV  
333 GCCGGTAATACGACTCACTATAGGGAGTTCTACAGTCCGACGATCENNNTATTGNNNACGTTTTTTTTTTTTTTTTTTTTTTTTV  
334 GCCGGTAATACGACTCACTATAGGGAGTTCTACAGTCCGACGATCENNNTAGTNNNACGCTTTTTTTTTTTTTTTTTTTTTTTTTV

335 GCCGGTAATACGACTCACTATAGGGAGTTCTACAGTCCGACGATCANNCTACNNNTGCCTTTTTTTTTTTTTTTTTTTTTTTTTV  
336 GCCGGTAATACGACTCACTATAGGGAGTTCTACAGTCCGACGATCANNNGAGANNNCACCTTTTTTTTTTTTTTTTTTTTTTTTTV  
337 GCCGGTAATACGACTCACTATAGGGAGTTCTACAGTCCGACGATCANNNGCCANNNATCTTTTTTTTTTTTTTTTTTTTTTTTTV  
338 GCCGGTAATACGACTCACTATAGGGAGTTCTACAGTCCGACGATCANNNTCGANNNGCTGTTTTTTTTTTTTTTTTTTTTTTTTV  
339 GCCGGTAATACGACTCACTATAGGGAGTTCTACAGTCCGACGATCANNNTGTCNNNAGGCTTTTTTTTTTTTTTTTTTTTTTTTTV  
340 GCCGGTAATACGACTCACTATAGGGAGTTCTACAGTCCGACGATCANNNCACANNNATCTTTTTTTTTTTTTTTTTTTTTTTTTV  
341 GCCGGTAATACGACTCACTATAGGGAGTTCTACAGTCCGACGATCANNNATTCNNNAGGATTTTTTTTTTTTTTTTTTTTTTTTTV  
342 GCCGGTAATACGACTCACTATAGGGAGTTCTACAGTCCGACGATCANNNTGTANNNTCGTTTTTTTTTTTTTTTTTTTTTTTTV  
343 GCCGGTAATACGACTCACTATAGGGAGTTCTACAGTCCGACGATCANNNGTTANNNTCCTTTTTTTTTTTTTTTTTTTTTTTTV  
344 GCCGGTAATACGACTCACTATAGGGAGTTCTACAGTCCGACGATCANNNGTTANNNCGGCTTTTTTTTTTTTTTTTTTTTTTTTTV  
345 GCCGGTAATACGACTCACTATAGGGAGTTCTACAGTCCGACGATCANNNTCTGNNNACCTTTTTTTTTTTTTTTTTTTTTTTTTV  
346 GCCGGTAATACGACTCACTATAGGGAGTTCTACAGTCCGACGATCANNNCAACNNNAGGCTTTTTTTTTTTTTTTTTTTTTTTTTV  
347 GCCGGTAATACGACTCACTATAGGGAGTTCTACAGTCCGACGATCANNNGTCTNNNAGGCTTTTTTTTTTTTTTTTTTTTTTTTTV  
348 GCCGGTAATACGACTCACTATAGGGAGTTCTACAGTCCGACGATCANNNAGTGNNNTCTGTTTTTTTTTTTTTTTTTTTTTTTTV  
349 GCCGGTAATACGACTCACTATAGGGAGTTCTACAGTCCGACGATCANNNTCCTNNNTCATTTTTTTTTTTTTTTTTTTTTTTTTV  
350 GCCGGTAATACGACTCACTATAGGGAGTTCTACAGTCCGACGATCANNNTCACNNNTCCGTTTTTTTTTTTTTTTTTTTTTTTTV  
351 GCCGGTAATACGACTCACTATAGGGAGTTCTACAGTCCGACGATCANNNTATNNNCAACTTTTTTTTTTTTTTTTTTTTTTTTTV  
352 GCCGGTAATACGACTCACTATAGGGAGTTCTACAGTCCGACGATCANNNACCGNNNATGTTTTTTTTTTTTTTTTTTTTTTTTV  
353 GCCGGTAATACGACTCACTATAGGGAGTTCTACAGTCCGACGATCANNNACTCNNNCTTGTTTTTTTTTTTTTTTTTTTTTTTTV  
354 GCCGGTAATACGACTCACTATAGGGAGTTCTACAGTCCGACGATCANNNCGTANNNGCGATTTTTTTTTTTTTTTTTTTTTTTTTV  
355 GCCGGTAATACGACTCACTATAGGGAGTTCTACAGTCCGACGATCANNNTGGANNNTGGCTTTTTTTTTTTTTTTTTTTTTTTTTV  
356 GCCGGTAATACGACTCACTATAGGGAGTTCTACAGTCCGACGATCANNNGCGTNNNGACTTTTTTTTTTTTTTTTTTTTTTTTTV  
357 GCCGGTAATACGACTCACTATAGGGAGTTCTACAGTCCGACGATCANNNCGTGNNNTCACTTTTTTTTTTTTTTTTTTTTTTTTTV  
358 GCCGGTAATACGACTCACTATAGGGAGTTCTACAGTCCGACGATCANNNGATGNNNCTTATTTTTTTTTTTTTTTTTTTTTTTTTV  
359 GCCGGTAATACGACTCACTATAGGGAGTTCTACAGTCCGACGATCANNNGCGANNNTCAATTTTTTTTTTTTTTTTTTTTTTTTTV  
360 GCCGGTAATACGACTCACTATAGGGAGTTCTACAGTCCGACGATCANNNGAGTNNNTCTATTTTTTTTTTTTTTTTTTTTTTTTTV  
361 GCCGGTAATACGACTCACTATAGGGAGTTCTACAGTCCGACGATCANNNCTCGNNNTAATTTTTTTTTTTTTTTTTTTTTTTTTV  
362 GCCGGTAATACGACTCACTATAGGGAGTTCTACAGTCCGACGATCANNNTGGANNNAGTATTTTTTTTTTTTTTTTTTTTTTTTTV  
363 GCCGGTAATACGACTCACTATAGGGAGTTCTACAGTCCGACGATCANNNTCTANNNCACATTTTTTTTTTTTTTTTTTTTTTTTTV  
364 GCCGGTAATACGACTCACTATAGGGAGTTCTACAGTCCGACGATCANNNGATCNNNTAGTTTTTTTTTTTTTTTTTTTTTTTTV  
365 GCCGGTAATACGACTCACTATAGGGAGTTCTACAGTCCGACGATCANNNGAAGNNNGTGATTTTTTTTTTTTTTTTTTTTTTTTTV  
366 GCCGGTAATACGACTCACTATAGGGAGTTCTACAGTCCGACGATCANNNTCACNNNCGCATTTTTTTTTTTTTTTTTTTTTTTTTV  
367 GCCGGTAATACGACTCACTATAGGGAGTTCTACAGTCCGACGATCANNNCGATNNNCGGTTTTTTTTTTTTTTTTTTTTTTTTV  
368 GCCGGTAATACGACTCACTATAGGGAGTTCTACAGTCCGACGATCANNNTGCANNNATCCTTTTTTTTTTTTTTTTTTTTTTTTTV  
369 GCCGGTAATACGACTCACTATAGGGAGTTCTACAGTCCGACGATCANNNCTTGNNNCGAATTTTTTTTTTTTTTTTTTTTTTTTTV  
370 GCCGGTAATACGACTCACTATAGGGAGTTCTACAGTCCGACGATCANNNAGCTNNNGATTTTTTTTTTTTTTTTTTTTTTTTTV  
371 GCCGGTAATACGACTCACTATAGGGAGTTCTACAGTCCGACGATCANNNATTGNNNTGCTTTTTTTTTTTTTTTTTTTTTTTTTV  
372 GCCGGTAATACGACTCACTATAGGGAGTTCTACAGTCCGACGATCANNNACGCNNNTGTATTTTTTTTTTTTTTTTTTTTTTTTTV  
373 GCCGGTAATACGACTCACTATAGGGAGTTCTACAGTCCGACGATCANNNTGACNNNTGGTTTTTTTTTTTTTTTTTTTTTTTTV  
374 GCCGGTAATACGACTCACTATAGGGAGTTCTACAGTCCGACGATCANNNCATCNNNCGATTTTTTTTTTTTTTTTTTTTTTTTTV  
375 GCCGGTAATACGACTCACTATAGGGAGTTCTACAGTCCGACGATCANNNTATANNNAGCGTTTTTTTTTTTTTTTTTTTTTTTTV  
376 GCCGGTAATACGACTCACTATAGGGAGTTCTACAGTCCGACGATCANNNTCGTNNNTGGTTTTTTTTTTTTTTTTTTTTTTTTV  
377 GCCGGTAATACGACTCACTATAGGGAGTTCTACAGTCCGACGATCANNNCTCANNNAGTGTTTTTTTTTTTTTTTTTTTTTTTTV  
378 GCCGGTAATACGACTCACTATAGGGAGTTCTACAGTCCGACGATCANNNGAGTNNNTGATTTTTTTTTTTTTTTTTTTTTTTTTV  
379 GCCGGTAATACGACTCACTATAGGGAGTTCTACAGTCCGACGATCANNNTGGANNNCGCTTTTTTTTTTTTTTTTTTTTTTTTTV  
380 GCCGGTAATACGACTCACTATAGGGAGTTCTACAGTCCGACGATCANNNTCGTNNNTCCATTTTTTTTTTTTTTTTTTTTTTTTTV  
381 GCCGGTAATACGACTCACTATAGGGAGTTCTACAGTCCGACGATCANNNATGCNNNTCATTTTTTTTTTTTTTTTTTTTTTTTTV  
382 GCCGGTAATACGACTCACTATAGGGAGTTCTACAGTCCGACGATCANNNTGGTNNNATTGTTTTTTTTTTTTTTTTTTTTTTTTV

383 GCCGGTAATACGACTCACTATAGGGAGTTCTACAGTCCGACGATCNNNCAGANNNGCGTTTTTTTTTTTTTTTTTTTTTTTTTTTTV

384 GCCGGTAATACGACTCACTATAGGGAGTTCTACAGTCCGACGATCNNNCATGNNNACAATTTTTTTTTTTTTTTTTTTTTTTTTTTTV

## Supplementary Table 2

### Top Sequence

1 GGTGATCCGGTAATACGACTCACTATAGGGGTTTCAGAGTTCTACAGTCCGACGATCENNNTGCANNNTATGGA  
2 GGTGATCCGGTAATACGACTCACTATAGGGGTTTCAGAGTTCTACAGTCCGACGATCENNNGTGCNNNTGAAGA  
3 GGTGATCCGGTAATACGACTCACTATAGGGGTTTCAGAGTTCTACAGTCCGACGATCENNNGCTGNNTTCTCGA  
4 GGTGATCCGGTAATACGACTCACTATAGGGGTTTCAGAGTTCTACAGTCCGACGATCENNNGTAGNNNTATCGGA  
5 GGTGATCCGGTAATACGACTCACTATAGGGGTTTCAGAGTTCTACAGTCCGACGATCENNNTCTNNGACTGA  
6 GGTGATCCGGTAATACGACTCACTATAGGGGTTTCAGAGTTCTACAGTCCGACGATCENNNGTGNNNAGCCGA  
7 GGTGATCCGGTAATACGACTCACTATAGGGGTTTCAGAGTTCTACAGTCCGACGATCENNNGCACNNNTATCGA  
8 GGTGATCCGGTAATACGACTCACTATAGGGGTTTCAGAGTTCTACAGTCCGACGATCENNNGAATNNGACTGA  
9 GGTGATCCGGTAATACGACTCACTATAGGGGTTTCAGAGTTCTACAGTCCGACGATCENNNGCTANNNGCCAGA  
10 GGTGATCCGGTAATACGACTCACTATAGGGGTTTCAGAGTTCTACAGTCCGACGATCENNNTGAGNNNTAAGA  
11 GGTGATCCGGTAATACGACTCACTATAGGGGTTTCAGAGTTCTACAGTCCGACGATCENNNTGCGNNNTCAGGA  
12 GGTGATCCGGTAATACGACTCACTATAGGGGTTTCAGAGTTCTACAGTCCGACGATCENNNGCANNNGTAGGA  
13 GGTGATCCGGTAATACGACTCACTATAGGGGTTTCAGAGTTCTACAGTCCGACGATCENNNTACNNNACGTGA  
14 GGTGATCCGGTAATACGACTCACTATAGGGGTTTCAGAGTTCTACAGTCCGACGATCENNNGTANNNGTCTGA  
15 GGTGATCCGGTAATACGACTCACTATAGGGGTTTCAGAGTTCTACAGTCCGACGATCENNNTAGANNNGATGGA  
16 GGTGATCCGGTAATACGACTCACTATAGGGGTTTCAGAGTTCTACAGTCCGACGATCENNNTCGANNNCATGA  
17 GGTGATCCGGTAATACGACTCACTATAGGGGTTTCAGAGTTCTACAGTCCGACGATCENNNTAGANNNTGGAGA  
18 GGTGATCCGGTAATACGACTCACTATAGGGGTTTCAGAGTTCTACAGTCCGACGATCENNNTCTANNNGACGA  
19 GGTGATCCGGTAATACGACTCACTATAGGGGTTTCAGAGTTCTACAGTCCGACGATCENNNTATGNNNGACGA  
20 GGTGATCCGGTAATACGACTCACTATAGGGGTTTCAGAGTTCTACAGTCCGACGATCENNNGCGTNNNTATCGA  
21 GGTGATCCGGTAATACGACTCACTATAGGGGTTTCAGAGTTCTACAGTCCGACGATCENNNTCANNNGAAGGA  
22 GGTGATCCGGTAATACGACTCACTATAGGGGTTTCAGAGTTCTACAGTCCGACGATCENNNTAGTANNNGCGTGA  
23 GGTGATCCGGTAATACGACTCACTATAGGGGTTTCAGAGTTCTACAGTCCGACGATCENNNTGANNNACTTGA  
24 GGTGATCCGGTAATACGACTCACTATAGGGGTTTCAGAGTTCTACAGTCCGACGATCENNNTCTANNNGTAGGA  
25 GGTGATCCGGTAATACGACTCACTATAGGGGTTTCAGAGTTCTACAGTCCGACGATCENNNGTANNNTGATGA  
26 GGTGATCCGGTAATACGACTCACTATAGGGGTTTCAGAGTTCTACAGTCCGACGATCENNNTGGTNNNCGGTGA  
27 GGTGATCCGGTAATACGACTCACTATAGGGGTTTCAGAGTTCTACAGTCCGACGATCENNNTAGANNNGATGA  
28 GGTGATCCGGTAATACGACTCACTATAGGGGTTTCAGAGTTCTACAGTCCGACGATCENNNTCAGTNNNGAGAGA  
29 GGTGATCCGGTAATACGACTCACTATAGGGGTTTCAGAGTTCTACAGTCCGACGATCENNNTACGNNNCAATGA  
30 GGTGATCCGGTAATACGACTCACTATAGGGGTTTCAGAGTTCTACAGTCCGACGATCENNNTCGCNNNTGTGA  
31 GGTGATCCGGTAATACGACTCACTATAGGGGTTTCAGAGTTCTACAGTCCGACGATCENNNTCTANNNACGAGA  
32 GGTGATCCGGTAATACGACTCACTATAGGGGTTTCAGAGTTCTACAGTCCGACGATCENNNTCGNNNGCAAGA  
33 GGTGATCCGGTAATACGACTCACTATAGGGGTTTCAGAGTTCTACAGTCCGACGATCENNNTAGGCNNNGTATGA  
34 GGTGATCCGGTAATACGACTCACTATAGGGGTTTCAGAGTTCTACAGTCCGACGATCENNNTAAGNNNCATCGA  
35 GGTGATCCGGTAATACGACTCACTATAGGGGTTTCAGAGTTCTACAGTCCGACGATCENNNGCTGNNNGATAGA  
36 GGTGATCCGGTAATACGACTCACTATAGGGGTTTCAGAGTTCTACAGTCCGACGATCENNNGTANNNTAGTGA  
37 GGTGATCCGGTAATACGACTCACTATAGGGGTTTCAGAGTTCTACAGTCCGACGATCENNNTCANNNGTAAAGA  
38 GGTGATCCGGTAATACGACTCACTATAGGGGTTTCAGAGTTCTACAGTCCGACGATCENNNGCTANNNTGAGA  
39 GGTGATCCGGTAATACGACTCACTATAGGGGTTTCAGAGTTCTACAGTCCGACGATCENNNGAACNNNTGTAGA  
40 GGTGATCCGGTAATACGACTCACTATAGGGGTTTCAGAGTTCTACAGTCCGACGATCENNNTACCANNNTCAGA  
41 GGTGATCCGGTAATACGACTCACTATAGGGGTTTCAGAGTTCTACAGTCCGACGATCENNNTGANNNCGACGA  
42 GGTGATCCGGTAATACGACTCACTATAGGGGTTTCAGAGTTCTACAGTCCGACGATCENNNGTACNNNTAGTGA  
43 GGTGATCCGGTAATACGACTCACTATAGGGGTTTCAGAGTTCTACAGTCCGACGATCENNNTCAGTNNNGTCGA  
44 GGTGATCCGGTAATACGACTCACTATAGGGGTTTCAGAGTTCTACAGTCCGACGATCENNNGAATNNTCGTGA  
45 GGTGATCCGGTAATACGACTCACTATAGGGGTTTCAGAGTTCTACAGTCCGACGATCENNNTCANNNACTCGA  
46 GGTGATCCGGTAATACGACTCACTATAGGGGTTTCAGAGTTCTACAGTCCGACGATCENNNTGTNNNGTATGA  
47 GGTGATCCGGTAATACGACTCACTATAGGGGTTTCAGAGTTCTACAGTCCGACGATCENNNTGTNNNAGCCGA  
48 GGTGATCCGGTAATACGACTCACTATAGGGGTTTCAGAGTTCTACAGTCCGACGATCENNNTCAANNNGTCGA  
49 GGTGATCCGGTAATACGACTCACTATAGGGGTTTCAGAGTTCTACAGTCCGACGATCENNNGAGCNNNTCTCGA  
50 GGTGATCCGGTAATACGACTCACTATAGGGGTTTCAGAGTTCTACAGTCCGACGATCENNNTGTCNNNTCTGGA  
51 GGTGATCCGGTAATACGACTCACTATAGGGGTTTCAGAGTTCTACAGTCCGACGATCENNNGATGNNTTCCGGA  
52 GGTGATCCGGTAATACGACTCACTATAGGGGTTTCAGAGTTCTACAGTCCGACGATCENNNGTTCNNNGACCGA  
53 GGTGATCCGGTAATACGACTCACTATAGGGGTTTCAGAGTTCTACAGTCCGACGATCENNNTACNNNTGTGA  
54 GGTGATCCGGTAATACGACTCACTATAGGGGTTTCAGAGTTCTACAGTCCGACGATCENNNGACGNNNTCTGA  
55 GGTGATCCGGTAATACGACTCACTATAGGGGTTTCAGAGTTCTACAGTCCGACGATCENNNGATCENNNGCTGGA  
56 GGTGATCCGGTAATACGACTCACTATAGGGGTTTCAGAGTTCTACAGTCCGACGATCENNNTGANNNTGGCGA  
57 GGTGATCCGGTAATACGACTCACTATAGGGGTTTCAGAGTTCTACAGTCCGACGATCENNNGAACNNNAGCTGA  
58 GGTGATCCGGTAATACGACTCACTATAGGGGTTTCAGAGTTCTACAGTCCGACGATCENNNTGTNNNTCAAGA  
59 GGTGATCCGGTAATACGACTCACTATAGGGGTTTCAGAGTTCTACAGTCCGACGATCENNNGTANNNTGCAGA  
60 GGTGATCCGGTAATACGACTCACTATAGGGGTTTCAGAGTTCTACAGTCCGACGATCENNNGATCENNNGAGAGA  
61 GGTGATCCGGTAATACGACTCACTATAGGGGTTTCAGAGTTCTACAGTCCGACGATCENNNTGCANNNATTGGA  
62 GGTGATCCGGTAATACGACTCACTATAGGGGTTTCAGAGTTCTACAGTCCGACGATCENNNTCTNNNAGCCGA  
63 GGTGATCCGGTAATACGACTCACTATAGGGGTTTCAGAGTTCTACAGTCCGACGATCENNNGTCTNNNTCCGGA  
64 GGTGATCCGGTAATACGACTCACTATAGGGGTTTCAGAGTTCTACAGTCCGACGATCENNNTAGANNNAGCAGA  
65 GGTGATCCGGTAATACGACTCACTATAGGGGTTTCAGAGTTCTACAGTCCGACGATCENNNTGTCNNNGTCCGA  
66 GGTGATCCGGTAATACGACTCACTATAGGGGTTTCAGAGTTCTACAGTCCGACGATCENNNGACGNNNGAAGGA  
67 GGTGATCCGGTAATACGACTCACTATAGGGGTTTCAGAGTTCTACAGTCCGACGATCENNNTGGCANNNTCTGA  
68 GGTGATCCGGTAATACGACTCACTATAGGGGTTTCAGAGTTCTACAGTCCGACGATCENNNTACANNNTGGTGA  
69 GGTGATCCGGTAATACGACTCACTATAGGGGTTTCAGAGTTCTACAGTCCGACGATCENNNTATTGNNNCGCGGA

70 GGTGATCCGGTAATACGACTCACTATAGGGGTTTCAGAGTTCTACAGTCCGACGATCNNNGAGCNNNTGGTGA  
71 GGTGATCCGGTAATACGACTCACTATAGGGGTTTCAGAGTTCTACAGTCCGACGATCNNNCTCGNNNAGAGGA  
72 GGTGATCCGGTAATACGACTCACTATAGGGGTTTCAGAGTTCTACAGTCCGACGATCNNNGTTCNNNTGGCGA  
73 GGTGATCCGGTAATACGACTCACTATAGGGGTTTCAGAGTTCTACAGTCCGACGATCNNNCGGTNNNGCTTGA  
74 GGTGATCCGGTAATACGACTCACTATAGGGGTTTCAGAGTTCTACAGTCCGACGATCNNNGCAGNNNGTAGGA  
75 GGTGATCCGGTAATACGACTCACTATAGGGGTTTCAGAGTTCTACAGTCCGACGATCNNNGCACNNNAGAGGA  
76 GGTGATCCGGTAATACGACTCACTATAGGGGTTTCAGAGTTCTACAGTCCGACGATCNNNTCTNNNTACCGA  
77 GGTGATCCGGTAATACGACTCACTATAGGGGTTTCAGAGTTCTACAGTCCGACGATCNNNCTCANNNGATCGA  
78 GGTGATCCGGTAATACGACTCACTATAGGGGTTTCAGAGTTCTACAGTCCGACGATCNNNACAGNNNACACGA  
79 GGTGATCCGGTAATACGACTCACTATAGGGGTTTCAGAGTTCTACAGTCCGACGATCNNNCTCGNNNTCTGGA  
80 GGTGATCCGGTAATACGACTCACTATAGGGGTTTCAGAGTTCTACAGTCCGACGATCNNNAGTCNNNACCTGA  
81 GGTGATCCGGTAATACGACTCACTATAGGGGTTTCAGAGTTCTACAGTCCGACGATCNNNATGCNNNAGTAGA  
82 GGTGATCCGGTAATACGACTCACTATAGGGGTTTCAGAGTTCTACAGTCCGACGATCNNNACTGNNNCTAGGA  
83 GGTGATCCGGTAATACGACTCACTATAGGGGTTTCAGAGTTCTACAGTCCGACGATCNNNGTCTNNNACTAGA  
84 GGTGATCCGGTAATACGACTCACTATAGGGGTTTCAGAGTTCTACAGTCCGACGATCNNNCGAGNNNGATGGA  
85 GGTGATCCGGTAATACGACTCACTATAGGGGTTTCAGAGTTCTACAGTCCGACGATCNNNGTGCNNNACAGAGA  
86 GGTGATCCGGTAATACGACTCACTATAGGGGTTTCAGAGTTCTACAGTCCGACGATCNNNGACTNNNGATAGA  
87 GGTGATCCGGTAATACGACTCACTATAGGGGTTTCAGAGTTCTACAGTCCGACGATCNNNTGGCNNNCGTAGA  
88 GGTGATCCGGTAATACGACTCACTATAGGGGTTTCAGAGTTCTACAGTCCGACGATCNNNCTGNNNCTAGGA  
89 GGTGATCCGGTAATACGACTCACTATAGGGGTTTCAGAGTTCTACAGTCCGACGATCNNNGCACNNNCTAAGA  
90 GGTGATCCGGTAATACGACTCACTATAGGGGTTTCAGAGTTCTACAGTCCGACGATCNNNATTANNNGCTGGA  
91 GGTGATCCGGTAATACGACTCACTATAGGGGTTTCAGAGTTCTACAGTCCGACGATCNNNCAAGNNNATCTGA  
92 GGTGATCCGGTAATACGACTCACTATAGGGGTTTCAGAGTTCTACAGTCCGACGATCNNNCGCANNNCTAAGA  
93 GGTGATCCGGTAATACGACTCACTATAGGGGTTTCAGAGTTCTACAGTCCGACGATCNNNGTGGNNNCGATGA  
94 GGTGATCCGGTAATACGACTCACTATAGGGGTTTCAGAGTTCTACAGTCCGACGATCNNNAGCNNNCTAGGA  
95 GGTGATCCGGTAATACGACTCACTATAGGGGTTTCAGAGTTCTACAGTCCGACGATCNNNTCTGNNNTGAGGA  
96 GGTGATCCGGTAATACGACTCACTATAGGGGTTTCAGAGTTCTACAGTCCGACGATCNNNACTANNNGAGAGA  
97 GGTGATCCGGTAATACGACTCACTATAGGGGTTTCAGAGTTCTACAGTCCGACGATCNNNAGACNNNGCGAGA  
98 GGTGATCCGGTAATACGACTCACTATAGGGGTTTCAGAGTTCTACAGTCCGACGATCNNNACCANNNGTAGGA  
99 GGTGATCCGGTAATACGACTCACTATAGGGGTTTCAGAGTTCTACAGTCCGACGATCNNNTAATNNNCGGGA  
100 GGTGATCCGGTAATACGACTCACTATAGGGGTTTCAGAGTTCTACAGTCCGACGATCNNNNGTGANNNCTCGGA  
101 GGTGATCCGGTAATACGACTCACTATAGGGGTTTCAGAGTTCTACAGTCCGACGATCNNNATCTNNNCTACGA  
102 GGTGATCCGGTAATACGACTCACTATAGGGGTTTCAGAGTTCTACAGTCCGACGATCNNNAGGANNNCTTGA  
103 GGTGATCCGGTAATACGACTCACTATAGGGGTTTCAGAGTTCTACAGTCCGACGATCNNNATTGNNNCTAGGA  
104 GGTGATCCGGTAATACGACTCACTATAGGGGTTTCAGAGTTCTACAGTCCGACGATCNNNTCGTNNNGTGGGA  
105 GGTGATCCGGTAATACGACTCACTATAGGGGTTTCAGAGTTCTACAGTCCGACGATCNNNACTNNNGCACGA  
106 GGTGATCCGGTAATACGACTCACTATAGGGGTTTCAGAGTTCTACAGTCCGACGATCNNNCTANNNGTGGGA  
107 GGTGATCCGGTAATACGACTCACTATAGGGGTTTCAGAGTTCTACAGTCCGACGATCNNNAGACNNNCTCTGA  
108 GGTGATCCGGTAATACGACTCACTATAGGGGTTTCAGAGTTCTACAGTCCGACGATCNNNCGTANNNGATTGA  
109 GGTGATCCGGTAATACGACTCACTATAGGGGTTTCAGAGTTCTACAGTCCGACGATCNNNACGANNNATGAGA  
110 GGTGATCCGGTAATACGACTCACTATAGGGGTTTCAGAGTTCTACAGTCCGACGATCNNNTGACNNNCTCTGA  
111 GGTGATCCGGTAATACGACTCACTATAGGGGTTTCAGAGTTCTACAGTCCGACGATCNNNCTAGNNNGTTCGA  
112 GGTGATCCGGTAATACGACTCACTATAGGGGTTTCAGAGTTCTACAGTCCGACGATCNNNNGTGANNNCTCGGA  
113 GGTGATCCGGTAATACGACTCACTATAGGGGTTTCAGAGTTCTACAGTCCGACGATCNNNAGGCNNNNTGTCGA  
114 GGTGATCCGGTAATACGACTCACTATAGGGGTTTCAGAGTTCTACAGTCCGACGATCNNNCGCTNNNGAAGGA  
115 GGTGATCCGGTAATACGACTCACTATAGGGGTTTCAGAGTTCTACAGTCCGACGATCNNNACGANNNGCTTGA  
116 GGTGATCCGGTAATACGACTCACTATAGGGGTTTCAGAGTTCTACAGTCCGACGATCNNNATCTNNNAGCAGA  
117 GGTGATCCGGTAATACGACTCACTATAGGGGTTTCAGAGTTCTACAGTCCGACGATCNNNNGCATNNNCTCTGA  
118 GGTGATCCGGTAATACGACTCACTATAGGGGTTTCAGAGTTCTACAGTCCGACGATCNNNCAACNNNATGGA  
119 GGTGATCCGGTAATACGACTCACTATAGGGGTTTCAGAGTTCTACAGTCCGACGATCNNNACGTNNNCTGGA  
120 GGTGATCCGGTAATACGACTCACTATAGGGGTTTCAGAGTTCTACAGTCCGACGATCNNNGATGNNNCGTCGA  
121 GGTGATCCGGTAATACGACTCACTATAGGGGTTTCAGAGTTCTACAGTCCGACGATCNNNGTGANNNCTTAGA  
122 GGTGATCCGGTAATACGACTCACTATAGGGGTTTCAGAGTTCTACAGTCCGACGATCNNNTCGTNNNAGGAGA  
123 GGTGATCCGGTAATACGACTCACTATAGGGGTTTCAGAGTTCTACAGTCCGACGATCNNNGTGCNNNAGTAGGA  
124 GGTGATCCGGTAATACGACTCACTATAGGGGTTTCAGAGTTCTACAGTCCGACGATCNNNNGTGANNNCTCGA  
125 GGTGATCCGGTAATACGACTCACTATAGGGGTTTCAGAGTTCTACAGTCCGACGATCNNNCATGNNNNTGCCGA  
126 GGTGATCCGGTAATACGACTCACTATAGGGGTTTCAGAGTTCTACAGTCCGACGATCNNNAGCANNNACTAGA  
127 GGTGATCCGGTAATACGACTCACTATAGGGGTTTCAGAGTTCTACAGTCCGACGATCNNNCGTANNNTGTGGA  
128 GGTGATCCGGTAATACGACTCACTATAGGGGTTTCAGAGTTCTACAGTCCGACGATCNNNCTGNNNGCTAGA  
129 GGTGATCCGGTAATACGACTCACTATAGGGGTTTCAGAGTTCTACAGTCCGACGATCNNNNGTCTNNNGTAAGA  
130 GGTGATCCGGTAATACGACTCACTATAGGGGTTTCAGAGTTCTACAGTCCGACGATCNNNTCGCANNNAGTGGGA  
131 GGTGATCCGGTAATACGACTCACTATAGGGGTTTCAGAGTTCTACAGTCCGACGATCNNNTGTGNNNTACAGA  
132 GGTGATCCGGTAATACGACTCACTATAGGGGTTTCAGAGTTCTACAGTCCGACGATCNNNCTGNNNGTCCGA  
133 GGTGATCCGGTAATACGACTCACTATAGGGGTTTCAGAGTTCTACAGTCCGACGATCNNNCTCANNNAGCCGA  
134 GGTGATCCGGTAATACGACTCACTATAGGGGTTTCAGAGTTCTACAGTCCGACGATCNNNATCTNNNTGTGGA  
135 GGTGATCCGGTAATACGACTCACTATAGGGGTTTCAGAGTTCTACAGTCCGACGATCNNNTACANNNGTCCGA  
136 GGTGATCCGGTAATACGACTCACTATAGGGGTTTCAGAGTTCTACAGTCCGACGATCNNNNGTAGNNNGACCGA  
137 GGTGATCCGGTAATACGACTCACTATAGGGGTTTCAGAGTTCTACAGTCCGACGATCNNNCACGNNNCTTCGA  
138 GGTGATCCGGTAATACGACTCACTATAGGGGTTTCAGAGTTCTACAGTCCGACGATCNNNGTCANNNATTCGA  
139 GGTGATCCGGTAATACGACTCACTATAGGGGTTTCAGAGTTCTACAGTCCGACGATCNNNAGCGNNNGACAGA  
140 GGTGATCCGGTAATACGACTCACTATAGGGGTTTCAGAGTTCTACAGTCCGACGATCNNNGTGGNNNCGGTGA  
141 GGTGATCCGGTAATACGACTCACTATAGGGGTTTCAGAGTTCTACAGTCCGACGATCNNNCTATNNNCGATGA  
142 GGTGATCCGGTAATACGACTCACTATAGGGGTTTCAGAGTTCTACAGTCCGACGATCNNNCGATNNNAGCCGA

143 GGTGATCCGGTAATACGACTCACTATAGGGGTTTCAGAGTTCTACAGTCCGACGATCENNNTGTGNNNCAGTGA  
144 GGTGATCCGGTAATACGACTCACTATAGGGGTTTCAGAGTTCTACAGTCCGACGATCENNNTATNNTTAGCGA  
145 GGTGATCCGGTAATACGACTCACTATAGGGGTTTCAGAGTTCTACAGTCCGACGATCENNNTAGACNNNATTGGA  
146 GGTGATCCGGTAATACGACTCACTATAGGGGTTTCAGAGTTCTACAGTCCGACGATCENNNTGACNNNGCTCGA  
147 GGTGATCCGGTAATACGACTCACTATAGGGGTTTCAGAGTTCTACAGTCCGACGATCENNNTAGCNNNGTCTGA  
148 GGTGATCCGGTAATACGACTCACTATAGGGGTTTCAGAGTTCTACAGTCCGACGATCENNNTACNNNAGGTGA  
149 GGTGATCCGGTAATACGACTCACTATAGGGGTTTCAGAGTTCTACAGTCCGACGATCENNNTAGCANNNTACAGA  
150 GGTGATCCGGTAATACGACTCACTATAGGGGTTTCAGAGTTCTACAGTCCGACGATCENNNTGACNNNGTCTGA  
151 GGTGATCCGGTAATACGACTCACTATAGGGGTTTCAGAGTTCTACAGTCCGACGATCENNNTGCANNNAGAGGA  
152 GGTGATCCGGTAATACGACTCACTATAGGGGTTTCAGAGTTCTACAGTCCGACGATCENNNTGAGANNNGTGAGA  
153 GGTGATCCGGTAATACGACTCACTATAGGGGTTTCAGAGTTCTACAGTCCGACGATCENNNTCAGNNNACCGGA  
154 GGTGATCCGGTAATACGACTCACTATAGGGGTTTCAGAGTTCTACAGTCCGACGATCENNNTCAGNNNTAGAGA  
155 GGTGATCCGGTAATACGACTCACTATAGGGGTTTCAGAGTTCTACAGTCCGACGATCENNNTGACNNNCGAGGA  
156 GGTGATCCGGTAATACGACTCACTATAGGGGTTTCAGAGTTCTACAGTCCGACGATCENNNTGCANNNCTGTGA  
157 GGTGATCCGGTAATACGACTCACTATAGGGGTTTCAGAGTTCTACAGTCCGACGATCENNNTGACNNNCGTTGA  
158 GGTGATCCGGTAATACGACTCACTATAGGGGTTTCAGAGTTCTACAGTCCGACGATCENNNTGCTANNNGTACGA  
159 GGTGATCCGGTAATACGACTCACTATAGGGGTTTCAGAGTTCTACAGTCCGACGATCENNNTACGNNNGTGTGA  
160 GGTGATCCGGTAATACGACTCACTATAGGGGTTTCAGAGTTCTACAGTCCGACGATCENNNTCAGNNNCAACGA  
161 GGTGATCCGGTAATACGACTCACTATAGGGGTTTCAGAGTTCTACAGTCCGACGATCENNNTGCTGNNNACAGA  
162 GGTGATCCGGTAATACGACTCACTATAGGGGTTTCAGAGTTCTACAGTCCGACGATCENNNTAGANNNTAACGA  
163 GGTGATCCGGTAATACGACTCACTATAGGGGTTTCAGAGTTCTACAGTCCGACGATCENNNTGAGANNNTGCCGA  
164 GGTGATCCGGTAATACGACTCACTATAGGGGTTTCAGAGTTCTACAGTCCGACGATCENNNTCTANNNCGTGA  
165 GGTGATCCGGTAATACGACTCACTATAGGGGTTTCAGAGTTCTACAGTCCGACGATCENNNTGAGNNNGTGTGA  
166 GGTGATCCGGTAATACGACTCACTATAGGGGTTTCAGAGTTCTACAGTCCGACGATCENNNTGTTANNNGCGCGA  
167 GGTGATCCGGTAATACGACTCACTATAGGGGTTTCAGAGTTCTACAGTCCGACGATCENNNTCAGANNNTAAGA  
168 GGTGATCCGGTAATACGACTCACTATAGGGGTTTCAGAGTTCTACAGTCCGACGATCENNNTGCTNNNCGCTGA  
169 GGTGATCCGGTAATACGACTCACTATAGGGGTTTCAGAGTTCTACAGTCCGACGATCENNNTAGTANNNGTTCGA  
170 GGTGATCCGGTAATACGACTCACTATAGGGGTTTCAGAGTTCTACAGTCCGACGATCENNNTATCENNNTCCAGA  
171 GGTGATCCGGTAATACGACTCACTATAGGGGTTTCAGAGTTCTACAGTCCGACGATCENNNTAGTCNNNGATGGA  
172 GGTGATCCGGTAATACGACTCACTATAGGGGTTTCAGAGTTCTACAGTCCGACGATCENNNTACCANNNACGTGA  
173 GGTGATCCGGTAATACGACTCACTATAGGGGTTTCAGAGTTCTACAGTCCGACGATCENNNTCAGANNNTACGA  
174 GGTGATCCGGTAATACGACTCACTATAGGGGTTTCAGAGTTCTACAGTCCGACGATCENNNTCTNNNTGACGA  
175 GGTGATCCGGTAATACGACTCACTATAGGGGTTTCAGAGTTCTACAGTCCGACGATCENNNTACCTNNNTCAAGA  
176 GGTGATCCGGTAATACGACTCACTATAGGGGTTTCAGAGTTCTACAGTCCGACGATCENNNTGAGANNNTACAGA  
177 GGTGATCCGGTAATACGACTCACTATAGGGGTTTCAGAGTTCTACAGTCCGACGATCENNNTGGTNNNCTTCGA  
178 GGTGATCCGGTAATACGACTCACTATAGGGGTTTCAGAGTTCTACAGTCCGACGATCENNNTACCANNNTATCGA  
179 GGTGATCCGGTAATACGACTCACTATAGGGGTTTCAGAGTTCTACAGTCCGACGATCENNNTACTNNNCGTGA  
180 GGTGATCCGGTAATACGACTCACTATAGGGGTTTCAGAGTTCTACAGTCCGACGATCENNNTCGGTNNNCTAGGA  
181 GGTGATCCGGTAATACGACTCACTATAGGGGTTTCAGAGTTCTACAGTCCGACGATCENNNTGTTANNNCATCGA  
182 GGTGATCCGGTAATACGACTCACTATAGGGGTTTCAGAGTTCTACAGTCCGACGATCENNNTACACNNNTACTGA  
183 GGTGATCCGGTAATACGACTCACTATAGGGGTTTCAGAGTTCTACAGTCCGACGATCENNNTCATGNNNCGAGGA  
184 GGTGATCCGGTAATACGACTCACTATAGGGGTTTCAGAGTTCTACAGTCCGACGATCENNNTCGCGNNNTGTGA  
185 GGTGATCCGGTAATACGACTCACTATAGGGGTTTCAGAGTTCTACAGTCCGACGATCENNNTAGANNNAGTGA  
186 GGTGATCCGGTAATACGACTCACTATAGGGGTTTCAGAGTTCTACAGTCCGACGATCENNNTGTTANNNACAGGA  
187 GGTGATCCGGTAATACGACTCACTATAGGGGTTTCAGAGTTCTACAGTCCGACGATCENNNTGCTNNNGCAAGA  
188 GGTGATCCGGTAATACGACTCACTATAGGGGTTTCAGAGTTCTACAGTCCGACGATCENNNTATGCNNNCTAAGA  
189 GGTGATCCGGTAATACGACTCACTATAGGGGTTTCAGAGTTCTACAGTCCGACGATCENNNTATNNTGAGGA  
190 GGTGATCCGGTAATACGACTCACTATAGGGGTTTCAGAGTTCTACAGTCCGACGATCENNNTATCENNNTAGGA  
191 GGTGATCCGGTAATACGACTCACTATAGGGGTTTCAGAGTTCTACAGTCCGACGATCENNNTGTNNNCGAAGA  
192 GGTGATCCGGTAATACGACTCACTATAGGGGTTTCAGAGTTCTACAGTCCGACGATCENNNTCGTGNNNCGTGA  
193 GGTGATCCGGTAATACGACTCACTATAGGGGTTTCAGAGTTCTACAGTCCGACGATCENNNTGTNNNTGCGGA  
194 GGTGATCCGGTAATACGACTCACTATAGGGGTTTCAGAGTTCTACAGTCCGACGATCENNNTAGCNNNCTACGA  
195 GGTGATCCGGTAATACGACTCACTATAGGGGTTTCAGAGTTCTACAGTCCGACGATCENNNTCTNNNGCGTGA  
196 GGTGATCCGGTAATACGACTCACTATAGGGGTTTCAGAGTTCTACAGTCCGACGATCENNNTCAGANNNACCGGA  
197 GGTGATCCGGTAATACGACTCACTATAGGGGTTTCAGAGTTCTACAGTCCGACGATCENNNTGANNNCGCGGA  
198 GGTGATCCGGTAATACGACTCACTATAGGGGTTTCAGAGTTCTACAGTCCGACGATCENNNTGCNNNTAACGA  
199 GGTGATCCGGTAATACGACTCACTATAGGGGTTTCAGAGTTCTACAGTCCGACGATCENNNTGGTNNNGTCAGA  
200 GGTGATCCGGTAATACGACTCACTATAGGGGTTTCAGAGTTCTACAGTCCGACGATCENNNTGAGANNNCTAGGA  
201 GGTGATCCGGTAATACGACTCACTATAGGGGTTTCAGAGTTCTACAGTCCGACGATCENNNTAGGTNNNTATGGA  
202 GGTGATCCGGTAATACGACTCACTATAGGGGTTTCAGAGTTCTACAGTCCGACGATCENNNTGTNNNGCTGGA  
203 GGTGATCCGGTAATACGACTCACTATAGGGGTTTCAGAGTTCTACAGTCCGACGATCENNNTCATANNNTACGA  
204 GGTGATCCGGTAATACGACTCACTATAGGGGTTTCAGAGTTCTACAGTCCGACGATCENNNTAGTNNNTCCGGA  
205 GGTGATCCGGTAATACGACTCACTATAGGGGTTTCAGAGTTCTACAGTCCGACGATCENNNTCGGCNNNAGAAGA  
206 GGTGATCCGGTAATACGACTCACTATAGGGGTTTCAGAGTTCTACAGTCCGACGATCENNNTGACANNNCTTAGA  
207 GGTGATCCGGTAATACGACTCACTATAGGGGTTTCAGAGTTCTACAGTCCGACGATCENNNTGATANNNATCCGA  
208 GGTGATCCGGTAATACGACTCACTATAGGGGTTTCAGAGTTCTACAGTCCGACGATCENNNTGTNNNCTTAGA  
209 GGTGATCCGGTAATACGACTCACTATAGGGGTTTCAGAGTTCTACAGTCCGACGATCENNNTAGANNNCTCGA  
210 GGTGATCCGGTAATACGACTCACTATAGGGGTTTCAGAGTTCTACAGTCCGACGATCENNNTCGTNNNCTAGGA  
211 GGTGATCCGGTAATACGACTCACTATAGGGGTTTCAGAGTTCTACAGTCCGACGATCENNNTGCTCENNNTACGA  
212 GGTGATCCGGTAATACGACTCACTATAGGGGTTTCAGAGTTCTACAGTCCGACGATCENNNTTANNNGACAGA  
213 GGTGATCCGGTAATACGACTCACTATAGGGGTTTCAGAGTTCTACAGTCCGACGATCENNNTCGTGNNNCTCTGA  
214 GGTGATCCGGTAATACGACTCACTATAGGGGTTTCAGAGTTCTACAGTCCGACGATCENNNTGATNNNTGTTGA  
215 GGTGATCCGGTAATACGACTCACTATAGGGGTTTCAGAGTTCTACAGTCCGACGATCENNNTGACNNNATCAGA



216 GGTGATCCGGTAATACGACTCACTATAGGGGTTTCAGAGTTCTACAGTCCGACGATCNNNACTCNNNCAACGA  
217 GGTGATCCGGTAATACGACTCACTATAGGGGTTTCAGAGTTCTACAGTCCGACGATCNNNTCAGNNNTCTTGA  
218 GGTGATCCGGTAATACGACTCACTATAGGGGTTTCAGAGTTCTACAGTCCGACGATCNNNACCTNNNCGTTGA  
219 GGTGATCCGGTAATACGACTCACTATAGGGGTTTCAGAGTTCTACAGTCCGACGATCNNNATTNNNCGTGGA  
220 GGTGATCCGGTAATACGACTCACTATAGGGGTTTCAGAGTTCTACAGTCCGACGATCNNNTACTNNNTGCTGA  
221 GGTGATCCGGTAATACGACTCACTATAGGGGTTTCAGAGTTCTACAGTCCGACGATCNNNCAATNNNTGAGGA  
222 GGTGATCCGGTAATACGACTCACTATAGGGGTTTCAGAGTTCTACAGTCCGACGATCNNNTGCGNNNTGATGA  
223 GGTGATCCGGTAATACGACTCACTATAGGGGTTTCAGAGTTCTACAGTCCGACGATCNNNACGCNNNTCTCGA  
224 GGTGATCCGGTAATACGACTCACTATAGGGGTTTCAGAGTTCTACAGTCCGACGATCNNNTCTGNNNAGTGA  
225 GGTGATCCGGTAATACGACTCACTATAGGGGTTTCAGAGTTCTACAGTCCGACGATCNNNTCATNNNGACGGA  
226 GGTGATCCGGTAATACGACTCACTATAGGGGTTTCAGAGTTCTACAGTCCGACGATCNNNCGTCNNNTCTCGA  
227 GGTGATCCGGTAATACGACTCACTATAGGGGTTTCAGAGTTCTACAGTCCGACGATCNNNTGCGNNNATTGGA  
228 GGTGATCCGGTAATACGACTCACTATAGGGGTTTCAGAGTTCTACAGTCCGACGATCNNNCANNNACGCGA  
229 GGTGATCCGGTAATACGACTCACTATAGGGGTTTCAGAGTTCTACAGTCCGACGATCNNNAGTANNNCAAGGA  
230 GGTGATCCGGTAATACGACTCACTATAGGGGTTTCAGAGTTCTACAGTCCGACGATCNNNTGGANNNGCATGA  
231 GGTGATCCGGTAATACGACTCACTATAGGGGTTTCAGAGTTCTACAGTCCGACGATCNNNTCTCNNNGCGTGA  
232 GGTGATCCGGTAATACGACTCACTATAGGGGTTTCAGAGTTCTACAGTCCGACGATCNNNACGTNNNGAATGA  
233 GGTGATCCGGTAATACGACTCACTATAGGGGTTTCAGAGTTCTACAGTCCGACGATCNNNGATANNNTACGA  
234 GGTGATCCGGTAATACGACTCACTATAGGGGTTTCAGAGTTCTACAGTCCGACGATCNNNCAAGNNNACGCGA  
235 GGTGATCCGGTAATACGACTCACTATAGGGGTTTCAGAGTTCTACAGTCCGACGATCNNNGCAGNNNTGATGA  
236 GGTGATCCGGTAATACGACTCACTATAGGGGTTTCAGAGTTCTACAGTCCGACGATCNNNTACANNNCACGGA  
237 GGTGATCCGGTAATACGACTCACTATAGGGGTTTCAGAGTTCTACAGTCCGACGATCNNNTGTGNNNGCCTGA  
238 GGTGATCCGGTAATACGACTCACTATAGGGGTTTCAGAGTTCTACAGTCCGACGATCNNNGCAGNNNCAGTGA  
239 GGTGATCCGGTAATACGACTCACTATAGGGGTTTCAGAGTTCTACAGTCCGACGATCNNNCTCTNNNAGTTGA  
240 GGTGATCCGGTAATACGACTCACTATAGGGGTTTCAGAGTTCTACAGTCCGACGATCNNNCGTANNNATGAGA  
241 GGTGATCCGGTAATACGACTCACTATAGGGGTTTCAGAGTTCTACAGTCCGACGATCNNNTCGANNNCGCAGA  
242 GGTGATCCGGTAATACGACTCACTATAGGGGTTTCAGAGTTCTACAGTCCGACGATCNNNCAATNNNCTCCGA  
243 GGTGATCCGGTAATACGACTCACTATAGGGGTTTCAGAGTTCTACAGTCCGACGATCNNNTCANNNGCCAGA  
244 GGTGATCCGGTAATACGACTCACTATAGGGGTTTCAGAGTTCTACAGTCCGACGATCNNNATTNNNCACAGA  
245 GGTGATCCGGTAATACGACTCACTATAGGGGTTTCAGAGTTCTACAGTCCGACGATCNNNACCNNNATAAGA  
246 GGTGATCCGGTAATACGACTCACTATAGGGGTTTCAGAGTTCTACAGTCCGACGATCNNNATGANNNCTCGGA  
247 GGTGATCCGGTAATACGACTCACTATAGGGGTTTCAGAGTTCTACAGTCCGACGATCNNNTGCTNNNGAGAGA  
248 GGTGATCCGGTAATACGACTCACTATAGGGGTTTCAGAGTTCTACAGTCCGACGATCNNNATTGNNNGAACGA  
249 GGTGATCCGGTAATACGACTCACTATAGGGGTTTCAGAGTTCTACAGTCCGACGATCNNNTCTGNNNCGGAGA  
250 GGTGATCCGGTAATACGACTCACTATAGGGGTTTCAGAGTTCTACAGTCCGACGATCNNNCGTNNNATACGA  
251 GGTGATCCGGTAATACGACTCACTATAGGGGTTTCAGAGTTCTACAGTCCGACGATCNNNTATCNNNCTGAGA  
252 GGTGATCCGGTAATACGACTCACTATAGGGGTTTCAGAGTTCTACAGTCCGACGATCNNNCGTANNNACTTGA  
253 GGTGATCCGGTAATACGACTCACTATAGGGGTTTCAGAGTTCTACAGTCCGACGATCNNNCTAGNNNACTGA  
254 GGTGATCCGGTAATACGACTCACTATAGGGGTTTCAGAGTTCTACAGTCCGACGATCNNNCAGCANNNACATGA  
255 GGTGATCCGGTAATACGACTCACTATAGGGGTTTCAGAGTTCTACAGTCCGACGATCNNNGTAGNNNACTTGA  
256 GGTGATCCGGTAATACGACTCACTATAGGGGTTTCAGAGTTCTACAGTCCGACGATCNNNGTGANNNGAAGGA  
257 GGTGATCCGGTAATACGACTCACTATAGGGGTTTCAGAGTTCTACAGTCCGACGATCNNNCAGANNNTGATGA  
258 GGTGATCCGGTAATACGACTCACTATAGGGGTTTCAGAGTTCTACAGTCCGACGATCNNNTCTGNNNTGACGA  
259 GGTGATCCGGTAATACGACTCACTATAGGGGTTTCAGAGTTCTACAGTCCGACGATCNNNTGCTNNNTAACGA  
260 GGTGATCCGGTAATACGACTCACTATAGGGGTTTCAGAGTTCTACAGTCCGACGATCNNNTCCGNNNTCCAGA  
261 GGTGATCCGGTAATACGACTCACTATAGGGGTTTCAGAGTTCTACAGTCCGACGATCNNNGACTNNNACAGGA  
262 GGTGATCCGGTAATACGACTCACTATAGGGGTTTCAGAGTTCTACAGTCCGACGATCNNNTAGTNNNGCGTGA  
263 GGTGATCCGGTAATACGACTCACTATAGGGGTTTCAGAGTTCTACAGTCCGACGATCNNNCATCNNNATCAGA  
264 GGTGATCCGGTAATACGACTCACTATAGGGGTTTCAGAGTTCTACAGTCCGACGATCNNNATTNNNATGCGA  
265 GGTGATCCGGTAATACGACTCACTATAGGGGTTTCAGAGTTCTACAGTCCGACGATCNNNTGCANNNCAACGA  
266 GGTGATCCGGTAATACGACTCACTATAGGGGTTTCAGAGTTCTACAGTCCGACGATCNNNGTTCNNNATTGGA  
267 GGTGATCCGGTAATACGACTCACTATAGGGGTTTCAGAGTTCTACAGTCCGACGATCNNNTGAGNNNGTCGGA  
268 GGTGATCCGGTAATACGACTCACTATAGGGGTTTCAGAGTTCTACAGTCCGACGATCNNNAGGTNNNTGAAGA  
269 GGTGATCCGGTAATACGACTCACTATAGGGGTTTCAGAGTTCTACAGTCCGACGATCNNNATATNNNGCCGGA  
270 GGTGATCCGGTAATACGACTCACTATAGGGGTTTCAGAGTTCTACAGTCCGACGATCNNNACGTNNNTGACGA  
271 GGTGATCCGGTAATACGACTCACTATAGGGGTTTCAGAGTTCTACAGTCCGACGATCNNNTGGANNNGACCGA  
272 GGTGATCCGGTAATACGACTCACTATAGGGGTTTCAGAGTTCTACAGTCCGACGATCNNNTCCANNNAGCGGA  
273 GGTGATCCGGTAATACGACTCACTATAGGGGTTTCAGAGTTCTACAGTCCGACGATCNNNGACANNNACCAGA  
274 GGTGATCCGGTAATACGACTCACTATAGGGGTTTCAGAGTTCTACAGTCCGACGATCNNNAGTNNNAGGCGA  
275 GGTGATCCGGTAATACGACTCACTATAGGGGTTTCAGAGTTCTACAGTCCGACGATCNNNACAGNNNTCTGA  
276 GGTGATCCGGTAATACGACTCACTATAGGGGTTTCAGAGTTCTACAGTCCGACGATCNNNCGTNNNTCTGA  
277 GGTGATCCGGTAATACGACTCACTATAGGGGTTTCAGAGTTCTACAGTCCGACGATCNNNTGTGNNNTCGCGA  
278 GGTGATCCGGTAATACGACTCACTATAGGGGTTTCAGAGTTCTACAGTCCGACGATCNNNTATGNNNATGCGA  
279 GGTGATCCGGTAATACGACTCACTATAGGGGTTTCAGAGTTCTACAGTCCGACGATCNNNACGTNNNTAGAGA  
280 GGTGATCCGGTAATACGACTCACTATAGGGGTTTCAGAGTTCTACAGTCCGACGATCNNNCTAGNNNAGTGA  
281 GGTGATCCGGTAATACGACTCACTATAGGGGTTTCAGAGTTCTACAGTCCGACGATCNNNTGCTNNNACGAGA  
282 GGTGATCCGGTAATACGACTCACTATAGGGGTTTCAGAGTTCTACAGTCCGACGATCNNNCGGTNNNTATGA  
283 GGTGATCCGGTAATACGACTCACTATAGGGGTTTCAGAGTTCTACAGTCCGACGATCNNNATGNNNNGTGA  
284 GGTGATCCGGTAATACGACTCACTATAGGGGTTTCAGAGTTCTACAGTCCGACGATCNNNCTGCNNNTCTGGA  
285 GGTGATCCGGTAATACGACTCACTATAGGGGTTTCAGAGTTCTACAGTCCGACGATCNNNACANNNCATAGA  
286 GGTGATCCGGTAATACGACTCACTATAGGGGTTTCAGAGTTCTACAGTCCGACGATCNNNACTANNNTGACGA  
287 GGTGATCCGGTAATACGACTCACTATAGGGGTTTCAGAGTTCTACAGTCCGACGATCNNNCTCANNNACAAGA  
288 GGTGATCCGGTAATACGACTCACTATAGGGGTTTCAGAGTTCTACAGTCCGACGATCNNNTAACNNNGCTTGA

289 GGTGATCCGGTAATACGACTCACTATAGGGGTTTCAGAGTTCTACAGTCCGACGATCNNNCGATNNNTCACGA  
290 GGTGATCCGGTAATACGACTCACTATAGGGGTTTCAGAGTTCTACAGTCCGACGATCNNNTAAGNNNTGTGGA  
291 GGTGATCCGGTAATACGACTCACTATAGGGGTTTCAGAGTTCTACAGTCCGACGATCNNNACTGNNNGTGCGA  
292 GGTGATCCGGTAATACGACTCACTATAGGGGTTTCAGAGTTCTACAGTCCGACGATCNNNGTTCNNNACCAGA  
293 GGTGATCCGGTAATACGACTCACTATAGGGGTTTCAGAGTTCTACAGTCCGACGATCNNNCGTANNNTCCAGA  
294 GGTGATCCGGTAATACGACTCACTATAGGGGTTTCAGAGTTCTACAGTCCGACGATCNNNTATANNNCGCGCA  
295 GGTGATCCGGTAATACGACTCACTATAGGGGTTTCAGAGTTCTACAGTCCGACGATCNNNCAAGNNNAGACGA  
296 GGTGATCCGGTAATACGACTCACTATAGGGGTTTCAGAGTTCTACAGTCCGACGATCNNNTGCTNNNTCTTGA  
297 GGTGATCCGGTAATACGACTCACTATAGGGGTTTCAGAGTTCTACAGTCCGACGATCNNNTGCTNNNTCTATGA  
298 GGTGATCCGGTAATACGACTCACTATAGGGGTTTCAGAGTTCTACAGTCCGACGATCNNNTCCTNNNGCCTGA  
299 GGTGATCCGGTAATACGACTCACTATAGGGGTTTCAGAGTTCTACAGTCCGACGATCNNNTAAGNNNAGCAGA  
300 GGTGATCCGGTAATACGACTCACTATAGGGGTTTCAGAGTTCTACAGTCCGACGATCNNNACTGNNNCTTAGA  
301 GGTGATCCGGTAATACGACTCACTATAGGGGTTTCAGAGTTCTACAGTCCGACGATCNNNTCGANNNGTGA  
302 GGTGATCCGGTAATACGACTCACTATAGGGGTTTCAGAGTTCTACAGTCCGACGATCNNNTGCTNNNGTATGA  
303 GGTGATCCGGTAATACGACTCACTATAGGGGTTTCAGAGTTCTACAGTCCGACGATCNNNTGGANNNATCGGA  
304 GGTGATCCGGTAATACGACTCACTATAGGGGTTTCAGAGTTCTACAGTCCGACGATCNNNATCGNNNTACGGA  
305 GGTGATCCGGTAATACGACTCACTATAGGGGTTTCAGAGTTCTACAGTCCGACGATCNNNTCTCNNNAGAAGA  
306 GGTGATCCGGTAATACGACTCACTATAGGGGTTTCAGAGTTCTACAGTCCGACGATCNNNTCTANNNGACTGA  
307 GGTGATCCGGTAATACGACTCACTATAGGGGTTTCAGAGTTCTACAGTCCGACGATCNNNCAAGNNNAGCATGA  
308 GGTGATCCGGTAATACGACTCACTATAGGGGTTTCAGAGTTCTACAGTCCGACGATCNNNCTCANNNTCCTGA  
309 GGTGATCCGGTAATACGACTCACTATAGGGGTTTCAGAGTTCTACAGTCCGACGATCNNNCTGNNNCTGCGA  
310 GGTGATCCGGTAATACGACTCACTATAGGGGTTTCAGAGTTCTACAGTCCGACGATCNNNTCCTNNNGTGA  
311 GGTGATCCGGTAATACGACTCACTATAGGGGTTTCAGAGTTCTACAGTCCGACGATCNNNTCGTNNNACAGGA  
312 GGTGATCCGGTAATACGACTCACTATAGGGGTTTCAGAGTTCTACAGTCCGACGATCNNNGTTCNNNGTGAGA  
313 GGTGATCCGGTAATACGACTCACTATAGGGGTTTCAGAGTTCTACAGTCCGACGATCNNNCTCANNNGCCTGA  
314 GGTGATCCGGTAATACGACTCACTATAGGGGTTTCAGAGTTCTACAGTCCGACGATCNNNCTCTNNNACCGA  
315 GGTGATCCGGTAATACGACTCACTATAGGGGTTTCAGAGTTCTACAGTCCGACGATCNNNATAGNNNGCCTGA  
316 GGTGATCCGGTAATACGACTCACTATAGGGGTTTCAGAGTTCTACAGTCCGACGATCNNNCTCTNNNATGCGA  
317 GGTGATCCGGTAATACGACTCACTATAGGGGTTTCAGAGTTCTACAGTCCGACGATCNNNCTGCNNNGTTCGA  
318 GGTGATCCGGTAATACGACTCACTATAGGGGTTTCAGAGTTCTACAGTCCGACGATCNNNTCCGNNNACATGA  
319 GGTGATCCGGTAATACGACTCACTATAGGGGTTTCAGAGTTCTACAGTCCGACGATCNNNCTGANNNGCCTGA  
320 GGTGATCCGGTAATACGACTCACTATAGGGGTTTCAGAGTTCTACAGTCCGACGATCNNNGTTCNNNCTGAGA  
321 GGTGATCCGGTAATACGACTCACTATAGGGGTTTCAGAGTTCTACAGTCCGACGATCNNNCAGTNNNCGCTGA  
322 GGTGATCCGGTAATACGACTCACTATAGGGGTTTCAGAGTTCTACAGTCCGACGATCNNNGACTNNNGTTCGA  
323 GGTGATCCGGTAATACGACTCACTATAGGGGTTTCAGAGTTCTACAGTCCGACGATCNNNTCTANNNTCCGGA  
324 GGTGATCCGGTAATACGACTCACTATAGGGGTTTCAGAGTTCTACAGTCCGACGATCNNNATGCNNNTGCTGA  
325 GGTGATCCGGTAATACGACTCACTATAGGGGTTTCAGAGTTCTACAGTCCGACGATCNNNCTATNNNTGCTGA  
326 GGTGATCCGGTAATACGACTCACTATAGGGGTTTCAGAGTTCTACAGTCCGACGATCNNNTCTCNNNACTGA  
327 GGTGATCCGGTAATACGACTCACTATAGGGGTTTCAGAGTTCTACAGTCCGACGATCNNNTCGCNNNTACGGA  
328 GGTGATCCGGTAATACGACTCACTATAGGGGTTTCAGAGTTCTACAGTCCGACGATCNNNATCANNNGTGTGA  
329 GGTGATCCGGTAATACGACTCACTATAGGGGTTTCAGAGTTCTACAGTCCGACGATCNNNGTTCNNNCTCAGA  
330 GGTGATCCGGTAATACGACTCACTATAGGGGTTTCAGAGTTCTACAGTCCGACGATCNNNGTTCNNNACTGA  
331 GGTGATCCGGTAATACGACTCACTATAGGGGTTTCAGAGTTCTACAGTCCGACGATCNNNAGCANNNGTTCGA  
332 GGTGATCCGGTAATACGACTCACTATAGGGGTTTCAGAGTTCTACAGTCCGACGATCNNNTCCTNNNCTGAGA  
333 GGTGATCCGGTAATACGACTCACTATAGGGGTTTCAGAGTTCTACAGTCCGACGATCNNNTGGTNNNAGCCGA  
334 GGTGATCCGGTAATACGACTCACTATAGGGGTTTCAGAGTTCTACAGTCCGACGATCNNNATGCNNNGCCAGA  
335 GGTGATCCGGTAATACGACTCACTATAGGGGTTTCAGAGTTCTACAGTCCGACGATCNNNGCGCANNNATAGA  
336 GGTGATCCGGTAATACGACTCACTATAGGGGTTTCAGAGTTCTACAGTCCGACGATCNNNAGTNNNACTGA  
337 GGTGATCCGGTAATACGACTCACTATAGGGGTTTCAGAGTTCTACAGTCCGACGATCNNNCTATNNNTGCTGA  
338 GGTGATCCGGTAATACGACTCACTATAGGGGTTTCAGAGTTCTACAGTCCGACGATCNNNTGCTNNNCTCGGA  
339 GGTGATCCGGTAATACGACTCACTATAGGGGTTTCAGAGTTCTACAGTCCGACGATCNNNAGCTNNNCTTAGA  
340 GGTGATCCGGTAATACGACTCACTATAGGGGTTTCAGAGTTCTACAGTCCGACGATCNNNTCGTNNNGTTCGA  
341 GGTGATCCGGTAATACGACTCACTATAGGGGTTTCAGAGTTCTACAGTCCGACGATCNNNATCGNNNGTCCGA  
342 GGTGATCCGGTAATACGACTCACTATAGGGGTTTCAGAGTTCTACAGTCCGACGATCNNNAGTNNNACTGA  
343 GGTGATCCGGTAATACGACTCACTATAGGGGTTTCAGAGTTCTACAGTCCGACGATCNNNCTCGNNNGTTCGA  
344 GGTGATCCGGTAATACGACTCACTATAGGGGTTTCAGAGTTCTACAGTCCGACGATCNNNAGATNNNCTGCGA  
345 GGTGATCCGGTAATACGACTCACTATAGGGGTTTCAGAGTTCTACAGTCCGACGATCNNNTGTANNNTGCCGA  
346 GGTGATCCGGTAATACGACTCACTATAGGGGTTTCAGAGTTCTACAGTCCGACGATCNNNCAATNNNGTGTGA  
347 GGTGATCCGGTAATACGACTCACTATAGGGGTTTCAGAGTTCTACAGTCCGACGATCNNNCGCANNNTAGAGA  
348 GGTGATCCGGTAATACGACTCACTATAGGGGTTTCAGAGTTCTACAGTCCGACGATCNNNCGTNNNACTGA  
349 GGTGATCCGGTAATACGACTCACTATAGGGGTTTCAGAGTTCTACAGTCCGACGATCNNNTGTANNNGTTCGA  
350 GGTGATCCGGTAATACGACTCACTATAGGGGTTTCAGAGTTCTACAGTCCGACGATCNNNTGGTNNNACTGA  
351 GGTGATCCGGTAATACGACTCACTATAGGGGTTTCAGAGTTCTACAGTCCGACGATCNNNGTGANNNATCAGA  
352 GGTGATCCGGTAATACGACTCACTATAGGGGTTTCAGAGTTCTACAGTCCGACGATCNNNACCANNNTGCTGA  
353 GGTGATCCGGTAATACGACTCACTATAGGGGTTTCAGAGTTCTACAGTCCGACGATCNNNGCGANNNGTTCGA  
354 GGTGATCCGGTAATACGACTCACTATAGGGGTTTCAGAGTTCTACAGTCCGACGATCNNNCGAGNNNAGGAGA  
355 GGTGATCCGGTAATACGACTCACTATAGGGGTTTCAGAGTTCTACAGTCCGACGATCNNNCTCGNNNCTGGA  
356 GGTGATCCGGTAATACGACTCACTATAGGGGTTTCAGAGTTCTACAGTCCGACGATCNNNGCCTNNNCTTCGA  
357 GGTGATCCGGTAATACGACTCACTATAGGGGTTTCAGAGTTCTACAGTCCGACGATCNNNGAGTNNNTAAGGA  
358 GGTGATCCGGTAATACGACTCACTATAGGGGTTTCAGAGTTCTACAGTCCGACGATCNNNCTGCNNNGACTGA  
359 GGTGATCCGGTAATACGACTCACTATAGGGGTTTCAGAGTTCTACAGTCCGACGATCNNNCTANNNCTAGGA  
360 GGTGATCCGGTAATACGACTCACTATAGGGGTTTCAGAGTTCTACAGTCCGACGATCNNNGTGTNNNTCGCGA  
361 GGTGATCCGGTAATACGACTCACTATAGGGGTTTCAGAGTTCTACAGTCCGACGATCNNNTGCTNNNCGAAGA

362 GGTGATCCGGTAATACGACTCACTATAGGGGTTTCAGAGTTCTACAGTCCGACGATCANNNGTGCNNNACACGA  
363 GGTGATCCGGTAATACGACTCACTATAGGGGTTTCAGAGTTCTACAGTCCGACGATCANNNGTGNNGTTCGA  
364 GGTGATCCGGTAATACGACTCACTATAGGGGTTTCAGAGTTCTACAGTCCGACGATCANNNTCTCNNNGTCTGA  
365 GGTGATCCGGTAATACGACTCACTATAGGGGTTTCAGAGTTCTACAGTCCGACGATCANNNTCTGNNGAGTGA  
366 GGTGATCCGGTAATACGACTCACTATAGGGGTTTCAGAGTTCTACAGTCCGACGATCANNNTGTGNNGCAGCA  
367 GGTGATCCGGTAATACGACTCACTATAGGGGTTTCAGAGTTCTACAGTCCGACGATCANNNTAGNNGTGGGA  
368 GGTGATCCGGTAATACGACTCACTATAGGGGTTTCAGAGTTCTACAGTCCGACGATCANNNGTANNNCATGGA  
369 GGTGATCCGGTAATACGACTCACTATAGGGGTTTCAGAGTTCTACAGTCCGACGATCANNNTAGCANNNGCAGGA  
370 GGTGATCCGGTAATACGACTCACTATAGGGGTTTCAGAGTTCTACAGTCCGACGATCANNNTCTGNNGTATGA  
371 GGTGATCCGGTAATACGACTCACTATAGGGGTTTCAGAGTTCTACAGTCCGACGATCANNNGTGCNNNTATGGA  
372 GGTGATCCGGTAATACGACTCACTATAGGGGTTTCAGAGTTCTACAGTCCGACGATCANNNGATCANNNTCTCGA  
373 GGTGATCCGGTAATACGACTCACTATAGGGGTTTCAGAGTTCTACAGTCCGACGATCANNNTGGCANNNGAGTGA  
374 GGTGATCCGGTAATACGACTCACTATAGGGGTTTCAGAGTTCTACAGTCCGACGATCANNNGCANNNGTTCGA  
375 GGTGATCCGGTAATACGACTCACTATAGGGGTTTCAGAGTTCTACAGTCCGACGATCANNNCAGTNNNTGTAGA  
376 GGTGATCCGGTAATACGACTCACTATAGGGGTTTCAGAGTTCTACAGTCCGACGATCANNNTCTCNNNGTATGA  
377 GGTGATCCGGTAATACGACTCACTATAGGGGTTTCAGAGTTCTACAGTCCGACGATCANNNTGAGNNGCAGCA  
378 GGTGATCCGGTAATACGACTCACTATAGGGGTTTCAGAGTTCTACAGTCCGACGATCANNNGTTCNNNTACGA  
379 GGTGATCCGGTAATACGACTCACTATAGGGGTTTCAGAGTTCTACAGTCCGACGATCANNNGCANNNTGAGGA  
380 GGTGATCCGGTAATACGACTCACTATAGGGGTTTCAGAGTTCTACAGTCCGACGATCANNNGTGNNTACAGA  
381 GGTGATCCGGTAATACGACTCACTATAGGGGTTTCAGAGTTCTACAGTCCGACGATCANNNAGANNNGAGTGA  
382 GGTGATCCGGTAATACGACTCACTATAGGGGTTTCAGAGTTCTACAGTCCGACGATCANNNGCGTNNNTCATGA  
383 GGTGATCCGGTAATACGACTCACTATAGGGGTTTCAGAGTTCTACAGTCCGACGATCANNNTGCGNNNAGGAGA  
384 GGTGATCCGGTAATACGACTCACTATAGGGGTTTCAGAGTTCTACAGTCCGACGATCANNNGCTNNNGTTCGA

Bottom Sequence

1 /5Phos/TCCATANNNTGCANNNGATCGTCGGACTGTAGAACTCTGAACCCCTATAGTGAGTCGTATTACCGGGAGCTT  
2 /5Phos/TCTTCANNNGCACNNNGATCGTCGGACTGTAGAACTCTGAACCCCTATAGTGAGTCGTATTACCGGGAGCTT  
3 /5Phos/TCGAGANNNCAGCANNNGATCGTCGGACTGTAGAACTCTGAACCCCTATAGTGAGTCGTATTACCGGGAGCTT  
4 /5Phos/TCCGATNNNTACNNNGATCGTCGGACTGTAGAACTCTGAACCCCTATAGTGAGTCGTATTACCGGGAGCTT  
5 /5Phos/TCAGTCNNNAGATNNNGATCGTCGGACTGTAGAACTCTGAACCCCTATAGTGAGTCGTATTACCGGGAGCTT  
6 /5Phos/TCGGCTNNNCAACNNNGATCGTCGGACTGTAGAACTCTGAACCCCTATAGTGAGTCGTATTACCGGGAGCTT  
7 /5Phos/TCGGATNNNGTGCNNNGATCGTCGGACTGTAGAACTCTGAACCCCTATAGTGAGTCGTATTACCGGGAGCTT  
8 /5Phos/TCAGTCNNNATCANNNGATCGTCGGACTGTAGAACTCTGAACCCCTATAGTGAGTCGTATTACCGGGAGCTT  
9 /5Phos/TCTGGCANNNTAGCANNNGATCGTCGGACTGTAGAACTCTGAACCCCTATAGTGAGTCGTATTACCGGGAGCTT  
10 /5Phos/TCTTAGNNNTCANNNGATCGTCGGACTGTAGAACTCTGAACCCCTATAGTGAGTCGTATTACCGGGAGCTT  
11 /5Phos/TCCTGANNNGCANNNGATCGTCGGACTGTAGAACTCTGAACCCCTATAGTGAGTCGTATTACCGGGAGCTT  
12 /5Phos/TCTTACNNNGTGCNNNGATCGTCGGACTGTAGAACTCTGAACCCCTATAGTGAGTCGTATTACCGGGAGCTT  
13 /5Phos/TCACGTNNNGTATNNNGATCGTCGGACTGTAGAACTCTGAACCCCTATAGTGAGTCGTATTACCGGGAGCTT  
14 /5Phos/TCAGACNNNTAACNNNGATCGTCGGACTGTAGAACTCTGAACCCCTATAGTGAGTCGTATTACCGGGAGCTT  
15 /5Phos/TCCATCANNNTCANNNGATCGTCGGACTGTAGAACTCTGAACCCCTATAGTGAGTCGTATTACCGGGAGCTT  
16 /5Phos/TCATTGNNNTCANNNGATCGTCGGACTGTAGAACTCTGAACCCCTATAGTGAGTCGTATTACCGGGAGCTT  
17 /5Phos/TCTCCANNNTCANNNGATCGTCGGACTGTAGAACTCTGAACCCCTATAGTGAGTCGTATTACCGGGAGCTT  
18 /5Phos/TCGTGANNNGCANNNGATCGTCGGACTGTAGAACTCTGAACCCCTATAGTGAGTCGTATTACCGGGAGCTT  
19 /5Phos/TCCGTCNNNCATANNNGATCGTCGGACTGTAGAACTCTGAACCCCTATAGTGAGTCGTATTACCGGGAGCTT  
20 /5Phos/TCGATANNNACCANNNGATCGTCGGACTGTAGAACTCTGAACCCCTATAGTGAGTCGTATTACCGGGAGCTT  
21 /5Phos/TCCTCANNNGATGNNNGATCGTCGGACTGTAGAACTCTGAACCCCTATAGTGAGTCGTATTACCGGGAGCTT  
22 /5Phos/TCACGCNNNTACTNNNGATCGTCGGACTGTAGAACTCTGAACCCCTATAGTGAGTCGTATTACCGGGAGCTT  
23 /5Phos/TCAAGTNNNTCANNNGATCGTCGGACTGTAGAACTCTGAACCCCTATAGTGAGTCGTATTACCGGGAGCTT  
24 /5Phos/TCGCTANNNTAGANNNGATCGTCGGACTGTAGAACTCTGAACCCCTATAGTGAGTCGTATTACCGGGAGCTT  
25 /5Phos/TCATCANNNTGACNNNGATCGTCGGACTGTAGAACTCTGAACCCCTATAGTGAGTCGTATTACCGGGAGCTT  
26 /5Phos/TCACCGNNNACCANNNGATCGTCGGACTGTAGAACTCTGAACCCCTATAGTGAGTCGTATTACCGGGAGCTT  
27 /5Phos/TCATGCNNNTACTNNNGATCGTCGGACTGTAGAACTCTGAACCCCTATAGTGAGTCGTATTACCGGGAGCTT  
28 /5Phos/TCTCTCANNNTACTNNNGATCGTCGGACTGTAGAACTCTGAACCCCTATAGTGAGTCGTATTACCGGGAGCTT  
29 /5Phos/TCATTGNNNCGANNNGATCGTCGGACTGTAGAACTCTGAACCCCTATAGTGAGTCGTATTACCGGGAGCTT  
30 /5Phos/TCAGCANNNGCANNNGATCGTCGGACTGTAGAACTCTGAACCCCTATAGTGAGTCGTATTACCGGGAGCTT  
31 /5Phos/TCTCGTNNNTAGANNNGATCGTCGGACTGTAGAACTCTGAACCCCTATAGTGAGTCGTATTACCGGGAGCTT  
32 /5Phos/TCTTGCNNNCGANNNGATCGTCGGACTGTAGAACTCTGAACCCCTATAGTGAGTCGTATTACCGGGAGCTT  
33 /5Phos/TCATACNNNGCANNNGATCGTCGGACTGTAGAACTCTGAACCCCTATAGTGAGTCGTATTACCGGGAGCTT  
34 /5Phos/TCGATGNNNTCANNNGATCGTCGGACTGTAGAACTCTGAACCCCTATAGTGAGTCGTATTACCGGGAGCTT  
35 /5Phos/TCTATCANNNCAGCANNNGATCGTCGGACTGTAGAACTCTGAACCCCTATAGTGAGTCGTATTACCGGGAGCTT  
36 /5Phos/TCCACTNNNTCANNNGATCGTCGGACTGTAGAACTCTGAACCCCTATAGTGAGTCGTATTACCGGGAGCTT  
37 /5Phos/TCTTACNNNCATGNNNGATCGTCGGACTGTAGAACTCTGAACCCCTATAGTGAGTCGTATTACCGGGAGCTT  
38 /5Phos/TCTCAGNNNTAGCANNNGATCGTCGGACTGTAGAACTCTGAACCCCTATAGTGAGTCGTATTACCGGGAGCTT  
39 /5Phos/TCTACANNNGTTCANNNGATCGTCGGACTGTAGAACTCTGAACCCCTATAGTGAGTCGTATTACCGGGAGCTT  
40 /5Phos/TCTGAGNNNTGGTNNNGATCGTCGGACTGTAGAACTCTGAACCCCTATAGTGAGTCGTATTACCGGGAGCTT  
41 /5Phos/TCGTCGNNNTCATNNNGATCGTCGGACTGTAGAACTCTGAACCCCTATAGTGAGTCGTATTACCGGGAGCTT  
42 /5Phos/TCCACTANNNGTACNNNGATCGTCGGACTGTAGAACTCTGAACCCCTATAGTGAGTCGTATTACCGGGAGCTT  
43 /5Phos/TCCGACNNNTACTGNNNGATCGTCGGACTGTAGAACTCTGAACCCCTATAGTGAGTCGTATTACCGGGAGCTT  
44 /5Phos/TCACGANNNTACTNNNGATCGTCGGACTGTAGAACTCTGAACCCCTATAGTGAGTCGTATTACCGGGAGCTT  
45 /5Phos/TCGAGTNNNCATGNNNGATCGTCGGACTGTAGAACTCTGAACCCCTATAGTGAGTCGTATTACCGGGAGCTT  
46 /5Phos/TCATACNNNACAGNNNGATCGTCGGACTGTAGAACTCTGAACCCCTATAGTGAGTCGTATTACCGGGAGCTT  
47 /5Phos/TCGCCTNNNACATNNNGATCGTCGGACTGTAGAACTCTGAACCCCTATAGTGAGTCGTATTACCGGGAGCTT  
48 /5Phos/TCGACGNNNGTGNNGATCGTCGGACTGTAGAACTCTGAACCCCTATAGTGAGTCGTATTACCGGGAGCTT

49 /5Phos/TCGAGANNNGCTCNNGGATCGTCGGACTGTAGAACTCTGAACCCCTATAGTGAGTCGTATTACCGGGAGCTT  
50 /5Phos/TCCAGANNNGACANNNGATCGTCGGACTGTAGAACTCTGAACCCCTATAGTGAGTCGTATTACCGGGAGCTT  
51 /5Phos/TCCGGANNNCATCNNGGATCGTCGGACTGTAGAACTCTGAACCCCTATAGTGAGTCGTATTACCGGGAGCTT  
52 /5Phos/TCCGTCNNNGAACNNNGATCGTCGGACTGTAGAACTCTGAACCCCTATAGTGAGTCGTATTACCGGGAGCTT  
53 /5Phos/TCACAGNNNGTAGNNNGATCGTCGGACTGTAGAACTCTGAACCCCTATAGTGAGTCGTATTACCGGGAGCTT  
54 /5Phos/TCAAGANNNGGTCNNNGATCGTCGGACTGTAGAACTCTGAACCCCTATAGTGAGTCGTATTACCGGGAGCTT  
55 /5Phos/TCCAGCANNNGATCNNGGATCGTCGGACTGTAGAACTCTGAACCCCTATAGTGAGTCGTATTACCGGGAGCTT  
56 /5Phos/TCGCANNNTCAGNNNGATCGTCGGACTGTAGAACTCTGAACCCCTATAGTGAGTCGTATTACCGGGAGCTT  
57 /5Phos/TCAGCTNNNGTTCNNNGATCGTCGGACTGTAGAACTCTGAACCCCTATAGTGAGTCGTATTACCGGGAGCTT  
58 /5Phos/TCTTGANNNACAGNNNGATCGTCGGACTGTAGAACTCTGAACCCCTATAGTGAGTCGTATTACCGGGAGCTT  
59 /5Phos/TCTGCANNNTAACNNNGATCGTCGGACTGTAGAACTCTGAACCCCTATAGTGAGTCGTATTACCGGGAGCTT  
60 /5Phos/TCTCCTNNNGATCNNGGATCGTCGGACTGTAGAACTCTGAACCCCTATAGTGAGTCGTATTACCGGGAGCTT  
61 /5Phos/TCCAATNNNTGCGNNNGATCGTCGGACTGTAGAACTCTGAACCCCTATAGTGAGTCGTATTACCGGGAGCTT  
62 /5Phos/TCCGCTNNNAGGANNNGATCGTCGGACTGTAGAACTCTGAACCCCTATAGTGAGTCGTATTACCGGGAGCTT  
63 /5Phos/TCCGGANNNAGACNNNGATCGTCGGACTGTAGAACTCTGAACCCCTATAGTGAGTCGTATTACCGGGAGCTT  
64 /5Phos/TCTGCTNNNTCCTNNNGATCGTCGGACTGTAGAACTCTGAACCCCTATAGTGAGTCGTATTACCGGGAGCTT  
65 /5Phos/TCGGACNNNGACANNNGATCGTCGGACTGTAGAACTCTGAACCCCTATAGTGAGTCGTATTACCGGGAGCTT  
66 /5Phos/TCGTTNNNCGTCNNNGATCGTCGGACTGTAGAACTCTGAACCCCTATAGTGAGTCGTATTACCGGGAGCTT  
67 /5Phos/TCAGANNNGCAGNNNGATCGTCGGACTGTAGAACTCTGAACCCCTATAGTGAGTCGTATTACCGGGAGCTT  
68 /5Phos/TCCANNNNATGTTNNNGATCGTCGGACTGTAGAACTCTGAACCCCTATAGTGAGTCGTATTACCGGGAGCTT  
69 /5Phos/TCCGCGNNNCAATNNNGATCGTCGGACTGTAGAACTCTGAACCCCTATAGTGAGTCGTATTACCGGGAGCTT  
70 /5Phos/TCACCANNNGCTCNNGGATCGTCGGACTGTAGAACTCTGAACCCCTATAGTGAGTCGTATTACCGGGAGCTT  
71 /5Phos/TCCTCTNNNCGAGNNNGATCGTCGGACTGTAGAACTCTGAACCCCTATAGTGAGTCGTATTACCGGGAGCTT  
72 /5Phos/TCGCANNNGAACNNNGATCGTCGGACTGTAGAACTCTGAACCCCTATAGTGAGTCGTATTACCGGGAGCTT  
73 /5Phos/TCAGCANNNGCAGNNNGATCGTCGGACTGTAGAACTCTGAACCCCTATAGTGAGTCGTATTACCGGGAGCTT  
74 /5Phos/TCCTACNNNTGCGNNNGATCGTCGGACTGTAGAACTCTGAACCCCTATAGTGAGTCGTATTACCGGGAGCTT  
75 /5Phos/TCCTCTNNNGTGCNNNGATCGTCGGACTGTAGAACTCTGAACCCCTATAGTGAGTCGTATTACCGGGAGCTT  
76 /5Phos/TCGGTANNNAGGANNNGATCGTCGGACTGTAGAACTCTGAACCCCTATAGTGAGTCGTATTACCGGGAGCTT  
77 /5Phos/TCGATCANNNTGAGNNNGATCGTCGGACTGTAGAACTCTGAACCCCTATAGTGAGTCGTATTACCGGGAGCTT  
78 /5Phos/TCGTGTTNNCTGTNNNGATCGTCGGACTGTAGAACTCTGAACCCCTATAGTGAGTCGTATTACCGGGAGCTT  
79 /5Phos/TCAGANNNGCAGNNNGATCGTCGGACTGTAGAACTCTGAACCCCTATAGTGAGTCGTATTACCGGGAGCTT  
80 /5Phos/TCAGGTNNNGACTNNNGATCGTCGGACTGTAGAACTCTGAACCCCTATAGTGAGTCGTATTACCGGGAGCTT  
81 /5Phos/TCTACTNNNGCATNNNGATCGTCGGACTGTAGAACTCTGAACCCCTATAGTGAGTCGTATTACCGGGAGCTT  
82 /5Phos/TCATCGNNNCAGTNNNGATCGTCGGACTGTAGAACTCTGAACCCCTATAGTGAGTCGTATTACCGGGAGCTT  
83 /5Phos/TCTAGTNNNAGACNNNGATCGTCGGACTGTAGAACTCTGAACCCCTATAGTGAGTCGTATTACCGGGAGCTT  
84 /5Phos/TCCATCANNNTCAGNNNGATCGTCGGACTGTAGAACTCTGAACCCCTATAGTGAGTCGTATTACCGGGAGCTT  
85 /5Phos/TCTCTGNNNGCAGNNNGATCGTCGGACTGTAGAACTCTGAACCCCTATAGTGAGTCGTATTACCGGGAGCTT  
86 /5Phos/TCTATCANNNAGTCNNNGATCGTCGGACTGTAGAACTCTGAACCCCTATAGTGAGTCGTATTACCGGGAGCTT  
87 /5Phos/TCTACGNNNGCCANNNGATCGTCGGACTGTAGAACTCTGAACCCCTATAGTGAGTCGTATTACCGGGAGCTT  
88 /5Phos/TCATCANNNCAGNNNGATCGTCGGACTGTAGAACTCTGAACCCCTATAGTGAGTCGTATTACCGGGAGCTT  
89 /5Phos/TCTTAGNNNGTGCNNNGATCGTCGGACTGTAGAACTCTGAACCCCTATAGTGAGTCGTATTACCGGGAGCTT  
90 /5Phos/TCCAGCANNNTAATNNNGATCGTCGGACTGTAGAACTCTGAACCCCTATAGTGAGTCGTATTACCGGGAGCTT  
91 /5Phos/TCCAGANNNTTGNNGGATCGTCGGACTGTAGAACTCTGAACCCCTATAGTGAGTCGTATTACCGGGAGCTT  
92 /5Phos/TCTTAGNNNTGCGNNNGATCGTCGGACTGTAGAACTCTGAACCCCTATAGTGAGTCGTATTACCGGGAGCTT  
93 /5Phos/TCATGCNNNCAACNNNGATCGTCGGACTGTAGAACTCTGAACCCCTATAGTGAGTCGTATTACCGGGAGCTT  
94 /5Phos/TCTACANNNCGCTNNNGATCGTCGGACTGTAGAACTCTGAACCCCTATAGTGAGTCGTATTACCGGGAGCTT  
95 /5Phos/TCCTCANNNCAGANNNGATCGTCGGACTGTAGAACTCTGAACCCCTATAGTGAGTCGTATTACCGGGAGCTT  
96 /5Phos/TCTCTCANNNTAGTNNNGATCGTCGGACTGTAGAACTCTGAACCCCTATAGTGAGTCGTATTACCGGGAGCTT  
97 /5Phos/TCTCGCANNNGTCTNNNGATCGTCGGACTGTAGAACTCTGAACCCCTATAGTGAGTCGTATTACCGGGAGCTT  
98 /5Phos/TCCTACNNNTGGTNNNGATCGTCGGACTGTAGAACTCTGAACCCCTATAGTGAGTCGTATTACCGGGAGCTT  
99 /5Phos/TCTCCGNNNATTANNNGATCGTCGGACTGTAGAACTCTGAACCCCTATAGTGAGTCGTATTACCGGGAGCTT  
100 /5Phos/TCGCAGNNNTCAGNNNGATCGTCGGACTGTAGAACTCTGAACCCCTATAGTGAGTCGTATTACCGGGAGCTT  
101 /5Phos/TCGTAGNNNAGATNNNGATCGTCGGACTGTAGAACTCTGAACCCCTATAGTGAGTCGTATTACCGGGAGCTT  
102 /5Phos/TCCAAGNNNTCCTNNNGATCGTCGGACTGTAGAACTCTGAACCCCTATAGTGAGTCGTATTACCGGGAGCTT  
103 /5Phos/TCCAGANNNCATNNNGATCGTCGGACTGTAGAACTCTGAACCCCTATAGTGAGTCGTATTACCGGGAGCTT  
104 /5Phos/TCGCACNNNACAGANNNGATCGTCGGACTGTAGAACTCTGAACCCCTATAGTGAGTCGTATTACCGGGAGCTT  
105 /5Phos/TCGTGCNNNAGTANNNGATCGTCGGACTGTAGAACTCTGAACCCCTATAGTGAGTCGTATTACCGGGAGCTT  
106 /5Phos/TCCAACNNNTATGNNNGATCGTCGGACTGTAGAACTCTGAACCCCTATAGTGAGTCGTATTACCGGGAGCTT  
107 /5Phos/TCAGANNNGTCTNNNGATCGTCGGACTGTAGAACTCTGAACCCCTATAGTGAGTCGTATTACCGGGAGCTT  
108 /5Phos/TCAATCANNNTACGNNNGATCGTCGGACTGTAGAACTCTGAACCCCTATAGTGAGTCGTATTACCGGGAGCTT  
109 /5Phos/TCTCATNNNTCGTNNNGATCGTCGGACTGTAGAACTCTGAACCCCTATAGTGAGTCGTATTACCGGGAGCTT  
110 /5Phos/TCAGANNNGTCAANNNGATCGTCGGACTGTAGAACTCTGAACCCCTATAGTGAGTCGTATTACCGGGAGCTT  
111 /5Phos/TCGAACNNNTGANNNNGATCGTCGGACTGTAGAACTCTGAACCCCTATAGTGAGTCGTATTACCGGGAGCTT  
112 /5Phos/TCGCATNNNGCCANNNGATCGTCGGACTGTAGAACTCTGAACCCCTATAGTGAGTCGTATTACCGGGAGCTT  
113 /5Phos/TCGACANNNGCCTNNNGATCGTCGGACTGTAGAACTCTGAACCCCTATAGTGAGTCGTATTACCGGGAGCTT  
114 /5Phos/TCCATCANNNAGCANNNGATCGTCGGACTGTAGAACTCTGAACCCCTATAGTGAGTCGTATTACCGGGAGCTT  
115 /5Phos/TCAGCANNNTCGTNNNGATCGTCGGACTGTAGAACTCTGAACCCCTATAGTGAGTCGTATTACCGGGAGCTT  
116 /5Phos/TCTGCTNNNAGATNNNGATCGTCGGACTGTAGAACTCTGAACCCCTATAGTGAGTCGTATTACCGGGAGCTT  
117 /5Phos/TCAGANNNTGCGNNNGATCGTCGGACTGTAGAACTCTGAACCCCTATAGTGAGTCGTATTACCGGGAGCTT  
118 /5Phos/TCCATANNNGTGNNGGATCGTCGGACTGTAGAACTCTGAACCCCTATAGTGAGTCGTATTACCGGGAGCTT  
119 /5Phos/TCCAGANNNACGTTNNNGATCGTCGGACTGTAGAACTCTGAACCCCTATAGTGAGTCGTATTACCGGGAGCTT  
120 /5Phos/TCGACGNNNCATCNNGGATCGTCGGACTGTAGAACTCTGAACCCCTATAGTGAGTCGTATTACCGGGAGCTT  
121 /5Phos/TCTAGANNNTACNNNGATCGTCGGACTGTAGAACTCTGAACCCCTATAGTGAGTCGTATTACCGGGAGCTT

122 /5Phos/TCTCCTNNNACGANNNGATCGTCGGACTGTAGAACTCTGAACCCCTATAGTGAGTCGTATTACCGGGAGCTT  
123 /5Phos/TCCATCNNNCGACNNNGATCGTCGGACTGTAGAACTCTGAACCCCTATAGTGAGTCGTATTACCGGGAGCTT  
124 /5Phos/TCTGAGNNNTACANNNGATCGTCGGACTGTAGAACTCTGAACCCCTATAGTGAGTCGTATTACCGGGAGCTT  
125 /5Phos/TCGGCANNNCATGNNGGATCGTCGGACTGTAGAACTCTGAACCCCTATAGTGAGTCGTATTACCGGGAGCTT  
126 /5Phos/TCTAGTNNNTGCTNNNGATCGTCGGACTGTAGAACTCTGAACCCCTATAGTGAGTCGTATTACCGGGAGCTT  
127 /5Phos/TCCACANNNTACGNNNGATCGTCGGACTGTAGAACTCTGAACCCCTATAGTGAGTCGTATTACCGGGAGCTT  
128 /5Phos/TCTAGCANNACAGNNNGATCGTCGGACTGTAGAACTCTGAACCCCTATAGTGAGTCGTATTACCGGGAGCTT  
129 /5Phos/TCTTACNNNAGACNNNGATCGTCGGACTGTAGAACTCTGAACCCCTATAGTGAGTCGTATTACCGGGAGCTT  
130 /5Phos/TCCACTNNNGCGANNNGATCGTCGGACTGTAGAACTCTGAACCCCTATAGTGAGTCGTATTACCGGGAGCTT  
131 /5Phos/TCTGTANNNCACANNNGATCGTCGGACTGTAGAACTCTGAACCCCTATAGTGAGTCGTATTACCGGGAGCTT  
132 /5Phos/TCCGACNNNCAAGNNNGATCGTCGGACTGTAGAACTCTGAACCCCTATAGTGAGTCGTATTACCGGGAGCTT  
133 /5Phos/TCGGCTNNNTGAGNNNGATCGTCGGACTGTAGAACTCTGAACCCCTATAGTGAGTCGTATTACCGGGAGCTT  
134 /5Phos/TCCACANNNAGATNNNGATCGTCGGACTGTAGAACTCTGAACCCCTATAGTGAGTCGTATTACCGGGAGCTT  
135 /5Phos/TCGGACNNNTGTANNNGATCGTCGGACTGTAGAACTCTGAACCCCTATAGTGAGTCGTATTACCGGGAGCTT  
136 /5Phos/TCGGTCNNNCTACNNNGATCGTCGGACTGTAGAACTCTGAACCCCTATAGTGAGTCGTATTACCGGGAGCTT  
137 /5Phos/TCGAAGNNNCGTGNNGGATCGTCGGACTGTAGAACTCTGAACCCCTATAGTGAGTCGTATTACCGGGAGCTT  
138 /5Phos/TCGAATNNNTGACNNNGATCGTCGGACTGTAGAACTCTGAACCCCTATAGTGAGTCGTATTACCGGGAGCTT  
139 /5Phos/TCTGTCNNNCGCTNNNGATCGTCGGACTGTAGAACTCTGAACCCCTATAGTGAGTCGTATTACCGGGAGCTT  
140 /5Phos/TCACGNNNCAACNNNGATCGTCGGACTGTAGAACTCTGAACCCCTATAGTGAGTCGTATTACCGGGAGCTT  
141 /5Phos/TCCATCGNNNATAGNNNGATCGTCGGACTGTAGAACTCTGAACCCCTATAGTGAGTCGTATTACCGGGAGCTT  
142 /5Phos/TCGCCTNNNATCGNNNGATCGTCGGACTGTAGAACTCTGAACCCCTATAGTGAGTCGTATTACCGGGAGCTT  
143 /5Phos/TCACTGNNNCACANNNGATCGTCGGACTGTAGAACTCTGAACCCCTATAGTGAGTCGTATTACCGGGAGCTT  
144 /5Phos/TCGCTANNNATAGNNNGATCGTCGGACTGTAGAACTCTGAACCCCTATAGTGAGTCGTATTACCGGGAGCTT  
145 /5Phos/TCCAATNNNGTCTNNNGATCGTCGGACTGTAGAACTCTGAACCCCTATAGTGAGTCGTATTACCGGGAGCTT  
146 /5Phos/TCCAGCANNNGTACNNNGATCGTCGGACTGTAGAACTCTGAACCCCTATAGTGAGTCGTATTACCGGGAGCTT  
147 /5Phos/TCAGACNNNGCTANNNGATCGTCGGACTGTAGAACTCTGAACCCCTATAGTGAGTCGTATTACCGGGAGCTT  
148 /5Phos/TCACCTNNNGTGANNNGATCGTCGGACTGTAGAACTCTGAACCCCTATAGTGAGTCGTATTACCGGGAGCTT  
149 /5Phos/TCTGTANNNGCCTNNNGATCGTCGGACTGTAGAACTCTGAACCCCTATAGTGAGTCGTATTACCGGGAGCTT  
150 /5Phos/TCAAGCNNNTGACNNNGATCGTCGGACTGTAGAACTCTGAACCCCTATAGTGAGTCGTATTACCGGGAGCTT  
151 /5Phos/TCCTCTNNNTGCANNNGATCGTCGGACTGTAGAACTCTGAACCCCTATAGTGAGTCGTATTACCGGGAGCTT  
152 /5Phos/TCCACGNNNCTCANNNGATCGTCGGACTGTAGAACTCTGAACCCCTATAGTGAGTCGTATTACCGGGAGCTT  
153 /5Phos/TCCGGTNNNCTGANNNGATCGTCGGACTGTAGAACTCTGAACCCCTATAGTGAGTCGTATTACCGGGAGCTT  
154 /5Phos/TCTCTANNNCTGANNNGATCGTCGGACTGTAGAACTCTGAACCCCTATAGTGAGTCGTATTACCGGGAGCTT  
155 /5Phos/TCCTCGNNNGTCANNNGATCGTCGGACTGTAGAACTCTGAACCCCTATAGTGAGTCGTATTACCGGGAGCTT  
156 /5Phos/TCACAGNNNTGCANNNGATCGTCGGACTGTAGAACTCTGAACCCCTATAGTGAGTCGTATTACCGGGAGCTT  
157 /5Phos/TCAACGNNNGTACNNNGATCGTCGGACTGTAGAACTCTGAACCCCTATAGTGAGTCGTATTACCGGGAGCTT  
158 /5Phos/TCGTACNNNAGCANNNGATCGTCGGACTGTAGAACTCTGAACCCCTATAGTGAGTCGTATTACCGGGAGCTT  
159 /5Phos/TCACACNNNCGTANNNGATCGTCGGACTGTAGAACTCTGAACCCCTATAGTGAGTCGTATTACCGGGAGCTT  
160 /5Phos/TCGTTGNNNCTCGNNNGATCGTCGGACTGTAGAACTCTGAACCCCTATAGTGAGTCGTATTACCGGGAGCTT  
161 /5Phos/TCTTGTNNNCAGCANNNGATCGTCGGACTGTAGAACTCTGAACCCCTATAGTGAGTCGTATTACCGGGAGCTT  
162 /5Phos/TCGTTANNNTCCTNNNGATCGTCGGACTGTAGAACTCTGAACCCCTATAGTGAGTCGTATTACCGGGAGCTT  
163 /5Phos/TCGGCANNNTCTCANNNGATCGTCGGACTGTAGAACTCTGAACCCCTATAGTGAGTCGTATTACCGGGAGCTT  
164 /5Phos/TCCAGCANNNTAGANNNGATCGTCGGACTGTAGAACTCTGAACCCCTATAGTGAGTCGTATTACCGGGAGCTT  
165 /5Phos/TCACACNNNCTACNNNGATCGTCGGACTGTAGAACTCTGAACCCCTATAGTGAGTCGTATTACCGGGAGCTT  
166 /5Phos/TCGCGCNNNTAACNNNGATCGTCGGACTGTAGAACTCTGAACCCCTATAGTGAGTCGTATTACCGGGAGCTT  
167 /5Phos/TCTTGANNNCCTGNNNGATCGTCGGACTGTAGAACTCTGAACCCCTATAGTGAGTCGTATTACCGGGAGCTT  
168 /5Phos/TCAGCANNNAGACNNNGATCGTCGGACTGTAGAACTCTGAACCCCTATAGTGAGTCGTATTACCGGGAGCTT  
169 /5Phos/TCGAACNNNTACTNNNGATCGTCGGACTGTAGAACTCTGAACCCCTATAGTGAGTCGTATTACCGGGAGCTT  
170 /5Phos/TCTGGANNNGATANNNGATCGTCGGACTGTAGAACTCTGAACCCCTATAGTGAGTCGTATTACCGGGAGCTT  
171 /5Phos/TCCATCNNNGACTNNNGATCGTCGGACTGTAGAACTCTGAACCCCTATAGTGAGTCGTATTACCGGGAGCTT  
172 /5Phos/TCACGTNNNTGGTNNNGATCGTCGGACTGTAGAACTCTGAACCCCTATAGTGAGTCGTATTACCGGGAGCTT  
173 /5Phos/TCGACTNNNTCTGNNNGATCGTCGGACTGTAGAACTCTGAACCCCTATAGTGAGTCGTATTACCGGGAGCTT  
174 /5Phos/TCGTCANNNAGAGNNNGATCGTCGGACTGTAGAACTCTGAACCCCTATAGTGAGTCGTATTACCGGGAGCTT  
175 /5Phos/TCTTGANNNAGGTNNNGATCGTCGGACTGTAGAACTCTGAACCCCTATAGTGAGTCGTATTACCGGGAGCTT  
176 /5Phos/TCTGANNNCTCANNNGATCGTCGGACTGTAGAACTCTGAACCCCTATAGTGAGTCGTATTACCGGGAGCTT  
177 /5Phos/TCGAAGNNNACCANNNGATCGTCGGACTGTAGAACTCTGAACCCCTATAGTGAGTCGTATTACCGGGAGCTT  
178 /5Phos/TCGATANNNCGGTNNNGATCGTCGGACTGTAGAACTCTGAACCCCTATAGTGAGTCGTATTACCGGGAGCTT  
179 /5Phos/TCGAGCANNNGAGTNNNGATCGTCGGACTGTAGAACTCTGAACCCCTATAGTGAGTCGTATTACCGGGAGCTT  
180 /5Phos/TCCTAGNNNACCANNNGATCGTCGGACTGTAGAACTCTGAACCCCTATAGTGAGTCGTATTACCGGGAGCTT  
181 /5Phos/TCGATGNNNTAACNNNGATCGTCGGACTGTAGAACTCTGAACCCCTATAGTGAGTCGTATTACCGGGAGCTT  
182 /5Phos/TCCAGTANNNGTGTNNNGATCGTCGGACTGTAGAACTCTGAACCCCTATAGTGAGTCGTATTACCGGGAGCTT  
183 /5Phos/TCCTCGNNNCATGNNNGATCGTCGGACTGTAGAACTCTGAACCCCTATAGTGAGTCGTATTACCGGGAGCTT  
184 /5Phos/TCACATNNNCGCANNNGATCGTCGGACTGTAGAACTCTGAACCCCTATAGTGAGTCGTATTACCGGGAGCTT  
185 /5Phos/TCAGCTNNNTCTANNNGATCGTCGGACTGTAGAACTCTGAACCCCTATAGTGAGTCGTATTACCGGGAGCTT  
186 /5Phos/TCCTGTNNNTAACNNNGATCGTCGGACTGTAGAACTCTGAACCCCTATAGTGAGTCGTATTACCGGGAGCTT  
187 /5Phos/TCTTGANNNAGCANNNGATCGTCGGACTGTAGAACTCTGAACCCCTATAGTGAGTCGTATTACCGGGAGCTT  
188 /5Phos/TCTTAGNNNGCATNNNGATCGTCGGACTGTAGAACTCTGAACCCCTATAGTGAGTCGTATTACCGGGAGCTT  
189 /5Phos/TCCTTCNNNATAGNNNGATCGTCGGACTGTAGAACTCTGAACCCCTATAGTGAGTCGTATTACCGGGAGCTT  
190 /5Phos/TCCTACNNNGAATNNNGATCGTCGGACTGTAGAACTCTGAACCCCTATAGTGAGTCGTATTACCGGGAGCTT  
191 /5Phos/TCTTGANNNGACANNNGATCGTCGGACTGTAGAACTCTGAACCCCTATAGTGAGTCGTATTACCGGGAGCTT  
192 /5Phos/TCTACGNNNCACANNNGATCGTCGGACTGTAGAACTCTGAACCCCTATAGTGAGTCGTATTACCGGGAGCTT  
193 /5Phos/TCCGCANNNACAGNNNGATCGTCGGACTGTAGAACTCTGAACCCCTATAGTGAGTCGTATTACCGGGAGCTT  
194 /5Phos/TCGTAGNNNGCATNNNGATCGTCGGACTGTAGAACTCTGAACCCCTATAGTGAGTCGTATTACCGGGAGCTT

195 /5Phos/TCACGCNNNAGAGNNNGATCGTCGGACTGTAGAACTCTGAACCCCTATAGTGAGTCGTATTACCGGGAGCTT  
196 /5Phos/TCGGTGNNTACGNNNGATCGTCGGACTGTAGAACTCTGAACCCCTATAGTGAGTCGTATTACCGGGAGCTT  
197 /5Phos/TCCGCGNNNATTCNNNGATCGTCGGACTGTAGAACTCTGAACCCCTATAGTGAGTCGTATTACCGGGAGCTT  
198 /5Phos/TCGTTANNNGCAGNNNGATCGTCGGACTGTAGAACTCTGAACCCCTATAGTGAGTCGTATTACCGGGAGCTT  
199 /5Phos/TCTGACNNNACCANNNGATCGTCGGACTGTAGAACTCTGAACCCCTATAGTGAGTCGTATTACCGGGAGCTT  
200 /5Phos/TCCTAGNNNTCTCNNNGATCGTCGGACTGTAGAACTCTGAACCCCTATAGTGAGTCGTATTACCGGGAGCTT  
201 /5Phos/TCACATNNNACCTNNNGATCGTCGGACTGTAGAACTCTGAACCCCTATAGTGAGTCGTATTACCGGGAGCTT  
202 /5Phos/TCCAGCNNNACACNNNGATCGTCGGACTGTAGAACTCTGAACCCCTATAGTGAGTCGTATTACCGGGAGCTT  
203 /5Phos/TCCGTANNNTATGNNNGATCGTCGGACTGTAGAACTCTGAACCCCTATAGTGAGTCGTATTACCGGGAGCTT  
204 /5Phos/TCCGGANNNACTANNNGATCGTCGGACTGTAGAACTCTGAACCCCTATAGTGAGTCGTATTACCGGGAGCTT  
205 /5Phos/TCTTCTNNNGCCGNNNGATCGTCGGACTGTAGAACTCTGAACCCCTATAGTGAGTCGTATTACCGGGAGCTT  
206 /5Phos/TCTAAGNNNTGTCNNNGATCGTCGGACTGTAGAACTCTGAACCCCTATAGTGAGTCGTATTACCGGGAGCTT  
207 /5Phos/TCGGATNNNTATCNNNGATCGTCGGACTGTAGAACTCTGAACCCCTATAGTGAGTCGTATTACCGGGAGCTT  
208 /5Phos/TCTAAGNNNACACNNNGATCGTCGGACTGTAGAACTCTGAACCCCTATAGTGAGTCGTATTACCGGGAGCTT  
209 /5Phos/TCGAGANNNTCTCNNNGATCGTCGGACTGTAGAACTCTGAACCCCTATAGTGAGTCGTATTACCGGGAGCTT  
210 /5Phos/TCCATGNNNACGANNNGATCGTCGGACTGTAGAACTCTGAACCCCTATAGTGAGTCGTATTACCGGGAGCTT  
211 /5Phos/TCCTGANNNGAGCNNNGATCGTCGGACTGTAGAACTCTGAACCCCTATAGTGAGTCGTATTACCGGGAGCTT  
212 /5Phos/TCTGTNNNTAAGNNNGATCGTCGGACTGTAGAACTCTGAACCCCTATAGTGAGTCGTATTACCGGGAGCTT  
213 /5Phos/TCAGCAGNNNACGANNNGATCGTCGGACTGTAGAACTCTGAACCCCTATAGTGAGTCGTATTACCGGGAGCTT  
214 /5Phos/TCACANNNATCGNNNGATCGTCGGACTGTAGAACTCTGAACCCCTATAGTGAGTCGTATTACCGGGAGCTT  
215 /5Phos/TCTGATNNNGTCANNNGATCGTCGGACTGTAGAACTCTGAACCCCTATAGTGAGTCGTATTACCGGGAGCTT  
216 /5Phos/TCGTTGNNNGAGTNNNGATCGTCGGACTGTAGAACTCTGAACCCCTATAGTGAGTCGTATTACCGGGAGCTT  
217 /5Phos/TCAAGANNNTGANNNGATCGTCGGACTGTAGAACTCTGAACCCCTATAGTGAGTCGTATTACCGGGAGCTT  
218 /5Phos/TCAACGNNNAGTNNNGATCGTCGGACTGTAGAACTCTGAACCCCTATAGTGAGTCGTATTACCGGGAGCTT  
219 /5Phos/TCGAGCANNNACGANNNGATCGTCGGACTGTAGAACTCTGAACCCCTATAGTGAGTCGTATTACCGGGAGCTT  
220 /5Phos/TCAGCANNNAGTANNNGATCGTCGGACTGTAGAACTCTGAACCCCTATAGTGAGTCGTATTACCGGGAGCTT  
221 /5Phos/TCCTCANNNATTGNNNGATCGTCGGACTGTAGAACTCTGAACCCCTATAGTGAGTCGTATTACCGGGAGCTT  
222 /5Phos/TCATCANNNGCCANNNGATCGTCGGACTGTAGAACTCTGAACCCCTATAGTGAGTCGTATTACCGGGAGCTT  
223 /5Phos/TCGAAGNNNGCGTNNNGATCGTCGGACTGTAGAACTCTGAACCCCTATAGTGAGTCGTATTACCGGGAGCTT  
224 /5Phos/TCGACTNNNACGANNNGATCGTCGGACTGTAGAACTCTGAACCCCTATAGTGAGTCGTATTACCGGGAGCTT  
225 /5Phos/TCGCGTNNNTATGANNNGATCGTCGGACTGTAGAACTCTGAACCCCTATAGTGAGTCGTATTACCGGGAGCTT  
226 /5Phos/TCGAAGNNNGACGNNNGATCGTCGGACTGTAGAACTCTGAACCCCTATAGTGAGTCGTATTACCGGGAGCTT  
227 /5Phos/TCGAATNNNCGCANNNGATCGTCGGACTGTAGAACTCTGAACCCCTATAGTGAGTCGTATTACCGGGAGCTT  
228 /5Phos/TCGCGTNNNTGTGNNNGATCGTCGGACTGTAGAACTCTGAACCCCTATAGTGAGTCGTATTACCGGGAGCTT  
229 /5Phos/TCCTGNNNTACTNNNGATCGTCGGACTGTAGAACTCTGAACCCCTATAGTGAGTCGTATTACCGGGAGCTT  
230 /5Phos/TCATGNNNTCCANNNGATCGTCGGACTGTAGAACTCTGAACCCCTATAGTGAGTCGTATTACCGGGAGCTT  
231 /5Phos/TCACGCNNNAGANNNGATCGTCGGACTGTAGAACTCTGAACCCCTATAGTGAGTCGTATTACCGGGAGCTT  
232 /5Phos/TCATTNNNACGNNNGATCGTCGGACTGTAGAACTCTGAACCCCTATAGTGAGTCGTATTACCGGGAGCTT  
233 /5Phos/TCGTANNNTATCNNNGATCGTCGGACTGTAGAACTCTGAACCCCTATAGTGAGTCGTATTACCGGGAGCTT  
234 /5Phos/TCGCTCNNNTGTGNNNGATCGTCGGACTGTAGAACTCTGAACCCCTATAGTGAGTCGTATTACCGGGAGCTT  
235 /5Phos/TCATCANNNTGANNNGATCGTCGGACTGTAGAACTCTGAACCCCTATAGTGAGTCGTATTACCGGGAGCTT  
236 /5Phos/TCGGTNNNTGANNNGATCGTCGGACTGTAGAACTCTGAACCCCTATAGTGAGTCGTATTACCGGGAGCTT  
237 /5Phos/TCAGCANNNACGANNNGATCGTCGGACTGTAGAACTCTGAACCCCTATAGTGAGTCGTATTACCGGGAGCTT  
238 /5Phos/TCAGTNNNCTGANNNGATCGTCGGACTGTAGAACTCTGAACCCCTATAGTGAGTCGTATTACCGGGAGCTT  
239 /5Phos/TCAACTNNNAGAGNNNGATCGTCGGACTGTAGAACTCTGAACCCCTATAGTGAGTCGTATTACCGGGAGCTT  
240 /5Phos/TCTCATNNNTACGNNNGATCGTCGGACTGTAGAACTCTGAACCCCTATAGTGAGTCGTATTACCGGGAGCTT  
241 /5Phos/TCTGCGNNNTCANNNGATCGTCGGACTGTAGAACTCTGAACCCCTATAGTGAGTCGTATTACCGGGAGCTT  
242 /5Phos/TCGGAGNNNATTGNNNGATCGTCGGACTGTAGAACTCTGAACCCCTATAGTGAGTCGTATTACCGGGAGCTT  
243 /5Phos/TCTGCGNNNGTANNNGATCGTCGGACTGTAGAACTCTGAACCCCTATAGTGAGTCGTATTACCGGGAGCTT  
244 /5Phos/TCTGTGNNNGAATNNNGATCGTCGGACTGTAGAACTCTGAACCCCTATAGTGAGTCGTATTACCGGGAGCTT  
245 /5Phos/TCTTATNNNCGGNNNGATCGTCGGACTGTAGAACTCTGAACCCCTATAGTGAGTCGTATTACCGGGAGCTT  
246 /5Phos/TCCGGANNNTCATNNNGATCGTCGGACTGTAGAACTCTGAACCCCTATAGTGAGTCGTATTACCGGGAGCTT  
247 /5Phos/TCTCTCANNNAGCANNNGATCGTCGGACTGTAGAACTCTGAACCCCTATAGTGAGTCGTATTACCGGGAGCTT  
248 /5Phos/TCGTTNNNCAATNNNGATCGTCGGACTGTAGAACTCTGAACCCCTATAGTGAGTCGTATTACCGGGAGCTT  
249 /5Phos/TCGTCNNNACGANNNGATCGTCGGACTGTAGAACTCTGAACCCCTATAGTGAGTCGTATTACCGGGAGCTT  
250 /5Phos/TCGTATNNNACGNNNGATCGTCGGACTGTAGAACTCTGAACCCCTATAGTGAGTCGTATTACCGGGAGCTT  
251 /5Phos/TCTCAGNNNGATANNNGATCGTCGGACTGTAGAACTCTGAACCCCTATAGTGAGTCGTATTACCGGGAGCTT  
252 /5Phos/TCAAGTNNNTAGCANNNGATCGTCGGACTGTAGAACTCTGAACCCCTATAGTGAGTCGTATTACCGGGAGCTT  
253 /5Phos/TCAGTNNNCTAGNNNGATCGTCGGACTGTAGAACTCTGAACCCCTATAGTGAGTCGTATTACCGGGAGCTT  
254 /5Phos/TCATGTNNNGTANNNGATCGTCGGACTGTAGAACTCTGAACCCCTATAGTGAGTCGTATTACCGGGAGCTT  
255 /5Phos/TCAGTNNNCTACNNNGATCGTCGGACTGTAGAACTCTGAACCCCTATAGTGAGTCGTATTACCGGGAGCTT  
256 /5Phos/TCCTCANNNTACNNNGATCGTCGGACTGTAGAACTCTGAACCCCTATAGTGAGTCGTATTACCGGGAGCTT  
257 /5Phos/TCATCANNNTCTGNNNGATCGTCGGACTGTAGAACTCTGAACCCCTATAGTGAGTCGTATTACCGGGAGCTT  
258 /5Phos/TCGTCANNNACGANNNGATCGTCGGACTGTAGAACTCTGAACCCCTATAGTGAGTCGTATTACCGGGAGCTT  
259 /5Phos/TCGTTANNNGCANNNGATCGTCGGACTGTAGAACTCTGAACCCCTATAGTGAGTCGTATTACCGGGAGCTT  
260 /5Phos/TCGAGANNNCGANNNGATCGTCGGACTGTAGAACTCTGAACCCCTATAGTGAGTCGTATTACCGGGAGCTT  
261 /5Phos/TCTGTNNNAGTANNNGATCGTCGGACTGTAGAACTCTGAACCCCTATAGTGAGTCGTATTACCGGGAGCTT  
262 /5Phos/TCACGCNNNACTANNNGATCGTCGGACTGTAGAACTCTGAACCCCTATAGTGAGTCGTATTACCGGGAGCTT  
263 /5Phos/TCTGATNNNGATGNNNGATCGTCGGACTGTAGAACTCTGAACCCCTATAGTGAGTCGTATTACCGGGAGCTT  
264 /5Phos/TCGCATNNNGAATNNNGATCGTCGGACTGTAGAACTCTGAACCCCTATAGTGAGTCGTATTACCGGGAGCTT  
265 /5Phos/TCGTTGNNNTGANNNGATCGTCGGACTGTAGAACTCTGAACCCCTATAGTGAGTCGTATTACCGGGAGCTT  
266 /5Phos/TCCAATNNNGAACNNNGATCGTCGGACTGTAGAACTCTGAACCCCTATAGTGAGTCGTATTACCGGGAGCTT  
267 /5Phos/TCCGACNNNCTCANNNGATCGTCGGACTGTAGAACTCTGAACCCCTATAGTGAGTCGTATTACCGGGAGCTT

268 /5Phos/TC TTCANNACCTNNNGATCGTCGGACTGTAGA ACTCTGAACCCCTATAGTGAGTCGTATTACCGGGAGCTT  
269 /5Phos/TCCGGC NNNATATNNNGATCGTCGGACTGTAGA ACTCTGAACCCCTATAGTGAGTCGTATTACCGGGAGCTT  
270 /5Phos/TCGTATNNNACGTNNNGATCGTCGGACTGTAGA ACTCTGAACCCCTATAGTGAGTCGTATTACCGGGAGCTT  
271 /5Phos/TCGGTCNNNTCCANNNGATCGTCGGACTGTAGA ACTCTGAACCCCTATAGTGAGTCGTATTACCGGGAGCTT  
272 /5Phos/TCGCCTNNNTGGANNNGATCGTCGGACTGTAGA ACTCTGAACCCCTATAGTGAGTCGTATTACCGGGAGCTT  
273 /5Phos/TCTGGTNNNTGTCNNNGATCGTCGGACTGTAGA ACTCTGAACCCCTATAGTGAGTCGTATTACCGGGAGCTT  
274 /5Phos/TCGCCTNNNCATNNNGATCGTCGGACTGTAGA ACTCTGAACCCCTATAGTGAGTCGTATTACCGGGAGCTT  
275 /5Phos/TCAGACNNNCTGTNNNGATCGTCGGACTGTAGA ACTCTGAACCCCTATAGTGAGTCGTATTACCGGGAGCTT  
276 /5Phos/TCATGANNNGACGNNNGATCGTCGGACTGTAGA ACTCTGAACCCCTATAGTGAGTCGTATTACCGGGAGCTT  
277 /5Phos/TCGC GANNNCACANNNGATCGTCGGACTGTAGA ACTCTGAACCCCTATAGTGAGTCGTATTACCGGGAGCTT  
278 /5Phos/TCGCATNNNCATANNNGATCGTCGGACTGTAGA ACTCTGAACCCCTATAGTGAGTCGTATTACCGGGAGCTT  
279 /5Phos/TCTCTANNNACGTNNNGATCGTCGGACTGTAGA ACTCTGAACCCCTATAGTGAGTCGTATTACCGGGAGCTT  
280 /5Phos/TCGACTNNNCTAGNNNGATCGTCGGACTGTAGA ACTCTGAACCCCTATAGTGAGTCGTATTACCGGGAGCTT  
281 /5Phos/TCTGGTNNNAGCANNNGATCGTCGGACTGTAGA ACTCTGAACCCCTATAGTGAGTCGTATTACCGGGAGCTT  
282 /5Phos/TCTAATNNNACGNNNGATCGTCGGACTGTAGA ACTCTGAACCCCTATAGTGAGTCGTATTACCGGGAGCTT  
283 /5Phos/TCTCACNNNACATNNNGATCGTCGGACTGTAGA ACTCTGAACCCCTATAGTGAGTCGTATTACCGGGAGCTT  
284 /5Phos/TCACGANNNGCAGNNNGATCGTCGGACTGTAGA ACTCTGAACCCCTATAGTGAGTCGTATTACCGGGAGCTT  
285 /5Phos/TCTATGNNNGTGTNNNGATCGTCGGACTGTAGA ACTCTGAACCCCTATAGTGAGTCGTATTACCGGGAGCTT  
286 /5Phos/TCGTCANNNTAGTNNNGATCGTCGGACTGTAGA ACTCTGAACCCCTATAGTGAGTCGTATTACCGGGAGCTT  
287 /5Phos/TC TTGTNNNTGAGNNNGATCGTCGGACTGTAGA ACTCTGAACCCCTATAGTGAGTCGTATTACCGGGAGCTT  
288 /5Phos/TCAAGC NNNGTTANNNGATCGTCGGACTGTAGA ACTCTGAACCCCTATAGTGAGTCGTATTACCGGGAGCTT  
289 /5Phos/TCGTGANNNATCGNNNGATCGTCGGACTGTAGA ACTCTGAACCCCTATAGTGAGTCGTATTACCGGGAGCTT  
290 /5Phos/TCCACANNNCTTANNNGATCGTCGGACTGTAGA ACTCTGAACCCCTATAGTGAGTCGTATTACCGGGAGCTT  
291 /5Phos/TCGCACNNNCAGTNNNGATCGTCGGACTGTAGA ACTCTGAACCCCTATAGTGAGTCGTATTACCGGGAGCTT  
292 /5Phos/TCTGGTNNNCTAGNNNGATCGTCGGACTGTAGA ACTCTGAACCCCTATAGTGAGTCGTATTACCGGGAGCTT  
293 /5Phos/TCTGGANNNTACGNNNGATCGTCGGACTGTAGA ACTCTGAACCCCTATAGTGAGTCGTATTACCGGGAGCTT  
294 /5Phos/TCGCCGNNNTATANNNGATCGTCGGACTGTAGA ACTCTGAACCCCTATAGTGAGTCGTATTACCGGGAGCTT  
295 /5Phos/TCGTCTNNNCTTCNNNGATCGTCGGACTGTAGA ACTCTGAACCCCTATAGTGAGTCGTATTACCGGGAGCTT  
296 /5Phos/TCAAGANNNAGCANNNGATCGTCGGACTGTAGA ACTCTGAACCCCTATAGTGAGTCGTATTACCGGGAGCTT  
297 /5Phos/TCATAGNNNGACANNNGATCGTCGGACTGTAGA ACTCTGAACCCCTATAGTGAGTCGTATTACCGGGAGCTT  
298 /5Phos/TCAGC NNNAGANNNGATCGTCGGACTGTAGA ACTCTGAACCCCTATAGTGAGTCGTATTACCGGGAGCTT  
299 /5Phos/TCTGCTNNNCTTANNNGATCGTCGGACTGTAGA ACTCTGAACCCCTATAGTGAGTCGTATTACCGGGAGCTT  
300 /5Phos/TCTAAGNNNCAGTNNNGATCGTCGGACTGTAGA ACTCTGAACCCCTATAGTGAGTCGTATTACCGGGAGCTT  
301 /5Phos/TCTTACNNNCTCGANNNGATCGTCGGACTGTAGA ACTCTGAACCCCTATAGTGAGTCGTATTACCGGGAGCTT  
302 /5Phos/TCATACNNNAGCANNNGATCGTCGGACTGTAGA ACTCTGAACCCCTATAGTGAGTCGTATTACCGGGAGCTT  
303 /5Phos/TCCGATNNNCTCCANNNGATCGTCGGACTGTAGA ACTCTGAACCCCTATAGTGAGTCGTATTACCGGGAGCTT  
304 /5Phos/TCGTCANNNAGANNNGATCGTCGGACTGTAGA ACTCTGAACCCCTATAGTGAGTCGTATTACCGGGAGCTT  
305 /5Phos/TCTTCTNNNAGANNNGATCGTCGGACTGTAGA ACTCTGAACCCCTATAGTGAGTCGTATTACCGGGAGCTT  
306 /5Phos/TCAGTCNNNTAGANNNGATCGTCGGACTGTAGA ACTCTGAACCCCTATAGTGAGTCGTATTACCGGGAGCTT  
307 /5Phos/TCATGCNNNCTTGNNGATCGTCGGACTGTAGA ACTCTGAACCCCTATAGTGAGTCGTATTACCGGGAGCTT  
308 /5Phos/TCAGGANNNTGAGNNNGATCGTCGGACTGTAGA ACTCTGAACCCCTATAGTGAGTCGTATTACCGGGAGCTT  
309 /5Phos/TCGCAGNNNCAAGNNNGATCGTCGGACTGTAGA ACTCTGAACCCCTATAGTGAGTCGTATTACCGGGAGCTT  
310 /5Phos/TCGACNNNAGANNNGATCGTCGGACTGTAGA ACTCTGAACCCCTATAGTGAGTCGTATTACCGGGAGCTT  
311 /5Phos/TCCTGTNNNACGANNNGATCGTCGGACTGTAGA ACTCTGAACCCCTATAGTGAGTCGTATTACCGGGAGCTT  
312 /5Phos/TCTCACNNNGAACNNNGATCGTCGGACTGTAGA ACTCTGAACCCCTATAGTGAGTCGTATTACCGGGAGCTT  
313 /5Phos/TCGC GANNNGATGNNNGATCGTCGGACTGTAGA ACTCTGAACCCCTATAGTGAGTCGTATTACCGGGAGCTT  
314 /5Phos/TCGGTGNNNAGANNNGATCGTCGGACTGTAGA ACTCTGAACCCCTATAGTGAGTCGTATTACCGGGAGCTT  
315 /5Phos/TCGC GCNNNCTATNNNGATCGTCGGACTGTAGA ACTCTGAACCCCTATAGTGAGTCGTATTACCGGGAGCTT  
316 /5Phos/TCGCATNNNAGANNNGATCGTCGGACTGTAGA ACTCTGAACCCCTATAGTGAGTCGTATTACCGGGAGCTT  
317 /5Phos/TCGAACNNNGCAGNNNGATCGTCGGACTGTAGA ACTCTGAACCCCTATAGTGAGTCGTATTACCGGGAGCTT  
318 /5Phos/TCATGTNNNCGANNNGATCGTCGGACTGTAGA ACTCTGAACCCCTATAGTGAGTCGTATTACCGGGAGCTT  
319 /5Phos/TCTCGC NNNCTCAGNNNGATCGTCGGACTGTAGA ACTCTGAACCCCTATAGTGAGTCGTATTACCGGGAGCTT  
320 /5Phos/TCTCGANNNCAACNNNGATCGTCGGACTGTAGA ACTCTGAACCCCTATAGTGAGTCGTATTACCGGGAGCTT  
321 /5Phos/TCAGC GNNNACTGNNNGATCGTCGGACTGTAGA ACTCTGAACCCCTATAGTGAGTCGTATTACCGGGAGCTT  
322 /5Phos/TCGACNNNAGTNNNGATCGTCGGACTGTAGA ACTCTGAACCCCTATAGTGAGTCGTATTACCGGGAGCTT  
323 /5Phos/TCCGGANNNTAGANNNGATCGTCGGACTGTAGA ACTCTGAACCCCTATAGTGAGTCGTATTACCGGGAGCTT  
324 /5Phos/TCAGCANNNGCATNNNGATCGTCGGACTGTAGA ACTCTGAACCCCTATAGTGAGTCGTATTACCGGGAGCTT  
325 /5Phos/TCGGCANNNATACNNNGATCGTCGGACTGTAGA ACTCTGAACCCCTATAGTGAGTCGTATTACCGGGAGCTT  
326 /5Phos/TCAATGNNNAGANNNGATCGTCGGACTGTAGA ACTCTGAACCCCTATAGTGAGTCGTATTACCGGGAGCTT  
327 /5Phos/TCCGTANNNGCANNNGATCGTCGGACTGTAGA ACTCTGAACCCCTATAGTGAGTCGTATTACCGGGAGCTT  
328 /5Phos/TCACACNNNTGATNNNGATCGTCGGACTGTAGA ACTCTGAACCCCTATAGTGAGTCGTATTACCGGGAGCTT  
329 /5Phos/TCTGAGNNNCAACNNNGATCGTCGGACTGTAGA ACTCTGAACCCCTATAGTGAGTCGTATTACCGGGAGCTT  
330 /5Phos/TCAGTANNNCAACNNNGATCGTCGGACTGTAGA ACTCTGAACCCCTATAGTGAGTCGTATTACCGGGAGCTT  
331 /5Phos/TCTGACNNNCGTCNNNGATCGTCGGACTGTAGA ACTCTGAACCCCTATAGTGAGTCGTATTACCGGGAGCTT  
332 /5Phos/TCTCAGNNNAGANNNGATCGTCGGACTGTAGA ACTCTGAACCCCTATAGTGAGTCGTATTACCGGGAGCTT  
333 /5Phos/TCGGCTNNNACANNNGATCGTCGGACTGTAGA ACTCTGAACCCCTATAGTGAGTCGTATTACCGGGAGCTT  
334 /5Phos/TCTGGC NNNGCATNNNGATCGTCGGACTGTAGA ACTCTGAACCCCTATAGTGAGTCGTATTACCGGGAGCTT  
335 /5Phos/TCTAATNNNCGC NNNGATCGTCGGACTGTAGA ACTCTGAACCCCTATAGTGAGTCGTATTACCGGGAGCTT  
336 /5Phos/TCACTANNNGACTNNNGATCGTCGGACTGTAGA ACTCTGAACCCCTATAGTGAGTCGTATTACCGGGAGCTT  
337 /5Phos/TCCAGTNNNATAGNNNGATCGTCGGACTGTAGA ACTCTGAACCCCTATAGTGAGTCGTATTACCGGGAGCTT  
338 /5Phos/TCCGAGNNNAGCANNNGATCGTCGGACTGTAGA ACTCTGAACCCCTATAGTGAGTCGTATTACCGGGAGCTT  
339 /5Phos/TCTAAGNNNAGCTNNNGATCGTCGGACTGTAGA ACTCTGAACCCCTATAGTGAGTCGTATTACCGGGAGCTT  
340 /5Phos/TCTAGC NNNACGANNNGATCGTCGGACTGTAGA ACTCTGAACCCCTATAGTGAGTCGTATTACCGGGAGCTT

341 /5Phos/TCGGACNNNCGATNNNGATCGTCGGACTGTAGAACTCTGAACCCCTATAGTGAGTCGTATTACCGGGAGCTT  
342 /5Phos/TCATACNNNGATCANNNGATCGTCGGACTGTAGAACTCTGAACCCCTATAGTGAGTCGTATTACCGGGAGCTT  
343 /5Phos/TCTCACNNNCGAGNNNGATCGTCGGACTGTAGAACTCTGAACCCCTATAGTGAGTCGTATTACCGGGAGCTT  
344 /5Phos/TCGCACNNNATCTNNNGATCGTCGGACTGTAGAACTCTGAACCCCTATAGTGAGTCGTATTACCGGGAGCTT  
345 /5Phos/TCGGCANNNACANNNGATCGTCGGACTGTAGAACTCTGAACCCCTATAGTGAGTCGTATTACCGGGAGCTT  
346 /5Phos/TCACACNNNATTGNNNGATCGTCGGACTGTAGAACTCTGAACCCCTATAGTGAGTCGTATTACCGGGAGCTT  
347 /5Phos/TCTCTANNNCGCGNNNGATCGTCGGACTGTAGAACTCTGAACCCCTATAGTGAGTCGTATTACCGGGAGCTT  
348 /5Phos/TCCTTANNNCACGNNNGATCGTCGGACTGTAGAACTCTGAACCCCTATAGTGAGTCGTATTACCGGGAGCTT  
349 /5Phos/TCGATCNNNCACANNNGATCGTCGGACTGTAGAACTCTGAACCCCTATAGTGAGTCGTATTACCGGGAGCTT  
350 /5Phos/TCAGTANNNACCANNNGATCGTCGGACTGTAGAACTCTGAACCCCTATAGTGAGTCGTATTACCGGGAGCTT  
351 /5Phos/TCTGATNNNTACNNNGATCGTCGGACTGTAGAACTCTGAACCCCTATAGTGAGTCGTATTACCGGGAGCTT  
352 /5Phos/TCAGCANNNTGGTNNNGATCGTCGGACTGTAGAACTCTGAACCCCTATAGTGAGTCGTATTACCGGGAGCTT  
353 /5Phos/TCCAACNNNTCGCNNNGATCGTCGGACTGTAGAACTCTGAACCCCTATAGTGAGTCGTATTACCGGGAGCTT  
354 /5Phos/TCTCCTNNNCTGCNNNGATCGTCGGACTGTAGAACTCTGAACCCCTATAGTGAGTCGTATTACCGGGAGCTT  
355 /5Phos/TCAGAGNNNGCACNNNGATCGTCGGACTGTAGAACTCTGAACCCCTATAGTGAGTCGTATTACCGGGAGCTT  
356 /5Phos/TCGAAGNNNAGGCNNNGATCGTCGGACTGTAGAACTCTGAACCCCTATAGTGAGTCGTATTACCGGGAGCTT  
357 /5Phos/TCCTTANNNACTCANNNGATCGTCGGACTGTAGAACTCTGAACCCCTATAGTGAGTCGTATTACCGGGAGCTT  
358 /5Phos/TCAGTCNNNGCAGNNNGATCGTCGGACTGTAGAACTCTGAACCCCTATAGTGAGTCGTATTACCGGGAGCTT  
359 /5Phos/TCTAGNNNTAAGNNNGATCGTCGGACTGTAGAACTCTGAACCCCTATAGTGAGTCGTATTACCGGGAGCTT  
360 /5Phos/TCGCGANNNACANNNGATCGTCGGACTGTAGAACTCTGAACCCCTATAGTGAGTCGTATTACCGGGAGCTT  
361 /5Phos/TCTTCGNNNAGCANNNGATCGTCGGACTGTAGAACTCTGAACCCCTATAGTGAGTCGTATTACCGGGAGCTT  
362 /5Phos/TCGTGTNNNGCACNNNGATCGTCGGACTGTAGAACTCTGAACCCCTATAGTGAGTCGTATTACCGGGAGCTT  
363 /5Phos/TCGAACNNNCAANNNGATCGTCGGACTGTAGAACTCTGAACCCCTATAGTGAGTCGTATTACCGGGAGCTT  
364 /5Phos/TCAGCANNNGAGANNNGATCGTCGGACTGTAGAACTCTGAACCCCTATAGTGAGTCGTATTACCGGGAGCTT  
365 /5Phos/TCACTCNNNCAAGNNNGATCGTCGGACTGTAGAACTCTGAACCCCTATAGTGAGTCGTATTACCGGGAGCTT  
366 /5Phos/TCGTCGNNNCACANNNGATCGTCGGACTGTAGAACTCTGAACCCCTATAGTGAGTCGTATTACCGGGAGCTT  
367 /5Phos/TCCAACNNNCTATNNNGATCGTCGGACTGTAGAACTCTGAACCCCTATAGTGAGTCGTATTACCGGGAGCTT  
368 /5Phos/TCCATGNNNATACNNNGATCGTCGGACTGTAGAACTCTGAACCCCTATAGTGAGTCGTATTACCGGGAGCTT  
369 /5Phos/TCCTGCNNNGCTANNNGATCGTCGGACTGTAGAACTCTGAACCCCTATAGTGAGTCGTATTACCGGGAGCTT  
370 /5Phos/TCATACNNNCAGANNNGATCGTCGGACTGTAGAACTCTGAACCCCTATAGTGAGTCGTATTACCGGGAGCTT  
371 /5Phos/TCCATANNNGCACNNNGATCGTCGGACTGTAGAACTCTGAACCCCTATAGTGAGTCGTATTACCGGGAGCTT  
372 /5Phos/TCCGAGNNNGATCANNNGATCGTCGGACTGTAGAACTCTGAACCCCTATAGTGAGTCGTATTACCGGGAGCTT  
373 /5Phos/TCACTCNNNGCCANNNGATCGTCGGACTGTAGAACTCTGAACCCCTATAGTGAGTCGTATTACCGGGAGCTT  
374 /5Phos/TCAACGNNNTCCGNNNGATCGTCGGACTGTAGAACTCTGAACCCCTATAGTGAGTCGTATTACCGGGAGCTT  
375 /5Phos/TCTACANNNACTGNNNGATCGTCGGACTGTAGAACTCTGAACCCCTATAGTGAGTCGTATTACCGGGAGCTT  
376 /5Phos/TCTACANNNGAAGNNNGATCGTCGGACTGTAGAACTCTGAACCCCTATAGTGAGTCGTATTACCGGGAGCTT  
377 /5Phos/TCGTGCNNNCTCANNNGATCGTCGGACTGTAGAACTCTGAACCCCTATAGTGAGTCGTATTACCGGGAGCTT  
378 /5Phos/TCGTAGNNNGAACNNNGATCGTCGGACTGTAGAACTCTGAACCCCTATAGTGAGTCGTATTACCGGGAGCTT  
379 /5Phos/TCCTCANNNTCGCNNNGATCGTCGGACTGTAGAACTCTGAACCCCTATAGTGAGTCGTATTACCGGGAGCTT  
380 /5Phos/TCTGTANNNACACNNNGATCGTCGGACTGTAGAACTCTGAACCCCTATAGTGAGTCGTATTACCGGGAGCTT  
381 /5Phos/TCACTCNNNCTCTNNNGATCGTCGGACTGTAGAACTCTGAACCCCTATAGTGAGTCGTATTACCGGGAGCTT  
382 /5Phos/TCATGANNNACGCNNNGATCGTCGGACTGTAGAACTCTGAACCCCTATAGTGAGTCGTATTACCGGGAGCTT  
383 /5Phos/TCTCCTNNNCGCANNNGATCGTCGGACTGTAGAACTCTGAACCCCTATAGTGAGTCGTATTACCGGGAGCTT  
384 /5Phos/TCGAACNNNAGCGNNNGATCGTCGGACTGTAGAACTCTGAACCCCTATAGTGAGTCGTATTACCGGGAGCTT
